# Supplementary material for: Exploration of the regulatory mechanism for hepatocellular carcinoma based on ceRNA networks analysis and immune infiltration
Source: Research Square preprint supplement (doi:10.21203/rs.3.rs-885697/v1), 2021-09-16
Supplement: Supplementary file 1 [file d9e98dd28b3b7a9159f68e4c.xlsx]

## Sheet: mRNA.diff
symbol	group	baseMean	logFC	lfcSE	stat	PValue	FDR
GABRD	protein_coding	165.171	4.52168	0.194875	23.203	4.25141e-119	5.79509e-115
PLVAP	protein_coding	4412.8	2.9072	0.138198	21.0364	3.04583e-98	2.07589e-94
CDKN3	protein_coding	368.211	3.90992	0.189153	20.6706	6.36858e-95	2.89367e-91
CDC25C	protein_coding	195.247	4.34853	0.212586	20.4554	5.38068e-93	1.8336e-89
UBE2T	protein_coding	369.155	3.19988	0.157193	20.3564	4.07707e-92	1.11149e-88
CENPF	protein_coding	987.999	3.88489	0.192133	20.2198	6.56077e-91	1.3264e-87
NUF2	protein_coding	269.841	4.19248	0.207376	20.2168	6.95871e-91	1.3264e-87
SKA1	protein_coding	220.556	4.47241	0.221282	20.2113	7.78463e-91	1.3264e-87
TROAP	protein_coding	383.938	4.2197	0.210001	20.0937	8.37661e-90	1.26868e-86
ZIC2	protein_coding	234.582	6.66555	0.332357	20.0554	1.81095e-89	2.4685e-86
KIFC1	protein_coding	634.003	3.75686	0.190088	19.7638	6.10565e-87	7.56601e-84
THBS4	protein_coding	721.029	5.51441	0.280554	19.6554	5.19636e-86	5.90263e-83
BIRC5	protein_coding	1027.78	4.0926	0.208412	19.637	7.467e-86	7.49178e-83
KIF4A	protein_coding	463.136	3.91091	0.199176	19.6355	7.69459e-86	7.49178e-83
HJURP	protein_coding	334.874	3.89109	0.19874	19.5788	2.34521e-85	2.13117e-82
NEK2	protein_coding	335.287	3.9299	0.201602	19.4933	1.25091e-84	1.0657e-81
CDCA5	protein_coding	527.614	3.43393	0.176497	19.4561	2.58964e-84	2.07644e-81
GPC3	protein_coding	29236.4	5.93453	0.305978	19.3953	8.45142e-84	6.40007e-81
ADAMTS13	protein_coding	508.56	-2.81726	0.14532	-19.3866	1.0017e-83	7.18642e-81
CCNB2	protein_coding	422.367	3.72444	0.192596	19.3382	2.56492e-83	1.74812e-80
MELK	protein_coding	287.669	3.78605	0.195846	19.3318	2.90181e-83	1.81439e-80
COL15A1	protein_coding	1028.02	3.79914	0.196528	19.3313	2.92837e-83	1.81439e-80
CDC20	protein_coding	797.577	4.2798	0.221735	19.3014	5.23056e-83	3.0999e-80
NCAPG	protein_coding	404.184	3.79647	0.197929	19.181	5.33579e-82	3.03051e-79
ASPM	protein_coding	817.471	3.70879	0.193553	19.1617	7.73103e-82	4.21527e-79
ARHGEF39	protein_coding	216.538	2.93252	0.153072	19.1578	8.33834e-82	4.37153e-79
KIF2C	protein_coding	420.137	3.93654	0.205533	19.1528	9.16784e-82	4.6284e-79
SPC24	protein_coding	487.835	3.48176	0.182044	19.1259	1.53667e-81	7.48083e-79
SLC26A6	protein_coding	1012.39	2.64094	0.138586	19.0563	5.82392e-81	2.73744e-78
TOP2A	protein_coding	1801.24	3.89537	0.204449	19.053	6.20137e-81	2.8177e-78
PRC1	protein_coding	763.253	3.21023	0.168751	19.0235	1.09038e-80	4.7945e-78
KIF18B	protein_coding	261.158	4.03267	0.21382	18.8601	2.42623e-79	1.0335e-76
UBE2C	protein_coding	648.827	4.11635	0.218475	18.8413	3.4658e-79	1.43159e-76
MXD3	protein_coding	432.172	2.66582	0.141908	18.7856	9.91026e-79	3.97314e-76
CCNB1	protein_coding	911.578	3.27481	0.174651	18.7506	1.91411e-78	7.45463e-76
PTTG1	protein_coding	723.822	3.73424	0.199436	18.724	3.1553e-78	1.19472e-75
KIF20A	protein_coding	427.489	3.71249	0.198777	18.6766	7.67068e-78	2.82592e-75
EXO1	protein_coding	197.358	3.60449	0.193454	18.6323	1.75697e-77	6.30242e-75
MYBL2	protein_coding	959.185	4.56858	0.245334	18.6219	2.13384e-77	7.45803e-75
NDC80	protein_coding	326.741	3.30751	0.177776	18.6049	2.93049e-77	9.98637e-75
CDK1	protein_coding	625.848	3.4808	0.187405	18.5737	5.25082e-77	1.7457e-74
BUB1	protein_coding	332.322	3.49863	0.188792	18.5317	1.1466e-76	3.72127e-74
CENPA	protein_coding	132.77	4.10592	0.221956	18.4988	2.11159e-76	6.69373e-74
DLGAP5	protein_coding	251.411	3.70859	0.200634	18.4843	2.76021e-76	8.55102e-74
FOXM1	protein_coding	705.77	3.60001	0.197231	18.2528	1.96698e-74	5.95822e-72
CXorf36	protein_coding	426.747	2.20285	0.12096	18.2113	4.197e-74	1.24368e-71
HOXA13	protein_coding	272.788	6.9717	0.387168	18.0069	1.71976e-72	4.98766e-70
CDCA3	protein_coding	319.73	3.30126	0.183766	17.9645	3.69826e-72	1.05023e-69
E2F1	protein_coding	882.457	3.67032	0.204571	17.9416	5.58729e-72	1.50328e-69
ESM1	protein_coding	453.538	4.16379	0.23206	17.9427	5.47148e-72	1.50328e-69
SKA3	protein_coding	178.409	3.54311	0.197485	17.9412	5.6245e-72	1.50328e-69
PLK1	protein_coding	478.806	3.54304	0.197979	17.896	1.26626e-71	3.3193e-69
CDKN2A	protein_coding	689.909	4.0572	0.227316	17.8482	2.98241e-71	7.67041e-69
TTK	protein_coding	216.885	3.78408	0.212376	17.8178	5.14282e-71	1.29818e-68
CDCA8	protein_coding	352.867	3.16461	0.177808	17.7979	7.33727e-71	1.81844e-68
OIT3	protein_coding	1060.6	-3.27385	0.184399	-17.7542	1.59876e-70	3.89155e-68
ANLN	protein_coding	490.876	3.62845	0.204601	17.7343	2.28064e-70	5.45394e-68
HMMR	protein_coding	367.049	3.22799	0.182447	17.6928	4.76417e-70	1.11966e-67
APLN	protein_coding	354.874	3.88428	0.219633	17.6853	5.43895e-70	1.25658e-67
PKMYT1	protein_coding	258.088	3.16733	0.180465	17.5509	5.85102e-69	1.32925e-66
AURKB	protein_coding	358.899	3.57545	0.206423	17.321	3.26771e-67	7.30199e-65
IQGAP3	protein_coding	732.154	3.41272	0.197391	17.2891	5.68229e-67	1.24928e-64
TRIP13	protein_coding	232.136	3.43219	0.198859	17.2594	9.50185e-67	2.05587e-64
DTL	protein_coding	464.814	3.25647	0.188761	17.2518	1.08442e-66	2.30965e-64
CDT1	protein_coding	539.222	3.42228	0.198439	17.246	1.19883e-66	2.51403e-64
MKI67	protein_coding	1315.31	3.35166	0.194418	17.2395	1.34251e-66	2.77269e-64
GTSE1	protein_coding	217.387	3.53849	0.205361	17.2306	1.56645e-66	3.1869e-64
BUB1B	protein_coding	258.785	3.51071	0.203998	17.2095	2.25439e-66	4.51906e-64
RACGAP1	protein_coding	627.648	2.41007	0.140195	17.1908	3.11268e-66	6.14913e-64
RRM2	protein_coding	1204.97	3.07395	0.179097	17.1636	4.97139e-66	9.68072e-64
EZH2	protein_coding	511.385	2.40008	0.14014	17.1263	9.44539e-66	1.81233e-63
SPC25	protein_coding	133.954	3.13838	0.183257	17.1255	9.57286e-66	1.81233e-63
IGF2BP1	protein_coding	636.05	7.01917	0.410188	17.1121	1.20618e-65	2.25226e-63
DEPDC1	protein_coding	213.259	3.761	0.220513	17.0557	3.1701e-65	5.7267e-63
EME1	protein_coding	99.4652	3.23869	0.189893	17.0553	3.19294e-65	5.7267e-63
CDC6	protein_coding	555.924	3.20874	0.18841	17.0306	4.87076e-65	8.51196e-63
CENPM	protein_coding	294.191	3.54597	0.208628	16.9966	8.7075e-65	1.50243e-62
CELSR3	protein_coding	289.934	3.47635	0.204855	16.9698	1.37366e-64	2.34054e-62
AURKA	protein_coding	799.727	2.68581	0.158653	16.9288	2.75826e-64	4.64171e-62
TICRR	protein_coding	108.886	3.65826	0.216119	16.9271	2.84135e-64	4.72322e-62
TOMM40L	protein_coding	1472.15	1.71853	0.101648	16.9066	4.02278e-64	6.60657e-62
MAP2K1	protein_coding	1992.75	-1.28049	0.0757754	-16.8984	4.62059e-64	7.49801e-62
CENPE	protein_coding	220.027	3.14008	0.185934	16.8881	5.50279e-64	8.82453e-62
CD34	protein_coding	1863.84	2.08414	0.123704	16.8479	1.08772e-63	1.72404e-61
CENPL	protein_coding	184.666	2.36377	0.140741	16.7952	2.64576e-63	4.14533e-61
TRAIP	protein_coding	162.092	2.81996	0.16806	16.7795	3.44862e-63	5.34183e-61
CDH13	protein_coding	395.904	2.32009	0.138457	16.7568	5.05307e-63	7.73914e-61
FAM189B	protein_coding	1282.72	1.66523	0.0995463	16.7282	8.16687e-63	1.23692e-60
TGM3	protein_coding	872.919	5.36033	0.321533	16.6712	2.12423e-62	3.18191e-60
PBK	protein_coding	247.797	3.39007	0.205304	16.5124	2.98831e-61	4.42757e-59
KIF23	protein_coding	270.375	3.2933	0.200288	16.4429	9.43719e-61	1.38321e-58
OLFML2B	protein_coding	382.293	2.98549	0.182369	16.3706	3.10248e-60	4.49892e-58
CDC45	protein_coding	254.972	3.07345	0.188021	16.3463	4.624e-60	6.6347e-58
CKAP2L	protein_coding	201.135	3.1929	0.195441	16.3369	5.39085e-60	7.65445e-58
NCAPH	protein_coding	242.393	2.96836	0.181833	16.3246	6.59527e-60	9.26805e-58
CCNA2	protein_coding	553.734	3.49355	0.214048	16.3213	6.9583e-60	9.67842e-58
CSRNP1	protein_coding	1965.79	-2.25305	0.138108	-16.3137	7.88176e-60	1.08522e-57
FLVCR1	protein_coding	639.61	2.19935	0.135254	16.2609	1.86912e-59	2.54779e-57
E2F8	protein_coding	139.294	3.63681	0.223979	16.2373	2.74727e-59	3.70773e-57
KIF14	protein_coding	189.615	3.08876	0.190288	16.2321	2.99224e-59	3.99875e-57
MDK	protein_coding	7226.39	3.81711	0.236049	16.1708	8.10087e-59	1.07207e-56
MND1	protein_coding	109.752	2.92819	0.181325	16.1488	1.15723e-58	1.51674e-56
TCF19	protein_coding	760.683	2.7698	0.172442	16.0622	4.69393e-58	6.09362e-56
MSTO1	protein_coding	566.775	1.69885	0.105812	16.0554	5.23842e-58	6.73631e-56
CENPI	protein_coding	88.1672	3.09541	0.193192	16.0225	8.90661e-58	1.13464e-55
KIF18A	protein_coding	110.65	3.33923	0.208507	16.015	1.00477e-57	1.26815e-55
VPS45	protein_coding	1256.63	1.11816	0.0698256	16.0136	1.0277e-57	1.28519e-55
PARPBP	protein_coding	139.447	2.69371	0.169361	15.9051	5.84117e-57	7.23827e-55
ASF1B	protein_coding	393.567	2.97775	0.18732	15.8966	6.6901e-57	8.21556e-55
ECM1	protein_coding	713.099	-3.05878	0.192495	-15.8902	7.40797e-57	9.01589e-55
SGO1	protein_coding	124.915	3.04399	0.191674	15.8811	8.56596e-57	1.0333e-54
ANGPTL6	protein_coding	273.888	-2.9772	0.187897	-15.8449	1.52531e-56	1.82381e-54
C5orf34	protein_coding	67.2981	2.39762	0.151336	15.8431	1.56956e-56	1.86041e-54
KIF15	protein_coding	152.779	3.34948	0.212245	15.7812	4.19315e-56	4.92731e-54
CFP	protein_coding	417.828	-3.38765	0.214963	-15.7592	5.93499e-56	6.91452e-54
SHCBP1	protein_coding	165.766	3.31678	0.210524	15.7549	6.35576e-56	7.34198e-54
DUSP9	protein_coding	1153.82	5.038	0.320709	15.7089	1.3138e-55	1.50491e-53
CEP131	protein_coding	624.707	1.79295	0.114352	15.6792	2.09818e-55	2.38335e-53
THY1	protein_coding	2171.51	2.54864	0.162621	15.6723	2.34076e-55	2.63693e-53
SPATS2	protein_coding	720.847	1.56999	0.100575	15.6101	6.21355e-55	6.94237e-53
DIAPH3	protein_coding	147.426	3.38528	0.217092	15.5938	8.02059e-55	8.88851e-53
ORC1	protein_coding	165.502	2.91956	0.189515	15.4054	1.50548e-53	1.65494e-51
MMP11	protein_coding	776.366	3.79853	0.247118	15.3713	2.54908e-53	2.77972e-51
RCAN1	protein_coding	3375.82	-2.40005	0.157029	-15.2841	9.76133e-53	1.05601e-50
SPDL1	protein_coding	281.818	1.80366	0.118101	15.2721	1.17303e-52	1.25902e-50
EPS8L3	protein_coding	770.795	4.93507	0.323243	15.2673	1.26199e-52	1.34393e-50
PLXDC1	protein_coding	301.62	2.83738	0.186341	15.2268	2.34824e-52	2.48131e-50
C16orf59	protein_coding	209.344	2.78224	0.183198	15.1871	4.30785e-52	4.51695e-50
XRCC2	protein_coding	102.308	2.89559	0.1909	15.1681	5.75503e-52	5.98831e-50
ARHGAP11A	protein_coding	343.685	2.53734	0.167356	15.1613	6.37517e-52	6.58333e-50
TARBP1	protein_coding	1320.35	1.7822	0.117619	15.1523	7.31779e-52	7.49991e-50
B4GALNT1	protein_coding	333.663	4.22297	0.278735	15.1505	7.52277e-52	7.65246e-50
TMEM120B	protein_coding	428.055	1.24974	0.0825295	15.143	8.43204e-52	8.51386e-50
GMNN	protein_coding	1689.25	2.19569	0.145101	15.1322	9.92933e-52	9.95197e-50
UHRF1	protein_coding	258.116	3.23184	0.213601	15.1303	1.02214e-51	1.01699e-49
RECQL4	protein_coding	930.396	2.70198	0.178984	15.0962	1.7155e-51	1.69449e-49
RND3	protein_coding	2361.71	-2.48949	0.16509	-15.0796	2.20758e-51	2.16486e-49
ZWINT	protein_coding	716.249	2.45567	0.162962	15.0689	2.59231e-51	2.52399e-49
E2F2	protein_coding	115.283	2.9985	0.199533	15.0276	4.84239e-51	4.68132e-49
RAD54L	protein_coding	102.779	3.36303	0.224341	14.9907	8.4458e-51	8.10737e-49
DSCC1	protein_coding	166.729	2.07729	0.13867	14.9801	9.90346e-51	9.44014e-49
GINS1	protein_coding	370.764	2.73282	0.182641	14.9628	1.28419e-50	1.21561e-48
FANCI	protein_coding	535.084	2.2622	0.151327	14.9491	1.57965e-50	1.48498e-48
POLQ	protein_coding	119.174	2.99131	0.20041	14.926	2.23376e-50	2.08551e-48
ORC6	protein_coding	136.167	2.85123	0.191098	14.9202	2.43371e-50	2.25673e-48
CENPW	protein_coding	261.897	2.58946	0.173711	14.9067	2.9818e-50	2.74627e-48
LRRC14	protein_coding	1238	1.50381	0.100894	14.9049	3.06273e-50	2.80188e-48
CCNF	protein_coding	362.142	2.18313	0.146674	14.8842	4.17379e-50	3.79286e-48
TBC1D16	protein_coding	1948.29	1.6981	0.114114	14.8808	4.39013e-50	3.96304e-48
STIL	protein_coding	188.391	2.37249	0.15986	14.841	7.95515e-50	7.13399e-48
CDCA2	protein_coding	102.037	3.19114	0.215567	14.8035	1.39043e-49	1.23876e-47
GNAZ	protein_coding	514.004	3.64716	0.246389	14.8025	1.41186e-49	1.24968e-47
JRK	protein_coding	378.43	1.76109	0.119114	14.7849	1.83429e-49	1.61311e-47
WDR62	protein_coding	294.77	2.55998	0.173714	14.7368	3.74312e-49	3.27067e-47
C21orf58	protein_coding	167.886	2.27006	0.154686	14.6752	9.29112e-49	8.0667e-47
SGO2	protein_coding	181.807	2.38064	0.162246	14.673	9.59836e-49	8.28072e-47
TTC13	protein_coding	674.43	1.40331	0.0956699	14.6682	1.02997e-48	8.82992e-47
TONSL	protein_coding	686.496	1.94096	0.13277	14.619	2.1256e-48	1.81088e-46
CEP55	protein_coding	169.576	3.05872	0.209798	14.5794	3.80082e-48	3.21795e-46
ZFP41	protein_coding	453.156	1.93277	0.132697	14.5653	4.66694e-48	3.92685e-46
FAM83D	protein_coding	515.875	2.39289	0.164925	14.5089	1.06338e-47	8.89262e-46
MCM10	protein_coding	160.189	3.03938	0.210106	14.4659	1.98901e-47	1.65318e-45
UCK2	protein_coding	1362.95	1.6404	0.113507	14.4519	2.43878e-47	2.01473e-45
OLFML2A	protein_coding	456.685	2.40294	0.16629	14.4503	2.4946e-47	2.04843e-45
ZNF692	protein_coding	913.202	1.69096	0.117203	14.4276	3.47084e-47	2.83299e-45
STMN1	protein_coding	3295.39	2.10838	0.146425	14.3991	5.24516e-47	4.25576e-45
ZFP36	protein_coding	7555.37	-2.16437	0.150401	-14.3907	5.92118e-47	4.77583e-45
PYGO2	protein_coding	2297.69	1.21411	0.0843761	14.3893	6.03911e-47	4.8423e-45
TNFRSF4	protein_coding	157.383	2.33653	0.162911	14.3423	1.18995e-46	9.48547e-45
NUSAP1	protein_coding	947.606	2.25535	0.157593	14.3112	1.86148e-46	1.47522e-44
PCLAF	protein_coding	388.415	2.46887	0.172722	14.2939	2.38857e-46	1.882e-44
COX4I2	protein_coding	93.4788	2.85442	0.200234	14.2554	4.15022e-46	3.25124e-44
NDUFA4L2	protein_coding	1192.43	2.86107	0.200744	14.2523	4.33708e-46	3.37822e-44
PTH1R	protein_coding	287.141	-3.23815	0.227335	-14.244	4.88717e-46	3.78506e-44
CCNE1	protein_coding	249.874	3.59637	0.252741	14.2295	6.01061e-46	4.62885e-44
CDKN2C	protein_coding	764.81	2.28573	0.160783	14.2163	7.26163e-46	5.56086e-44
CENPK	protein_coding	112.049	2.62842	0.185095	14.2003	9.11616e-46	6.94203e-44
ANKRD52	protein_coding	1364.88	1.41874	0.100311	14.1433	2.05372e-45	1.55523e-43
C21orf91	protein_coding	348.153	-1.70135	0.120447	-14.1254	2.65045e-45	1.98507e-43
PIF1	protein_coding	119.888	2.74804	0.194655	14.1175	2.96493e-45	2.20847e-43
MAPT	protein_coding	328.86	2.99182	0.211954	14.1154	3.05163e-45	2.26069e-43
CTHRC1	protein_coding	333.096	4.01675	0.28485	14.1013	3.7289e-45	2.74749e-43
VIPR1	protein_coding	320.936	-3.47742	0.246907	-14.0839	4.7713e-45	3.49664e-43
RASL12	protein_coding	151.138	2.22792	0.158265	14.0771	5.25277e-45	3.8289e-43
MCM2	protein_coding	1400.78	2.39383	0.170333	14.0538	7.29665e-45	5.29046e-43
TP73	protein_coding	136.591	3.4125	0.242879	14.0502	7.68218e-45	5.54052e-43
CDC37L1	protein_coding	1495.15	-1.5924	0.113399	-14.0425	8.56799e-45	6.14686e-43
RNASEH2A	protein_coding	876.757	1.87962	0.133916	14.0358	9.40819e-45	6.71429e-43
XRCC3	protein_coding	326.369	1.63455	0.11649	14.0317	9.97241e-45	7.07989e-43
RFC4	protein_coding	668.128	1.73371	0.123647	14.0214	1.15264e-44	8.14073e-43
LRAT	protein_coding	141.055	-2.91331	0.207787	-14.0207	1.16537e-44	8.18825e-43
TRIB1	protein_coding	5841.11	-1.99688	0.14274	-13.9897	1.80224e-44	1.25981e-42
ECT2	protein_coding	545.472	2.39011	0.17092	13.9838	1.95819e-44	1.36184e-42
KAT2A	protein_coding	2384.61	1.48391	0.106137	13.9811	2.0339e-44	1.40731e-42
CAP2	protein_coding	1294.46	2.25201	0.161141	13.9754	2.20317e-44	1.51674e-42
SEMA5B	protein_coding	193.661	2.30193	0.165196	13.9345	3.90874e-44	2.67739e-42
DEPDC1B	protein_coding	230.589	3.21222	0.230964	13.9078	5.6761e-44	3.86855e-42
TK1	protein_coding	1507.98	2.32303	0.167705	13.8519	1.23861e-43	8.39978e-42
SLC7A11	protein_coding	333.53	4.30582	0.311287	13.8323	1.62702e-43	1.09791e-41
NRBF2	protein_coding	1126.06	-1.11772	0.0809145	-13.8136	2.11076e-43	1.41733e-41
GJC1	protein_coding	197.728	2.35423	0.170475	13.8098	2.22408e-43	1.4861e-41
FANCD2	protein_coding	319.358	2.20528	0.159956	13.7868	3.06217e-43	2.03612e-41
SMG5	protein_coding	6058.71	1.34067	0.09747	13.7547	4.77243e-43	3.15791e-41
ABCC10	protein_coding	606.496	1.35578	0.0985912	13.7516	4.98324e-43	3.28148e-41
C1RL	protein_coding	7189.01	-1.65452	0.120363	-13.7461	5.37641e-43	3.52336e-41
MAD2L1	protein_coding	342.281	2.1512	0.156587	13.738	6.00846e-43	3.91872e-41
USP21	protein_coding	677.598	1.15583	0.0842074	13.7261	7.08938e-43	4.60168e-41
CPEB3	protein_coding	723.964	-2.2845	0.166473	-13.723	7.39837e-43	4.77949e-41
CHAF1B	protein_coding	270.655	2.57717	0.188157	13.6969	1.05918e-42	6.81023e-41
CENPH	protein_coding	187.249	1.85397	0.135485	13.6839	1.2672e-42	8.10951e-41
EHMT2	protein_coding	2307.58	1.30751	0.0957149	13.6604	1.74902e-42	1.11406e-40
TBC1D31	protein_coding	259.635	1.3791	0.101048	13.648	2.07464e-42	1.31532e-40
KIF11	protein_coding	351.435	2.19322	0.161084	13.6154	3.24507e-42	2.03841e-40
TACC3	protein_coding	1207.03	2.11581	0.155597	13.598	4.11275e-42	2.5716e-40
HDAC11	protein_coding	1023.98	1.75613	0.129207	13.5916	4.49318e-42	2.79664e-40
RAD51	protein_coding	140.273	2.33528	0.172247	13.5577	7.12986e-42	4.40359e-40
FEN1	protein_coding	1256.62	1.62013	0.119499	13.5576	7.13957e-42	4.40359e-40
MTBP	protein_coding	109.481	1.85894	0.137389	13.5306	1.03248e-41	6.33953e-40
AFP	protein_coding	14497.4	6.02397	0.445941	13.5085	1.39402e-41	8.51686e-40
LIFR	protein_coding	880.865	-2.81975	0.208744	-13.5082	1.39959e-41	8.51686e-40
KMT5C	protein_coding	374.811	1.4939	0.110676	13.498	1.6067e-41	9.73376e-40
TRIM45	protein_coding	171.374	2.2881	0.169707	13.4827	1.97845e-41	1.19328e-39
TMEM206	protein_coding	189.642	1.33153	0.0987703	13.4811	2.02144e-41	1.21385e-39
ZFP1	protein_coding	388.482	-1.72288	0.127969	-13.4632	2.57444e-41	1.53913e-39
S100P	protein_coding	2482.62	5.7044	0.42445	13.4395	3.54842e-41	2.11216e-39
DBH	protein_coding	450.409	-3.21775	0.239576	-13.431	3.98008e-41	2.3588e-39
HELLS	protein_coding	317.541	2.40141	0.178825	13.4288	4.09874e-41	2.41861e-39
FCN3	protein_coding	1319.89	-4.07981	0.304051	-13.4182	4.73208e-41	2.7803e-39
PRR11	protein_coding	256.157	2.48579	0.185277	13.4166	4.83496e-41	2.82856e-39
EHD3	protein_coding	355.266	-2.15177	0.16057	-13.4008	5.9784e-41	3.48255e-39
DCUN1D3	protein_coding	469.193	-1.19797	0.0894489	-13.3928	6.65955e-41	3.86282e-39
ROBO1	protein_coding	2889.33	2.88337	0.215466	13.382	7.70022e-41	4.42876e-39
CDH24	protein_coding	144.352	2.18985	0.163735	13.3743	8.54036e-41	4.89133e-39
CENPU	protein_coding	412.223	2.17494	0.162971	13.3456	1.25732e-40	7.17092e-39
CSPG4	protein_coding	499.432	2.11089	0.158196	13.3435	1.29323e-40	7.34498e-39
KIAA1841	protein_coding	177.251	1.53429	0.115218	13.3164	1.85789e-40	1.04648e-38
TUBE1	protein_coding	572.005	-1.81558	0.136448	-13.306	2.13659e-40	1.19851e-38
GPRIN1	protein_coding	171.146	2.60044	0.195761	13.2837	2.87749e-40	1.6075e-38
CBX2	protein_coding	225.704	2.70532	0.203904	13.2676	3.56724e-40	1.9847e-38
SCAMP3	protein_coding	4675.36	1.2721	0.096	13.2511	4.44749e-40	2.46438e-38
DBF4B	protein_coding	198.13	1.54734	0.116824	13.2451	4.81728e-40	2.64776e-38
USP49	protein_coding	188.597	1.2565	0.094864	13.2453	4.80222e-40	2.64776e-38
NQO1	protein_coding	7990.43	4.80684	0.363026	13.241	5.08572e-40	2.78408e-38
ADRA2B	protein_coding	124.975	-2.24221	0.169489	-13.2292	5.94992e-40	3.24414e-38
MSH2	protein_coding	712.524	1.28596	0.0972196	13.2274	6.09591e-40	3.31049e-38
MCL1	protein_coding	16406.6	-1.2595	0.0952252	-13.2266	6.1642e-40	3.33429e-38
CEP250	protein_coding	1069.73	1.07592	0.0813732	13.222	6.54692e-40	3.52731e-38
RAB3B	protein_coding	585.719	3.7814	0.286025	13.2205	6.68058e-40	3.58516e-38
MRAP2	protein_coding	174.664	4.13108	0.312588	13.2157	7.12088e-40	3.80646e-38
AADAT	protein_coding	596.72	-2.80928	0.212725	-13.2062	8.08289e-40	4.30382e-38
MUC13	protein_coding	6039.31	5.19998	0.394029	13.1969	9.13631e-40	4.8458e-38
ZNF517	protein_coding	689.678	1.71691	0.130236	13.1831	1.09817e-39	5.80198e-38
CETP	protein_coding	468.567	-2.79025	0.211997	-13.1617	1.45704e-39	7.66829e-38
MCM6	protein_coding	1319.78	1.73246	0.131736	13.151	1.67931e-39	8.80412e-38
WDR76	protein_coding	275.954	2.22304	0.169102	13.1461	1.79091e-39	9.35322e-38
FAM111B	protein_coding	310.827	2.58908	0.197264	13.1249	2.3698e-39	1.23293e-37
PLSCR4	protein_coding	1032.26	-1.93723	0.147796	-13.1075	2.98288e-39	1.54599e-37
PHLDA1	protein_coding	4584.63	-2.48508	0.190322	-13.0572	5.77781e-39	2.97734e-37
ETS2	protein_coding	9831.83	-1.69429	0.12976	-13.0571	5.78825e-39	2.97734e-37
SPRY2	protein_coding	632.266	-1.55298	0.119325	-13.0147	1.00946e-38	5.17289e-37
NR2C2AP	protein_coding	736.505	1.32538	0.102061	12.9861	1.46714e-38	7.46218e-37
BLM	protein_coding	144.294	2.45846	0.189488	12.9742	1.71344e-38	8.6825e-37
KIAA0907	protein_coding	1145.29	1.29516	0.0998664	12.9689	1.8363e-38	9.27061e-37
AP5Z1	protein_coding	1638.72	1.12186	0.0865293	12.9651	1.92989e-38	9.70712e-37
SEMA3F	protein_coding	907.624	1.25845	0.0970737	12.9638	1.96199e-38	9.83229e-37
CHAF1A	protein_coding	736.062	1.45685	0.112411	12.96	2.06177e-38	1.0285e-36
PEA15	protein_coding	5021.59	1.16228	0.0896883	12.9591	2.08582e-38	1.03389e-36
SOCS7	protein_coding	394.253	1.51174	0.116702	12.9538	2.23489e-38	1.10376e-36
PPOX	protein_coding	830.439	1.1514	0.0889089	12.9503	2.34094e-38	1.15196e-36
PLK4	protein_coding	115.403	2.11355	0.163466	12.9296	3.06362e-38	1.50217e-36
CHTF18	protein_coding	450.232	1.70441	0.131836	12.9283	3.11834e-38	1.52351e-36
WDHD1	protein_coding	183.552	1.9995	0.154665	12.928	3.13025e-38	1.52387e-36
PRIM2	protein_coding	352.591	1.16606	0.0903384	12.9077	4.07251e-38	1.96852e-36
RAD51AP1	protein_coding	167.526	2.2673	0.175834	12.8946	4.82921e-38	2.31785e-36
DENND4B	protein_coding	1630.91	1.04368	0.0810509	12.8768	6.08062e-38	2.90824e-36
SPATC1L	protein_coding	245.547	2.92254	0.227006	12.8743	6.28124e-38	2.99369e-36
TMEM79	protein_coding	281.65	1.08998	0.084823	12.85	8.59921e-38	4.08417e-36
TIGD5	protein_coding	599.102	1.59891	0.124469	12.8458	9.07814e-38	4.29667e-36
NT5DC2	protein_coding	1114.66	2.64587	0.206569	12.8086	1.4668e-37	6.9183e-36
MCM3	protein_coding	3021.71	1.53565	0.119935	12.8039	1.55833e-37	7.3247e-36
CBFA2T2	protein_coding	793.83	1.18419	0.0925311	12.7978	1.68701e-37	7.90228e-36
PIGC	protein_coding	1408.11	1.05606	0.0825276	12.7964	1.71689e-37	8.01469e-36
FOS	protein_coding	6031.54	-3.09337	0.241907	-12.7875	1.92692e-37	8.96445e-36
C1orf35	protein_coding	854.689	1.30215	0.101902	12.7784	2.1642e-37	1.00001e-35
RUSC1	protein_coding	949.406	1.38122	0.108209	12.7644	2.59281e-37	1.18999e-35
OIP5	protein_coding	90.9776	2.24374	0.175843	12.7599	2.74526e-37	1.25573e-35
FANCG	protein_coding	437.18	1.46002	0.114554	12.7452	3.31529e-37	1.50636e-35
CDC7	protein_coding	182.57	2.0576	0.161447	12.7448	3.33395e-37	1.5098e-35
FOXS1	protein_coding	105.884	2.85879	0.224549	12.7312	3.96446e-37	1.78939e-35
MAPK8IP2	protein_coding	442.051	3.27352	0.257272	12.724	4.35278e-37	1.95817e-35
IQCC	protein_coding	91.1617	1.48035	0.116579	12.6983	6.04298e-37	2.68312e-35
ACADS	protein_coding	5383.86	-1.78979	0.141025	-12.6913	6.60717e-37	2.9241e-35
GBA	protein_coding	3501.5	1.3614	0.107333	12.6839	7.25809e-37	3.20178e-35
LYPD1	protein_coding	297.467	4.09642	0.323138	12.677	7.92992e-37	3.47565e-35
C9orf172	protein_coding	228.618	1.89103	0.149167	12.6772	7.90753e-37	3.47565e-35
ADCY6	protein_coding	1313.55	1.16045	0.0920084	12.6125	1.80242e-36	7.82448e-35
TBCE	protein_coding	1492.98	1.09093	0.0865014	12.6117	1.82054e-36	7.87803e-35
LCN2	protein_coding	10147.7	4.73572	0.377017	12.561	3.45882e-36	1.48261e-34
DNAJC6	protein_coding	206.799	2.57443	0.205078	12.5534	3.80701e-36	1.62675e-34
DUSP6	protein_coding	3655.43	-1.74423	0.138954	-12.5526	3.84726e-36	1.63881e-34
CAD	protein_coding	1429.92	1.26592	0.100955	12.5394	4.54305e-36	1.92917e-34
ALG1L	protein_coding	294.878	3.38211	0.270096	12.5219	5.66686e-36	2.39891e-34
DDX39A	protein_coding	2442.64	1.46683	0.117384	12.496	7.85299e-36	3.28356e-34
MYD88	protein_coding	2297.83	-1.05344	0.0843849	-12.4838	9.15235e-36	3.80838e-34
EPHA2	protein_coding	1471.74	-2.08999	0.167635	-12.4676	1.12214e-35	4.6492e-34
TRIM11	protein_coding	933.562	1.1195	0.0898617	12.458	1.26461e-35	5.2236e-34
ZNF251	protein_coding	559.967	1.25522	0.100845	12.4471	1.44983e-35	5.97058e-34
DHX34	protein_coding	1050.58	1.15226	0.0928094	12.4153	2.15813e-35	8.86066e-34
KCTD7	protein_coding	276.335	1.30254	0.105075	12.3963	2.73619e-35	1.11668e-33
RTL10	protein_coding	621.62	1.11554	0.0900029	12.3945	2.79879e-35	1.13882e-33
KIFC2	protein_coding	538.758	1.95263	0.157601	12.3897	2.97075e-35	1.20519e-33
RAD54B	protein_coding	75.7558	1.63196	0.131723	12.3894	2.98324e-35	1.20666e-33
MSH5	protein_coding	91.5132	2.21737	0.178979	12.389	2.99771e-35	1.20893e-33
NUDT17	protein_coding	79.9026	1.81834	0.146887	12.3791	3.38996e-35	1.36308e-33
UBE2S	protein_coding	701.726	1.97617	0.159725	12.3724	3.68838e-35	1.47438e-33
SGMS2	protein_coding	780.746	-1.79499	0.145122	-12.3688	3.85512e-35	1.53652e-33
EFNA4	protein_coding	436.45	1.55008	0.125554	12.3459	5.1256e-35	2.03694e-33
IL1RAP	protein_coding	1896.91	-2.05653	0.166755	-12.3327	6.03908e-35	2.39299e-33
PNRC1	protein_coding	5013.46	-1.44901	0.117509	-12.331	6.16749e-35	2.43678e-33
SPSB2	protein_coding	434.652	1.51141	0.12268	12.3199	7.08199e-35	2.79002e-33
CCT3	protein_coding	15482.2	1.16886	0.0949485	12.3104	7.961e-35	3.12727e-33
NSMCE2	protein_coding	991.847	1.43748	0.116779	12.3094	8.06147e-35	3.15764e-33
TTC39A	protein_coding	511.841	3.16664	0.257428	12.3011	8.93949e-35	3.49152e-33
DNASE1L3	protein_coding	1362.84	-2.89687	0.23554	-12.2989	9.18707e-35	3.57797e-33
TIGD1	protein_coding	131.429	1.79072	0.145645	12.2951	9.62467e-35	3.73772e-33
CCHCR1	protein_coding	1366.37	1.40163	0.114101	12.2841	1.10285e-34	4.27073e-33
CUL7	protein_coding	1694.57	1.14543	0.0933029	12.2764	1.21235e-34	4.66825e-33
FAAP24	protein_coding	109.326	1.45571	0.118938	12.2393	1.9164e-34	7.31721e-33
COG2	protein_coding	1069.42	1.00709	0.0823765	12.2255	2.27173e-34	8.6497e-33
ETFDH	protein_coding	3021.05	-1.68198	0.137805	-12.2055	2.90568e-34	1.10327e-32
G6PD	protein_coding	1872.01	2.61156	0.213978	12.2048	2.92904e-34	1.10905e-32
MYO19	protein_coding	1239.02	1.19752	0.0981875	12.1963	3.25454e-34	1.22888e-32
ERLIN1	protein_coding	3471.89	-1.30618	0.107328	-12.17	4.49111e-34	1.68646e-32
TMEM201	protein_coding	459.979	1.31011	0.10765	12.1701	4.48565e-34	1.68646e-32
FRMD4B	protein_coding	949.157	-1.36997	0.11258	-12.1688	4.55675e-34	1.7064e-32
GLI4	protein_coding	664.353	1.56916	0.129015	12.1626	4.91875e-34	1.83692e-32
ARHGAP11B	protein_coding	78.014	2.11498	0.174201	12.141	6.4039e-34	2.38502e-32
SFN	protein_coding	1401.78	3.85288	0.317364	12.1403	6.46219e-34	2.40017e-32
TBXA2R	protein_coding	183.727	-1.79371	0.148026	-12.1175	8.53365e-34	3.16093e-32
CD4	protein_coding	2811.8	-1.95829	0.161671	-12.1128	9.0356e-34	3.33778e-32
KNTC1	protein_coding	530.725	1.92257	0.158809	12.1062	9.79796e-34	3.60962e-32
EGR1	protein_coding	7743.51	-2.59869	0.214704	-12.1036	1.01081e-33	3.71383e-32
TPX2	protein_coding	1245.65	2.10478	0.173925	12.1017	1.03485e-33	3.79193e-32
PTP4A3	protein_coding	1240.26	2.57631	0.21291	12.1004	1.05046e-33	3.83884e-32
TRIM16	protein_coding	766.471	2.98029	0.246377	12.0965	1.10272e-33	4.01903e-32
GABRE	protein_coding	824.45	2.84661	0.23546	12.0895	1.19965e-33	4.36064e-32
SOCS6	protein_coding	1375.36	-1.08931	0.0901457	-12.0839	1.2843e-33	4.65591e-32
ZBTB21	protein_coding	672.263	-1.44678	0.119871	-12.0694	1.53158e-33	5.53767e-32
KIAA1522	protein_coding	3209.57	1.50676	0.124925	12.0613	1.6906e-33	6.09644e-32
FBXL18	protein_coding	148.813	1.35921	0.112699	12.0605	1.70844e-33	6.14451e-32
C17orf53	protein_coding	132.091	1.92393	0.159575	12.0566	1.78945e-33	6.4021e-32
VPS72	protein_coding	1744.01	1.06392	0.0882532	12.0554	1.81742e-33	6.48515e-32
PLPP3	protein_coding	5392.1	-1.68362	0.139851	-12.0387	2.22454e-33	7.91717e-32
DSN1	protein_coding	752.704	1.26213	0.105078	12.0113	3.09797e-33	1.0997e-31
NOTCH3	protein_coding	1969.59	2.05236	0.171016	12.001	3.51101e-33	1.24308e-31
NAT9	protein_coding	1208.51	1.20827	0.100763	11.9912	3.95082e-33	1.39157e-31
ZNF219	protein_coding	1224.79	1.27791	0.106617	11.986	4.20973e-33	1.47894e-31
POLD1	protein_coding	927.302	1.27635	0.106529	11.9813	4.4529e-33	1.56035e-31
ACBD6	protein_coding	1354.44	1.07504	0.0897894	11.9729	4.92713e-33	1.7221e-31
EDIL3	protein_coding	257.852	2.59648	0.217313	11.9481	6.6408e-33	2.3092e-31
CXCL12	protein_coding	3334.56	-2.66942	0.223586	-11.9391	7.39954e-33	2.56649e-31
CLK2	protein_coding	1358.73	1.03207	0.0865528	11.9242	8.85756e-33	3.0644e-31
CHEK1	protein_coding	337.3	1.6443	0.137974	11.9175	9.59887e-33	3.31246e-31
EBF1	protein_coding	150.559	2.00023	0.167882	11.9145	9.94642e-33	3.42373e-31
NECAB3	protein_coding	1947.25	1.47449	0.123898	11.9008	1.17216e-32	4.0246e-31
SCNM1	protein_coding	1162.81	1.39386	0.117163	11.8967	1.23075e-32	4.21518e-31
NELFE	protein_coding	3128.86	1.3365	0.112364	11.8944	1.26589e-32	4.32463e-31
LYVE1	protein_coding	424.071	-2.97425	0.250222	-11.8864	1.39243e-32	4.74507e-31
LEF1	protein_coding	289.381	2.96248	0.249405	11.8782	1.53659e-32	5.22326e-31
TMEM106C	protein_coding	2875.52	1.48843	0.125378	11.8715	1.664e-32	5.64228e-31
RNF152	protein_coding	1819.67	-1.81461	0.152898	-11.8681	1.73342e-32	5.8631e-31
C8orf4	protein_coding	2379.88	-2.25525	0.190144	-11.8608	1.89228e-32	6.38456e-31
BAIAP2L2	protein_coding	574.012	3.00901	0.253893	11.8515	2.11452e-32	7.11679e-31
TMC7	protein_coding	99.7865	2.16692	0.182934	11.8453	2.27481e-32	7.63741e-31
KLHL15	protein_coding	608.251	-1.36936	0.115619	-11.8437	2.31995e-32	7.75079e-31
KIAA1524	protein_coding	140.417	2.16814	0.183185	11.8358	2.5491e-32	8.49556e-31
NUDT1	protein_coding	464.472	1.83004	0.154661	11.8326	2.64863e-32	8.80572e-31
ZNF775	protein_coding	772.783	1.63138	0.138199	11.8046	3.69631e-32	1.2259e-30
MCM4	protein_coding	2040.48	1.61957	0.13732	11.7941	4.18503e-32	1.38462e-30
ZC2HC1C	protein_coding	196.979	-1.41722	0.12034	-11.7768	5.13851e-32	1.69596e-30
NAAA	protein_coding	1039.81	-1.64638	0.139924	-11.7662	5.8261e-32	1.91825e-30
ZBTB12	protein_coding	137.095	1.88859	0.160566	11.7621	6.11926e-32	2.00992e-30
COLCA2	protein_coding	119.513	2.75647	0.234397	11.7598	6.28636e-32	2.05984e-30
CCDC34	protein_coding	487.466	1.65851	0.141395	11.7296	8.98536e-32	2.93716e-30
SF3B4	protein_coding	3411.52	1.05277	0.0897638	11.7282	9.14018e-32	2.98062e-30
ZADH2	protein_coding	1165.8	-1.07059	0.0912957	-11.7266	9.3109e-32	3.02904e-30
DNAH14	protein_coding	294.641	1.26993	0.108317	11.7242	9.58474e-32	3.1107e-30
SAPCD2	protein_coding	137.902	2.76837	0.236196	11.7207	9.98839e-32	3.23401e-30
RAB11FIP4	protein_coding	1643.26	1.83125	0.156776	11.6807	1.59949e-31	5.15429e-30
RHNO1	protein_coding	510.079	1.14106	0.0977219	11.6766	1.67791e-31	5.39423e-30
ZNF330	protein_coding	1065.69	-1.02446	0.087749	-11.6749	1.71218e-31	5.49148e-30
FOXK1	protein_coding	893.677	1.22065	0.104578	11.6721	1.76991e-31	5.66328e-30
SCRIB	protein_coding	4284.51	1.31637	0.112784	11.6716	1.7807e-31	5.68446e-30
TAZ	protein_coding	1137.64	1.0548	0.0903881	11.6697	1.82102e-31	5.79961e-30
LOXL2	protein_coding	649.534	1.63079	0.139771	11.6675	1.86771e-31	5.93445e-30
SPP1	protein_coding	29661.2	4.28966	0.367801	11.663	1.9697e-31	6.24394e-30
OSBPL3	protein_coding	370.276	1.77185	0.152024	11.6551	2.1621e-31	6.83797e-30
POLA2	protein_coding	610.513	1.28315	0.110141	11.65	2.29453e-31	7.23998e-30
PIGU	protein_coding	1215.25	1.1297	0.0969727	11.6497	2.30276e-31	7.24917e-30
LIN9	protein_coding	179.09	1.5424	0.132407	11.6489	2.3241e-31	7.29949e-30
CRYBG2	protein_coding	144.102	2.55363	0.219325	11.6431	2.4867e-31	7.79222e-30
MAP2K3	protein_coding	2993.1	-1.26143	0.108357	-11.6414	2.53819e-31	7.93534e-30
WNK4	protein_coding	318.276	3.73381	0.320905	11.6352	2.7282e-31	8.50985e-30
TESMIN	protein_coding	110.943	2.31487	0.199047	11.6298	2.90856e-31	9.05172e-30
LCAT	protein_coding	3645.75	-2.56103	0.220322	-11.624	3.11072e-31	9.63686e-30
FANCE	protein_coding	164.295	1.66076	0.143072	11.6078	3.76146e-31	1.16001e-29
CD302	protein_coding	1420.41	-1.70143	0.146702	-11.5978	4.22662e-31	1.30052e-29
ITPKA	protein_coding	373.633	2.58118	0.222676	11.5917	4.54216e-31	1.39446e-29
KIF24	protein_coding	99.4957	1.88056	0.162377	11.5815	5.11414e-31	1.56654e-29
SLC38A2	protein_coding	11874.1	-1.64004	0.141631	-11.5797	5.22469e-31	1.59636e-29
ABCC5	protein_coding	688.554	1.08633	0.0939007	11.5689	5.92333e-31	1.79424e-29
CCDC28B	protein_coding	252.366	2.37697	0.205607	11.5608	6.51288e-31	1.96845e-29
GHR	protein_coding	3679.03	-2.47477	0.214141	-11.5567	6.82461e-31	2.0581e-29
ZNF696	protein_coding	335.107	1.20535	0.104369	11.549	7.47104e-31	2.24807e-29
BCO2	protein_coding	554.316	-3.11231	0.269597	-11.5443	7.88439e-31	2.36202e-29
RASGRF2	protein_coding	281.069	1.87102	0.162149	11.5389	8.40205e-31	2.51159e-29
HAUS5	protein_coding	609.172	1.0065	0.0872746	11.5326	9.03669e-31	2.6895e-29
COL4A1	protein_coding	9179.06	1.78293	0.154624	11.5307	9.23503e-31	2.74254e-29
TSSK6	protein_coding	84.6668	1.38074	0.11983	11.5225	1.01602e-30	3.00421e-29
HSF4	protein_coding	436.923	1.7961	0.155917	11.5195	1.05172e-30	3.10303e-29
SLC39A14	protein_coding	17686.1	-1.65353	0.143782	-11.5002	1.31581e-30	3.87382e-29
ZFP36L1	protein_coding	11089.7	-1.11054	0.0966786	-11.4869	1.53501e-30	4.49971e-29
MAST2	protein_coding	1275.27	1.05215	0.0916892	11.4752	1.75718e-30	5.12893e-29
C8orf33	protein_coding	2383.99	1.278	0.111589	11.4527	2.27898e-30	6.62362e-29
OTUB2	protein_coding	107.508	1.57138	0.137212	11.4522	2.2922e-30	6.64787e-29
FOXO1	protein_coding	1579.29	-1.73368	0.151401	-11.4509	2.32756e-30	6.73609e-29
IRAK1	protein_coding	5179.52	1.2985	0.113441	11.4465	2.44972e-30	7.07461e-29
KPNA2	protein_coding	2498.38	1.413	0.123528	11.4387	2.67852e-30	7.71902e-29
PANK1	protein_coding	2531.1	-1.5925	0.139227	-11.4381	2.69751e-30	7.75733e-29
MRO	protein_coding	143.146	-2.33476	0.204312	-11.4275	3.04909e-30	8.74993e-29
RNF157	protein_coding	743.167	2.55622	0.223807	11.4215	3.26401e-30	9.3274e-29
ARHGAP33	protein_coding	254.602	1.54746	0.135621	11.4102	3.71669e-30	1.05988e-28
ENAH	protein_coding	3199.94	1.55528	0.136744	11.3737	5.65597e-30	1.60284e-28
SLC35D1	protein_coding	3761.19	-1.37387	0.120822	-11.371	5.83104e-30	1.64902e-28
LAMA4	protein_coding	1101.03	1.52498	0.134168	11.3662	6.16238e-30	1.73553e-28
TRIM59	protein_coding	92.2089	1.94104	0.170811	11.3637	6.34212e-30	1.78246e-28
NCOR1	protein_coding	2775.48	-1.15076	0.101275	-11.3628	6.40687e-30	1.79696e-28
PLK3	protein_coding	396.832	-1.60665	0.141476	-11.3563	6.89848e-30	1.93087e-28
AHSA2	protein_coding	923.371	1.34796	0.118892	11.3378	8.52938e-30	2.37759e-28
EGR2	protein_coding	205.38	-2.53834	0.224018	-11.3309	9.22211e-30	2.56544e-28
NMB	protein_coding	206.985	2.18351	0.192714	11.3303	9.28964e-30	2.57896e-28
ATAD5	protein_coding	131.557	1.63793	0.144615	11.3261	9.74337e-30	2.69943e-28
ZKSCAN3	protein_coding	332.954	1.41781	0.125197	11.3246	9.91362e-30	2.74102e-28
MAP3K9	protein_coding	265.441	1.30825	0.115625	11.3146	1.11118e-29	3.0599e-28
NOL12	protein_coding	168.582	1.15525	0.102109	11.314	1.11932e-29	3.0761e-28
GPSM2	protein_coding	217.967	1.58849	0.140415	11.3128	1.13413e-29	3.11054e-28
ELFN2	protein_coding	300.521	3.70967	0.328087	11.307	1.21183e-29	3.31031e-28
RPS6KL1	protein_coding	234.705	2.01624	0.178386	11.3027	1.27304e-29	3.47055e-28
ATAD2	protein_coding	2064.23	1.69754	0.150279	11.2959	1.37448e-29	3.73963e-28
TCOF1	protein_coding	1719.81	1.06056	0.0938996	11.2946	1.39513e-29	3.78825e-28
SULT1C2	protein_coding	762.87	3.58437	0.317484	11.2899	1.47198e-29	3.98899e-28
IGSF3	protein_coding	634.883	2.55176	0.226207	11.2806	1.6354e-29	4.42304e-28
LARP1B	protein_coding	1314	-1.12854	0.100117	-11.2722	1.8001e-29	4.84925e-28
FLAD1	protein_coding	2407.98	1.01918	0.0904239	11.2712	1.82117e-29	4.89632e-28
CDCA4	protein_coding	282.759	1.40297	0.124501	11.2688	1.87198e-29	5.02303e-28
ADAM15	protein_coding	3680.17	1.32444	0.117651	11.2574	2.13065e-29	5.69469e-28
PAQR4	protein_coding	305.809	1.99776	0.177528	11.2532	2.2331e-29	5.95681e-28
TRAF2	protein_coding	1200.8	1.16531	0.103636	11.2443	2.47175e-29	6.56773e-28
EPPK1	protein_coding	459.441	3.37616	0.30059	11.2317	2.84783e-29	7.49397e-28
GPR158	protein_coding	138.972	3.4006	0.303242	11.2141	3.47587e-29	9.11146e-28
YEATS2	protein_coding	691.925	1.04275	0.0929937	11.2131	3.51549e-29	9.19762e-28
PXDC1	protein_coding	5438.76	-1.35392	0.120824	-11.2057	3.82409e-29	9.98585e-28
PAMR1	protein_coding	196.618	-2.16487	0.193293	-11.1999	4.0803e-29	1.06345e-27
COA6	protein_coding	1480.11	1.2685	0.113282	11.1977	4.18232e-29	1.08796e-27
AKR1C3	protein_coding	16190.6	1.59655	0.142658	11.1914	4.49046e-29	1.1659e-27
RFX5	protein_coding	1494.69	1.15868	0.103594	11.1848	4.83739e-29	1.24926e-27
MCM7	protein_coding	3755.98	1.48614	0.132891	11.1831	4.9314e-29	1.2707e-27
N4BP2L1	protein_coding	1262.94	-1.46119	0.130721	-11.1779	5.23123e-29	1.34541e-27
MPC1	protein_coding	4229.69	-1.53389	0.137326	-11.1698	5.73369e-29	1.47186e-27
MESP1	protein_coding	125.792	1.99021	0.178208	11.1679	5.85547e-29	1.5003e-27
DTYMK	protein_coding	1167.44	1.31745	0.118056	11.1595	6.43175e-29	1.64178e-27
CKS1B	protein_coding	1082.35	1.23815	0.111005	11.154	6.84433e-29	1.74383e-27
ARHGEF11	protein_coding	2321.1	1.1306	0.101375	11.1526	6.95154e-29	1.76784e-27
ACLY	protein_coding	4203.96	1.04049	0.0933011	11.1519	7.00843e-29	1.77899e-27
MCM5	protein_coding	2525.33	1.3966	0.125241	11.1513	7.05598e-29	1.78773e-27
BICDL1	protein_coding	550.913	2.27195	0.203814	11.1472	7.39161e-29	1.8693e-27
PSMC3IP	protein_coding	79.1027	1.60545	0.144028	11.1468	7.42264e-29	1.87367e-27
NDRG2	protein_coding	9954.77	-1.51617	0.136157	-11.1354	8.43405e-29	2.12504e-27
CD200	protein_coding	140.369	1.87358	0.168282	11.1336	8.60829e-29	2.16494e-27
CCNE2	protein_coding	94.6636	2.09815	0.188464	11.1329	8.67603e-29	2.17795e-27
NETO2	protein_coding	134.063	2.28364	0.205133	11.1325	8.71858e-29	2.18461e-27
SUCO	protein_coding	1593.79	1.11395	0.100164	11.1213	9.87903e-29	2.47085e-27
FAM222A	protein_coding	632.863	1.73029	0.155607	11.1196	1.00693e-28	2.51383e-27
FOXD2	protein_coding	109.699	2.09929	0.188887	11.114	1.07229e-28	2.6721e-27
CDC25A	protein_coding	179.738	2.14276	0.193007	11.102	1.22695e-28	3.05193e-27
NAA40	protein_coding	503.442	1.08154	0.0974225	11.1016	1.23252e-28	3.0602e-27
ALDH2	protein_coding	43790.6	-1.69173	0.152595	-11.0864	1.4601e-28	3.60554e-27
GSTZ1	protein_coding	2542.6	-2.02652	0.182848	-11.0831	1.51538e-28	3.7353e-27
RASGEF1B	protein_coding	1048.34	-1.84306	0.166319	-11.0815	1.54261e-28	3.79554e-27
TLDC2	protein_coding	118.96	2.35786	0.212882	11.0759	1.6424e-28	4.03378e-27
ID2	protein_coding	8077.77	-1.459	0.131736	-11.0752	1.65505e-28	4.05755e-27
SLC7A6	protein_coding	168.338	1.81014	0.163499	11.0713	1.72965e-28	4.23283e-27
SERTAD1	protein_coding	868.744	-1.55779	0.140784	-11.0651	1.85272e-28	4.52589e-27
CENPO	protein_coding	279.936	1.55852	0.141	11.0533	2.11195e-28	5.1499e-27
ACADSB	protein_coding	12467.1	-1.77915	0.160989	-11.0514	2.15883e-28	5.25481e-27
NCAPD2	protein_coding	1255.17	1.41383	0.127944	11.0503	2.18373e-28	5.29652e-27
KDM8	protein_coding	1331.41	-2.42369	0.219331	-11.0504	2.18315e-28	5.29652e-27
LIG1	protein_coding	1304.74	1.12861	0.102179	11.0454	2.30695e-28	5.57553e-27
THEM5	protein_coding	149.078	1.74258	0.158002	11.0288	2.77409e-28	6.65733e-27
C1R	protein_coding	65870.8	-1.77329	0.160873	-11.0229	2.96305e-28	7.0983e-27
IQCE	protein_coding	648.643	1.15641	0.105004	11.013	3.30623e-28	7.90654e-27
TRIM65	protein_coding	645.044	1.03671	0.0942177	11.0034	3.68095e-28	8.78723e-27
CRIP3	protein_coding	336.594	2.13677	0.194237	11.0008	3.78583e-28	9.0218e-27
SSR2	protein_coding	12093	1.20211	0.1094	10.9883	4.35257e-28	1.03362e-26
ZNF605	protein_coding	413.973	1.1085	0.101027	10.9723	5.19533e-28	1.22947e-26
SMG9	protein_coding	969.106	1.17818	0.107391	10.9709	5.27291e-28	1.24567e-26
N4BP3	protein_coding	84.6762	1.99909	0.18228	10.9671	5.49803e-28	1.2966e-26
RAB24	protein_coding	393.009	1.06588	0.0973876	10.9447	7.04624e-28	1.6503e-26
GPAA1	protein_coding	10398.9	1.4214	0.129918	10.9408	7.35535e-28	1.71974e-26
FBF1	protein_coding	128.012	1.43142	0.130839	10.9402	7.39965e-28	1.72713e-26
CYP17A1	protein_coding	3247.21	4.20372	0.384292	10.9389	7.51425e-28	1.75088e-26
SNRPE	protein_coding	2494.18	1.18619	0.108472	10.9354	7.80418e-28	1.81225e-26
MTHFD1L	protein_coding	518.93	1.52494	0.139486	10.9326	8.05483e-28	1.86727e-26
SOGA1	protein_coding	742.205	1.48617	0.13608	10.9213	9.12004e-28	2.10704e-26
FERMT2	protein_coding	2675.09	-1.08377	0.0993147	-10.9124	1.00523e-27	2.3185e-26
AGL	protein_coding	1867.03	-1.50901	0.138361	-10.9063	1.07503e-27	2.4753e-26
FXN	protein_coding	636.039	-1.19594	0.109699	-10.902	1.12777e-27	2.59235e-26
TAPT1	protein_coding	1613.59	-1.0456	0.0959182	-10.901	1.14012e-27	2.61634e-26
PDGFA	protein_coding	1054.39	1.96551	0.180366	10.8974	1.18645e-27	2.71806e-26
UBD	protein_coding	3321.52	2.57366	0.236196	10.8963	1.20028e-27	2.74514e-26
IER2	protein_coding	3369.81	-1.33493	0.122517	-10.8959	1.20591e-27	2.7534e-26
FBXL19	protein_coding	374.816	1.0719	0.098419	10.8912	1.26976e-27	2.87987e-26
CNIH4	protein_coding	1616.21	1.08611	0.0997718	10.886	1.3447e-27	3.04478e-26
FAHD2A	protein_coding	1604.94	-1.15655	0.10625	-10.8852	1.35561e-27	3.0644e-26
BCKDHB	protein_coding	1579.88	-1.52717	0.140445	-10.8738	1.53671e-27	3.46803e-26
TMEM132A	protein_coding	591.768	2.68796	0.247415	10.8642	1.70696e-27	3.84588e-26
SCN4A	protein_coding	79.249	2.11872	0.195022	10.864	1.71035e-27	3.84716e-26
NDOR1	protein_coding	366.809	1.01057	0.0930537	10.86	1.78652e-27	4.01187e-26
TLX1	protein_coding	155.199	2.84615	0.262254	10.8526	1.93787e-27	4.33943e-26
ALDH3A1	protein_coding	4710.87	4.88596	0.450439	10.8471	2.05872e-27	4.57788e-26
KRTCAP2	protein_coding	1403.49	1.17054	0.107912	10.8472	2.05725e-27	4.57788e-26
LDLR	protein_coding	5173.66	-1.53115	0.141276	-10.838	2.27287e-27	5.04585e-26
GATS	protein_coding	314.575	1.56156	0.144153	10.8326	2.41104e-27	5.34388e-26
ACAA1	protein_coding	10867.2	-1.5419	0.142429	-10.8258	2.59899e-27	5.74178e-26
TCF3	protein_coding	1490.11	1.03679	0.0958395	10.818	2.82994e-27	6.23181e-26
ZC3H3	protein_coding	1561.63	1.12523	0.104057	10.8136	2.96824e-27	6.52581e-26
CBX8	protein_coding	491.901	1.18597	0.109728	10.8083	3.14495e-27	6.9032e-26
JCAD	protein_coding	972.554	1.75453	0.16239	10.8044	3.28016e-27	7.1884e-26
GNE	protein_coding	4180.72	-1.58365	0.146643	-10.7994	3.46633e-27	7.5842e-26
FOSB	protein_coding	1993.27	-3.22427	0.298582	-10.7986	3.4955e-27	7.63577e-26
COL7A1	protein_coding	759.587	3.21526	0.297834	10.7954	3.61699e-27	7.87591e-26
KLC2	protein_coding	619.621	1.1356	0.105242	10.7904	3.82126e-27	8.2942e-26
CYR61	protein_coding	3089.14	-1.99621	0.185231	-10.7769	4.42665e-27	9.56254e-26
GINS2	protein_coding	366.049	1.77687	0.16505	10.7656	5.00312e-27	1.07907e-25
PLPPR2	protein_coding	1252.06	1.17286	0.108961	10.764	5.09216e-27	1.09654e-25
GOLGA8B	protein_coding	835.23	1.62329	0.150854	10.7607	5.27862e-27	1.1349e-25
PEG10	protein_coding	8069.19	4.58161	0.425849	10.7588	5.38823e-27	1.15664e-25
EFNA3	protein_coding	137.07	2.12089	0.197187	10.7558	5.56674e-27	1.19309e-25
RBP7	protein_coding	503.878	1.99531	0.185529	10.7547	5.63038e-27	1.20483e-25
LPL	protein_coding	158.901	2.07253	0.192784	10.7505	5.89209e-27	1.25886e-25
PYGB	protein_coding	3450.55	1.42288	0.132402	10.7467	6.14471e-27	1.31077e-25
POLE2	protein_coding	193.869	1.6069	0.149547	10.7451	6.24885e-27	1.33091e-25
DNMT3A	protein_coding	1071.95	1.29784	0.120822	10.7418	6.4775e-27	1.37745e-25
PLOD3	protein_coding	5806.31	1.02994	0.0960868	10.7189	8.29862e-27	1.76197e-25
SNRPB	protein_coding	6289.81	1.1558	0.107878	10.7139	8.75732e-27	1.85647e-25
IL1RN	protein_coding	3320.64	-2.14268	0.200021	-10.7123	8.91184e-27	1.88629e-25
PABPC1L	protein_coding	949.838	1.69021	0.157798	10.7112	9.01491e-27	1.90515e-25
CACYBP	protein_coding	2408.12	1.04642	0.0977857	10.7012	1.00503e-26	2.12067e-25
SOCS2	protein_coding	1087.34	-2.19819	0.205431	-10.7004	1.01363e-26	2.13553e-25
ARHGAP39	protein_coding	187.162	1.55308	0.145172	10.6982	1.03787e-26	2.18322e-25
LRRC1	protein_coding	449.782	2.32694	0.217663	10.6906	1.12641e-26	2.36217e-25
RBM24	protein_coding	256.665	2.54722	0.238312	10.6886	1.15112e-26	2.40659e-25
H2AFZ	protein_coding	4279.54	1.16477	0.109015	10.6846	1.20207e-26	2.50925e-25
ACYP1	protein_coding	116.553	1.12392	0.105241	10.6795	1.26903e-26	2.6369e-25
LILRB5	protein_coding	358.444	-1.92617	0.180404	-10.677	1.30391e-26	2.70527e-25
SLC38A6	protein_coding	390.071	1.18388	0.110978	10.6677	1.44168e-26	2.98203e-25
MMAA	protein_coding	901.689	-1.18728	0.111385	-10.6593	1.57796e-26	3.25404e-25
MT-ATP6	protein_coding	269382	-1.40485	0.131916	-10.6496	1.75125e-26	3.60594e-25
CD109	protein_coding	571.527	2.45882	0.230903	10.6487	1.76753e-26	3.63397e-25
TYMS	protein_coding	853.253	1.77555	0.16679	10.6454	1.83184e-26	3.76051e-25
BRSK1	protein_coding	111.406	1.7893	0.16814	10.6418	1.90517e-26	3.90516e-25
HMGA1	protein_coding	3605.55	1.71007	0.160745	10.6384	1.97531e-26	4.04287e-25
TLCD1	protein_coding	570.587	1.63117	0.153359	10.6362	2.02101e-26	4.13019e-25
PGM1	protein_coding	8697.66	-1.26723	0.119163	-10.6345	2.05984e-26	4.20324e-25
GINS3	protein_coding	156.77	1.41691	0.133256	10.633	2.09206e-26	4.25625e-25
MROH1	protein_coding	1808.14	1.32835	0.124937	10.6322	2.11062e-26	4.28761e-25
ZNF789	protein_coding	243.974	1.03503	0.0974309	10.6232	2.32465e-26	4.70836e-25
SNCG	protein_coding	860.911	3.13049	0.294811	10.6186	2.44109e-26	4.92955e-25
IVD	protein_coding	8326.73	-1.22714	0.115589	-10.6164	2.50059e-26	5.04224e-25
ADM2	protein_coding	740.405	2.18252	0.205587	10.616	2.50969e-26	5.05312e-25
PODXL	protein_coding	1696.2	1.58776	0.149748	10.6029	2.88788e-26	5.80601e-25
ZBED8	protein_coding	128.748	1.22884	0.115991	10.5942	3.17083e-26	6.35612e-25
DBT	protein_coding	1715.38	-1.12257	0.106012	-10.5891	3.34801e-26	6.68574e-25
MS4A6A	protein_coding	1200.01	-1.80933	0.170934	-10.585	3.4987e-26	6.97233e-25
LAMC1	protein_coding	6218.28	1.379	0.130311	10.5824	3.59481e-26	7.1534e-25
JAG2	protein_coding	524.34	1.68545	0.15949	10.5677	4.20683e-26	8.34691e-25
NPEPL1	protein_coding	433.558	1.17736	0.111421	10.5668	4.24962e-26	8.40734e-25
CCDC71L	protein_coding	1332.26	-1.75676	0.166306	-10.5634	4.40494e-26	8.70198e-25
PDLIM5	protein_coding	4096.17	-1.09131	0.103322	-10.5622	4.45961e-26	8.79723e-25
GADD45B	protein_coding	7603.48	-1.94507	0.184162	-10.5618	4.48158e-26	8.8278e-25
SERPINB9	protein_coding	617.117	-1.60167	0.151687	-10.5591	4.61281e-26	9.07318e-25
ADGRG7	protein_coding	265.679	-2.69798	0.255615	-10.5549	4.8229e-26	9.43648e-25
STXBP6	protein_coding	526.395	1.65409	0.156789	10.5498	5.08959e-26	9.93928e-25
MAFG	protein_coding	873.342	1.27355	0.120931	10.5312	6.20203e-26	1.20771e-24
TUBG1	protein_coding	1577.26	1.07422	0.10201	10.5305	6.24827e-26	1.21498e-24
DNAJC25	protein_coding	1032.88	-1.25986	0.119642	-10.5302	6.26764e-26	1.21537e-24
TP53I3	protein_coding	1390.51	1.83633	0.174386	10.5302	6.26812e-26	1.21537e-24
HRCT1	protein_coding	401.163	2.84426	0.270147	10.5286	6.37812e-26	1.23494e-24
HSPB1	protein_coding	24471.7	1.66047	0.157715	10.5283	6.3993e-26	1.23729e-24
CENPJ	protein_coding	225.767	1.25046	0.118782	10.5274	6.46274e-26	1.24778e-24
ITGA6	protein_coding	2780.18	1.39203	0.132253	10.5255	6.59e-26	1.27056e-24
JUN	protein_coding	7881.05	-1.55858	0.148171	-10.5188	7.07419e-26	1.36006e-24
GNPNAT1	protein_coding	2024.35	-1.09853	0.104476	-10.5147	7.39491e-26	1.41972e-24
IL3RA	protein_coding	294.097	1.26775	0.120584	10.5134	7.49563e-26	1.43703e-24
NFIL3	protein_coding	2408.6	-1.43137	0.136172	-10.5114	7.6513e-26	1.46482e-24
MTHFD2L	protein_coding	410.306	-1.40968	0.134119	-10.5106	7.71773e-26	1.47546e-24
STX1A	protein_coding	100.029	1.57015	0.149503	10.5024	8.41819e-26	1.60712e-24
P4HA2	protein_coding	1541.94	1.44514	0.137637	10.4996	8.67285e-26	1.65342e-24
TSEN54	protein_coding	1196.37	1.03307	0.0983952	10.4992	8.71114e-26	1.6584e-24
B3GNTL1	protein_coding	262.483	1.46927	0.140038	10.492	9.40589e-26	1.78568e-24
IGFBP3	protein_coding	10797.6	-1.97122	0.187995	-10.4855	1.00717e-25	1.90943e-24
COL4A2	protein_coding	10377.7	1.6473	0.157127	10.4839	1.02458e-25	1.93973e-24
SLC6A8	protein_coding	1333.47	2.93434	0.280094	10.4763	1.11004e-25	2.0957e-24
SEZ6L2	protein_coding	1579.22	3.45302	0.329629	10.4755	1.11976e-25	2.11112e-24
ITGA9	protein_coding	663.554	-1.8291	0.174625	-10.4745	1.13174e-25	2.13077e-24
DDIAS	protein_coding	94.4319	1.56165	0.149115	10.4728	1.15194e-25	2.16581e-24
HMGB2	protein_coding	1946.36	1.36802	0.130883	10.4522	1.43102e-25	2.67575e-24
C8orf44	protein_coding	97.3899	1.23062	0.117757	10.4505	1.45731e-25	2.72118e-24
PHF19	protein_coding	527.106	1.4318	0.137094	10.4439	1.56251e-25	2.89777e-24
UGT2B11	protein_coding	1310.66	3.17046	0.303567	10.444	1.56081e-25	2.89777e-24
RIPK4	protein_coding	1176.75	-1.39184	0.133276	-10.4433	1.5728e-25	2.91289e-24
TPM2	protein_coding	2045.65	1.92489	0.184626	10.4259	1.88868e-25	3.4743e-24
NAT1	protein_coding	242.809	-1.30547	0.125234	-10.4243	1.92049e-25	3.52806e-24
MUT	protein_coding	5895.09	-1.34631	0.129164	-10.4232	1.94227e-25	3.56327e-24
WHRN	protein_coding	356.89	1.46531	0.140664	10.417	2.07292e-25	3.78766e-24
ETV4	protein_coding	937.739	3.00547	0.288593	10.4142	2.13483e-25	3.89557e-24
SLC22A11	protein_coding	818.188	4.21194	0.405031	10.3991	2.50397e-25	4.55696e-24
SFRP4	protein_coding	227.529	2.98998	0.287638	10.3949	2.61448e-25	4.74541e-24
FAM83H	protein_coding	4551.61	1.46836	0.141257	10.395	2.61302e-25	4.74541e-24
SOCS3	protein_coding	2351.12	-2.31545	0.222928	-10.3866	2.85446e-25	5.16722e-24
DNMT3B	protein_coding	125.54	1.69539	0.163313	10.3812	3.01818e-25	5.45634e-24
ARID3A	protein_coding	785.035	2.51672	0.242445	10.3806	3.03813e-25	5.47788e-24
RIPOR3	protein_coding	150.409	-2.43358	0.234596	-10.3735	3.27292e-25	5.89341e-24
PSPH	protein_coding	1000.55	1.45346	0.140171	10.3692	3.42244e-25	6.13833e-24
CTBS	protein_coding	1221.62	-1.0711	0.103319	-10.367	3.50495e-25	6.27804e-24
SYNE1	protein_coding	1174.49	-1.30916	0.126298	-10.3657	3.5531e-25	6.34761e-24
CCL14	protein_coding	174.49	-1.88009	0.181686	-10.348	4.27253e-25	7.57332e-24
HPS5	protein_coding	1645.33	-1.53042	0.14793	-10.3456	4.38283e-25	7.75875e-24
IL6ST	protein_coding	10193	-1.01382	0.0980034	-10.3447	4.42304e-25	7.81978e-24
ACAT1	protein_coding	15471.4	-1.40802	0.136207	-10.3374	4.77455e-25	8.41778e-24
TSC22D2	protein_coding	1199.07	-1.01214	0.0979114	-10.3373	4.77981e-25	8.41778e-24
ACAA2	protein_coding	16319.1	-1.59744	0.154573	-10.3345	4.91786e-25	8.64971e-24
SOWAHC	protein_coding	1954.84	-1.18465	0.114674	-10.3305	5.12838e-25	8.99677e-24
NSD2	protein_coding	1469.66	1.11117	0.107586	10.3282	5.25358e-25	9.20457e-24
CHML	protein_coding	587.391	1.71784	0.166623	10.3097	6.36783e-25	1.11139e-23
SMYD3	protein_coding	304.641	1.50528	0.14604	10.3073	6.5296e-25	1.13817e-23
RMI2	protein_coding	295.722	1.93121	0.187373	10.3067	6.56904e-25	1.14358e-23
C4orf46	protein_coding	156.288	1.15646	0.112222	10.3051	6.68274e-25	1.16189e-23
EME2	protein_coding	314.739	1.20497	0.116947	10.3036	6.7867e-25	1.17846e-23
SPRYD4	protein_coding	3013.25	-1.32368	0.128504	-10.3007	6.9924e-25	1.21264e-23
CD163	protein_coding	1671.95	-1.97964	0.192231	-10.2983	7.1752e-25	1.24276e-23
SLC50A1	protein_coding	3580.61	1.22721	0.119213	10.2943	7.47429e-25	1.29292e-23
MBNL2	protein_coding	2721.22	-1.37626	0.133803	-10.2857	8.17089e-25	1.41163e-23
BCL9	protein_coding	880.328	1.3361	0.130063	10.2727	9.35186e-25	1.61157e-23
ARL16	protein_coding	923.774	1.17173	0.114156	10.2643	1.02047e-24	1.7541e-23
SH3PXD2B	protein_coding	600.233	1.31275	0.127992	10.2565	1.10643e-24	1.89946e-23
ANKS3	protein_coding	496.864	1.0686	0.104295	10.246	1.23393e-24	2.11303e-23
ZGRF1	protein_coding	93.8539	1.34615	0.131431	10.2423	1.28135e-24	2.19147e-23
DHODH	protein_coding	3080.31	-1.77038	0.172895	-10.2396	1.31731e-24	2.24734e-23
USP38	protein_coding	1232.96	-1.01256	0.0989418	-10.2339	1.3972e-24	2.37768e-23
H2AFX	protein_coding	1188.87	1.4402	0.140728	10.234	1.39691e-24	2.37768e-23
ALKBH6	protein_coding	123.926	1.21639	0.118862	10.2336	1.40237e-24	2.38351e-23
JUNB	protein_coding	5416.46	-1.54743	0.151325	-10.2259	1.51835e-24	2.57742e-23
ZCCHC24	protein_coding	1895.83	-1.10962	0.108581	-10.2193	1.6256e-24	2.75604e-23
BOP1	protein_coding	3718.1	1.67445	0.163871	10.2181	1.64529e-24	2.78596e-23
SLC26A2	protein_coding	402.722	1.21489	0.118897	10.2179	1.64813e-24	2.7873e-23
MLYCD	protein_coding	1418.44	-1.28112	0.125446	-10.2126	1.74166e-24	2.93819e-23
CMTM6	protein_coding	4050.95	-1.03498	0.101351	-10.2119	1.75418e-24	2.95565e-23
CCDC163	protein_coding	97.7001	1.42839	0.139878	10.2117	1.75712e-24	2.95696e-23
ADRA1A	protein_coding	506.326	-3.12511	0.306119	-10.2088	1.81086e-24	3.04363e-23
CENPP	protein_coding	123.951	1.09202	0.106995	10.2063	1.85895e-24	3.1206e-23
CAT	protein_coding	19055.7	-1.43631	0.14082	-10.1996	1.99035e-24	3.32482e-23
RNF125	protein_coding	606.007	-1.89204	0.185784	-10.1841	2.33503e-24	3.8863e-23
CEP152	protein_coding	113.43	1.37293	0.134929	10.1752	2.55827e-24	4.23715e-23
KLF10	protein_coding	2698.73	-1.45537	0.143036	-10.1749	2.56744e-24	4.24718e-23
NEU1	protein_coding	5441.78	1.1486	0.113012	10.1635	2.88417e-24	4.76535e-23
ANTXR2	protein_coding	1498.07	-1.26754	0.124734	-10.162	2.93113e-24	4.83708e-23
ARL5B	protein_coding	2236.95	-1.05186	0.103516	-10.1613	2.95172e-24	4.86515e-23
KIAA1614	protein_coding	86.4395	1.84441	0.181548	10.1593	3.01096e-24	4.95084e-23
PLPBP	protein_coding	2238.59	-1.09081	0.107577	-10.1399	3.67599e-24	6.02252e-23
CEP72	protein_coding	245.165	1.36016	0.134232	10.1329	3.94704e-24	6.4511e-23
44444	protein_coding	343.942	1.99204	0.196941	10.1149	4.74452e-24	7.71748e-23
ZNF341	protein_coding	248.042	1.07626	0.106428	10.1126	4.85972e-24	7.89546e-23
PPP2R3B	protein_coding	413.983	1.03855	0.102751	10.1075	5.11816e-24	8.30543e-23
EML6	protein_coding	113.872	1.99921	0.197834	10.1055	5.22268e-24	8.4549e-23
SAC3D1	protein_coding	712.819	1.28481	0.12718	10.1023	5.39601e-24	8.72516e-23
MCM8	protein_coding	352.882	1.34359	0.133036	10.0994	5.55725e-24	8.97522e-23
CBFA2T3	protein_coding	188.697	-1.94941	0.193162	-10.0921	5.98767e-24	9.65892e-23
SPARCL1	protein_coding	6620.2	2.73322	0.270954	10.0874	6.28206e-24	1.01218e-22
NKD1	protein_coding	1479.65	3.8578	0.382491	10.086	6.37234e-24	1.02552e-22
POU5F1	protein_coding	85.1914	1.99406	0.197725	10.085	6.43591e-24	1.03453e-22
SLC31A1	protein_coding	5380.22	-1.05559	0.104834	-10.0692	7.56232e-24	1.2113e-22
KDM6B	protein_coding	1172.64	-1.03956	0.103257	-10.0677	7.67559e-24	1.228e-22
MAPK12	protein_coding	472.472	2.19793	0.218527	10.0579	8.47651e-24	1.35297e-22
SLC52A2	protein_coding	1303.41	1.42021	0.14125	10.0546	8.76786e-24	1.39783e-22
TRAF5	protein_coding	300.459	1.48699	0.147907	10.0536	8.86131e-24	1.41108e-22
CCDC137	protein_coding	980.735	1.00124	0.0996052	10.0521	8.99531e-24	1.43075e-22
LMNB2	protein_coding	1161.43	1.30766	0.130179	10.045	9.66022e-24	1.53293e-22
ATF3	protein_coding	2231.99	-1.74675	0.173921	-10.0434	9.82408e-24	1.55712e-22
ZSCAN16	protein_coding	162.129	1.10637	0.110165	10.0428	9.87851e-24	1.56392e-22
NEB	protein_coding	913.047	2.91617	0.290463	10.0397	1.01965e-23	1.61053e-22
SDC4	protein_coding	20753.6	-1.28162	0.127726	-10.0341	1.07888e-23	1.70212e-22
DNM3	protein_coding	72.9782	1.5568	0.155356	10.0208	1.23483e-23	1.94141e-22
APOF	protein_coding	5492.76	-2.87212	0.286719	-10.0172	1.28103e-23	2.01172e-22
KLF11	protein_coding	1528.45	-1.24748	0.124637	-10.0089	1.39298e-23	2.18501e-22
P2RY13	protein_coding	108.58	-1.91788	0.191644	-10.0075	1.41281e-23	2.21357e-22
MSRA	protein_coding	1496.29	-1.39179	0.139365	-9.98661	1.74454e-23	2.72705e-22
HIVEP1	protein_coding	810.6	-1.16688	0.116907	-9.98126	1.84109e-23	2.87467e-22
PCNA	protein_coding	2899.13	1.05305	0.105556	9.97625	1.93643e-23	3.01663e-22
PAFAH1B3	protein_coding	800.069	1.98336	0.198884	9.97245	2.01198e-23	3.12717e-22
CYB561D1	protein_coding	233.386	1.19755	0.120176	9.96493	2.17023e-23	3.36547e-22
PTPN3	protein_coding	2190.17	-1.03193	0.103811	-9.94047	2.77519e-23	4.29382e-22
MSX1	protein_coding	91.5126	1.86592	0.18773	9.93939	2.80553e-23	4.33585e-22
MASP1	protein_coding	6100.65	-1.62636	0.16373	-9.93318	2.98587e-23	4.60934e-22
ARFGEF3	protein_coding	367.156	2.96503	0.298664	9.92764	3.15651e-23	4.86174e-22
IDUA	protein_coding	750.697	1.23222	0.124243	9.9178	3.48348e-23	5.35929e-22
ANKRD13B	protein_coding	103.828	1.72351	0.1739	9.91093	3.73157e-23	5.7345e-22
L3MBTL1	protein_coding	109.674	1.39236	0.140528	9.90808	3.83946e-23	5.88703e-22
INCENP	protein_coding	386.451	1.25503	0.126694	9.90596	3.92185e-23	6.0066e-22
NSUN6	protein_coding	1152.06	-1.14493	0.115589	-9.90516	3.95354e-23	6.04834e-22
ALDH6A1	protein_coding	11951.2	-1.7609	0.177793	-9.90421	3.99101e-23	6.09882e-22
FAM212A	protein_coding	66.9518	1.48069	0.149528	9.90243	4.06261e-23	6.20129e-22
MT-ND4	protein_coding	686966	-1.30154	0.1315	-9.8977	4.25947e-23	6.48725e-22
IGFALS	protein_coding	2425.62	-3.17763	0.321116	-9.8956	4.35008e-23	6.61785e-22
ACSM3	protein_coding	1574.68	-2.06773	0.209012	-9.89286	4.47053e-23	6.79352e-22
EEF1A2	protein_coding	3980.82	3.95974	0.401205	9.86962	5.63751e-23	8.55734e-22
PSMD4	protein_coding	11656.2	1.07638	0.109126	9.86366	5.98275e-23	9.05115e-22
MPZ	protein_coding	668.595	2.98133	0.302285	9.86263	6.04435e-23	9.1342e-22
GPSM1	protein_coding	591.155	2.0227	0.205183	9.85804	6.32749e-23	9.55149e-22
DUOX1	protein_coding	160.515	2.29183	0.232489	9.8578	6.34252e-23	9.5636e-22
MAT1A	protein_coding	49591.5	-1.82641	0.185493	-9.84623	7.11618e-23	1.07183e-21
FGD1	protein_coding	324.739	1.37448	0.139786	9.83279	8.13365e-23	1.21969e-21
SBF1	protein_coding	2154.49	1.01655	0.103454	9.82602	8.69881e-23	1.2973e-21
PBLD	protein_coding	5326.48	-1.7743	0.180629	-9.82288	8.97417e-23	1.33545e-21
C20orf96	protein_coding	221.883	1.01602	0.103483	9.81821	9.40004e-23	1.39425e-21
ACSL1	protein_coding	30859.5	-1.84602	0.188046	-9.81684	9.52848e-23	1.41177e-21
NR4A1	protein_coding	1589.4	-2.14876	0.218889	-9.81666	9.54545e-23	1.41275e-21
TJP2	protein_coding	3024.89	-1.05047	0.107024	-9.81531	9.67361e-23	1.43016e-21
LINGO1	protein_coding	333.32	2.55416	0.260324	9.81147	1.0049e-22	1.48405e-21
DLC1	protein_coding	1670.64	-1.27241	0.12983	-9.80062	1.11894e-22	1.65068e-21
DNA2	protein_coding	164.79	1.36818	0.139611	9.79994	1.12658e-22	1.66015e-21
C1QTNF3	protein_coding	490.754	2.80833	0.286834	9.79078	1.23338e-22	1.81361e-21
SLC9B2	protein_coding	1299.39	-1.45068	0.148206	-9.78826	1.26454e-22	1.85744e-21
TMEM81	protein_coding	150.899	1.0347	0.105815	9.77839	1.39407e-22	2.0411e-21
PKN3	protein_coding	460.548	1.42225	0.145482	9.77618	1.42485e-22	2.08392e-21
ATAT1	protein_coding	301.073	1.07528	0.110032	9.77242	1.4788e-22	2.1605e-21
CPXM1	protein_coding	138.048	2.39894	0.24562	9.76687	1.562e-22	2.27962e-21
RHPN1	protein_coding	323.965	1.87718	0.192329	9.76029	1.66673e-22	2.42726e-21
MCAM	protein_coding	2372.66	1.35693	0.139065	9.75752	1.71294e-22	2.4919e-21
AKR1B10	protein_coding	25651.5	3.62045	0.371443	9.74698	1.90044e-22	2.75877e-21
CYP2C8	protein_coding	21730.2	-2.68453	0.27551	-9.74385	1.95983e-22	2.84196e-21
INMT	protein_coding	622.883	-2.44858	0.251414	-9.73924	2.05091e-22	2.96773e-21
GRAMD1A	protein_coding	2002.8	1.44259	0.148267	9.72966	2.25346e-22	3.25046e-21
IRF8	protein_coding	869.329	-1.56863	0.161263	-9.72714	2.31007e-22	3.3286e-21
CYP4V2	protein_coding	4832.92	-1.43854	0.147968	-9.72195	2.43089e-22	3.49531e-21
STK39	protein_coding	501.108	2.0094	0.20671	9.72084	2.45753e-22	3.52988e-21
PRIM1	protein_coding	364.972	1.27719	0.131481	9.7139	2.63071e-22	3.77069e-21
EPM2A	protein_coding	253.3	-1.03185	0.106275	-9.70928	2.75265e-22	3.93306e-21
PRRX1	protein_coding	128.127	2.29674	0.236547	9.70946	2.74794e-22	3.93306e-21
CBR4	protein_coding	1506.62	-1.19492	0.123069	-9.70933	2.75126e-22	3.93306e-21
ADK	protein_coding	2454.82	-1.12271	0.115651	-9.70774	2.79469e-22	3.98894e-21
GNAL	protein_coding	256.838	2.02955	0.209103	9.70597	2.84346e-22	4.05431e-21
CRYGS	protein_coding	75.5699	1.29972	0.133929	9.70451	2.88449e-22	4.10422e-21
SPIRE2	protein_coding	785.919	1.28512	0.132578	9.69332	3.21902e-22	4.57068e-21
RMDN2	protein_coding	496.121	-1.16532	0.120221	-9.69316	3.22383e-22	4.57274e-21
ETFRF1	protein_coding	1264.64	-1.04142	0.107512	-9.68656	3.43915e-22	4.86297e-21
PLA2G6	protein_coding	655.599	1.32127	0.136462	9.68231	3.58522e-22	5.05903e-21
HMGCL	protein_coding	8165.93	-1.29001	0.133401	-9.67013	4.03847e-22	5.6927e-21
QRICH2	protein_coding	217.203	1.45904	0.150967	9.66462	4.26185e-22	5.99518e-21
RHOB	protein_coding	27752.3	-1.4845	0.153634	-9.66258	4.34783e-22	6.09725e-21
EPB41L4B	protein_coding	2765.11	-1.58726	0.164358	-9.65729	4.57831e-22	6.40728e-21
TMEM150B	protein_coding	467.682	2.23151	0.231097	9.65617	4.62849e-22	6.47087e-21
ZNF581	protein_coding	585.762	1.22366	0.12703	9.63284	5.81e-22	8.073e-21
MEX3A	protein_coding	279.735	1.87328	0.194789	9.61696	6.78047e-22	9.41187e-21
NCAPG2	protein_coding	532.618	1.23023	0.12794	9.61567	6.86621e-22	9.52119e-21
KLF6	protein_coding	6634.52	-1.34666	0.140181	-9.60658	7.50011e-22	1.03791e-20
KCNN3	protein_coding	148.464	1.50153	0.156377	9.60198	7.84198e-22	1.08412e-20
TMEM164	protein_coding	683.448	1.35065	0.140784	9.5938	8.48959e-22	1.17009e-20
TRIM16L	protein_coding	1116.55	2.41956	0.252258	9.59161	8.672e-22	1.19402e-20
PCBP4	protein_coding	1120.67	1.09671	0.114353	9.59058	8.75898e-22	1.20478e-20
DSTYK	protein_coding	508.527	1.01872	0.106241	9.58877	8.91396e-22	1.22486e-20
C6orf48	protein_coding	2693.99	1.19586	0.124769	9.58454	9.28723e-22	1.27487e-20
YJEFN3	protein_coding	83.0694	1.77124	0.185018	9.57332	1.03523e-21	1.41537e-20
GNA14	protein_coding	116.81	-1.76536	0.184628	-9.5617	1.15836e-21	1.57739e-20
SCIMP	protein_coding	131.223	-1.65687	0.173405	-9.55492	1.23681e-21	1.68253e-20
F2RL3	protein_coding	183.772	2.31703	0.242746	9.54508	1.36005e-21	1.84467e-20
MNS1	protein_coding	242.115	2.68202	0.281072	9.54209	1.39976e-21	1.89664e-20
DNMT1	protein_coding	1675.24	1.16296	0.121969	9.53487	1.5008e-21	2.03152e-20
PLIN2	protein_coding	18574.9	-1.66438	0.174669	-9.52875	1.59192e-21	2.1506e-20
PDLIM7	protein_coding	926.557	1.25157	0.131444	9.52169	1.7039e-21	2.29959e-20
TLR4	protein_coding	398.299	-1.48224	0.155955	-9.50429	2.01409e-21	2.69686e-20
NRM	protein_coding	586.162	1.47441	0.155213	9.49924	2.11435e-21	2.82833e-20
DAPK2	protein_coding	540.348	1.60471	0.168936	9.49897	2.11973e-21	2.83275e-20
CCDC25	protein_coding	1568.77	-1.00769	0.106123	-9.49548	2.192e-21	2.9236e-20
BDH2	protein_coding	1229.74	-1.31425	0.13848	-9.49056	2.29797e-21	3.05895e-20
ZNF572	protein_coding	85.5467	1.39746	0.147269	9.48912	2.33003e-21	3.0986e-20
CLCN2	protein_coding	311.891	1.03104	0.108713	9.4841	2.44492e-21	3.2436e-20
PPP1R3B	protein_coding	4629.76	-1.66949	0.176032	-9.48404	2.44621e-21	3.2436e-20
FAM46A	protein_coding	1391	-1.40945	0.148717	-9.4774	2.60694e-21	3.45337e-20
SIPA1L3	protein_coding	1161.18	1.17289	0.12386	9.46953	2.81118e-21	3.71671e-20
BCAS4	protein_coding	193.367	1.70377	0.179925	9.46932	2.81662e-21	3.72028e-20
DUSP1	protein_coding	12466.8	-1.6747	0.176932	-9.46522	2.92941e-21	3.85432e-20
GALNT10	protein_coding	879.351	1.03114	0.108989	9.46098	3.05059e-21	4.00603e-20
CPT2	protein_coding	3142.11	-1.20238	0.127241	-9.4496	3.40141e-21	4.44531e-20
PROS1	protein_coding	9342.96	-1.22987	0.130228	-9.44399	3.58833e-21	4.68063e-20
EDNRB	protein_coding	1133.47	-1.45856	0.154477	-9.44194	3.65926e-21	4.76403e-20
JDP2	protein_coding	532.407	-1.19654	0.126753	-9.43999	3.72816e-21	4.8491e-20
CPED1	protein_coding	777.375	-2.02553	0.214623	-9.43761	3.8137e-21	4.95563e-20
STEAP3	protein_coding	6221.27	-1.71796	0.182238	-9.42701	4.21956e-21	5.457e-20
AQP3	protein_coding	3160.4	-1.55318	0.164775	-9.42605	4.25806e-21	5.50158e-20
UNC119B	protein_coding	625.904	1.17097	0.124441	9.40983	4.96935e-21	6.40844e-20
CLN3	protein_coding	1606.79	1.10139	0.117109	9.4048	5.21306e-21	6.71638e-20
RBL1	protein_coding	243.525	1.26466	0.134479	9.40417	5.24402e-21	6.74988e-20
TMEM220	protein_coding	2132.52	-1.50596	0.160155	-9.40309	5.29849e-21	6.80713e-20
CKAP2	protein_coding	492.83	1.21999	0.129793	9.39954	5.48022e-21	7.03398e-20
GTF2IRD1	protein_coding	589.696	1.10003	0.117059	9.39725	5.60103e-21	7.18227e-20
ELMSAN1	protein_coding	829.036	-1.02088	0.108802	-9.38293	6.41637e-21	8.21235e-20
C19orf48	protein_coding	2355.49	1.33509	0.142306	9.38185	6.48229e-21	8.28894e-20
MYO1B	protein_coding	11695.7	-1.1682	0.124548	-9.3795	6.62838e-21	8.4678e-20
PLXNC1	protein_coding	730.343	1.83642	0.195872	9.37563	6.87634e-21	8.76814e-20
HES6	protein_coding	349.791	1.39735	0.149121	9.37054	7.21633e-21	9.18449e-20
SOWAHA	protein_coding	557.929	1.85276	0.197776	9.36796	7.39446e-21	9.40242e-20
CFL2	protein_coding	3466.38	-1.07515	0.114815	-9.36424	7.65966e-21	9.72149e-20
RAB6B	protein_coding	175.104	1.48478	0.158587	9.36258	7.78131e-21	9.86509e-20
BHLHE40	protein_coding	7557.4	-1.3941	0.149018	-9.35524	8.34111e-21	1.05178e-19
FAM13A	protein_coding	1104.44	-1.88508	0.201532	-9.35373	8.46138e-21	1.06596e-19
SLC6A9	protein_coding	225.88	2.08829	0.223299	9.35201	8.59989e-21	1.08141e-19
CYP4A11	protein_coding	20679	-2.24792	0.24046	-9.34843	8.89625e-21	1.11559e-19
FAM212B	protein_coding	219.295	1.21959	0.130489	9.34631	9.07587e-21	1.13707e-19
PPP1R35	protein_coding	764.247	1.08864	0.116535	9.34173	9.47707e-21	1.18515e-19
GLA	protein_coding	1010.67	1.17577	0.125885	9.33998	9.6351e-21	1.20271e-19
MPP3	protein_coding	99.7139	1.89158	0.202584	9.3373	9.88262e-21	1.23248e-19
SFI1	protein_coding	657.737	1.28119	0.137309	9.33076	1.05113e-20	1.3073e-19
ATP6V1C1	protein_coding	3268.89	1.00618	0.107899	9.32523	1.1074e-20	1.37477e-19
ECHS1	protein_coding	28338.9	-1.21606	0.13043	-9.32344	1.12631e-20	1.39697e-19
RBMS3	protein_coding	197.618	-1.52305	0.163373	-9.32256	1.13562e-20	1.40724e-19
RFXANK	protein_coding	1362.67	1.09463	0.117431	9.32149	1.14713e-20	1.42021e-19
GINS4	protein_coding	124.35	1.74135	0.186946	9.31476	1.22225e-20	1.50911e-19
NAT2	protein_coding	586.351	-2.94749	0.316731	-9.30596	1.32783e-20	1.63502e-19
ARIH2OS	protein_coding	54.2764	1.04272	0.11205	9.30586	1.32917e-20	1.63519e-19
DLG5	protein_coding	687.639	1.60268	0.172297	9.30184	1.38038e-20	1.69208e-19
PSRC1	protein_coding	222.285	1.55559	0.167257	9.3006	1.39658e-20	1.7104e-19
ACAD11	protein_coding	107.468	-1.72893	0.186074	-9.29163	1.51947e-20	1.8559e-19
SERPINE1	protein_coding	9212.05	-2.20798	0.23769	-9.28934	1.55252e-20	1.89458e-19
ALB	protein_coding	3.11832e+06	-1.8308	0.197091	-9.28914	1.55535e-20	1.89633e-19
SEC24B	protein_coding	1822.03	-1.06991	0.115234	-9.28466	1.62218e-20	1.97428e-19
MMRN1	protein_coding	175.797	-1.95263	0.21036	-9.28235	1.65785e-20	2.01589e-19
CKS2	protein_coding	768.029	1.34851	0.14528	9.28212	1.66138e-20	2.01839e-19
TIGD7	protein_coding	68.5563	1.15787	0.124854	9.27377	1.79681e-20	2.17323e-19
AGO2	protein_coding	1235.96	1.01165	0.109155	9.26797	1.89717e-20	2.29055e-19
ALDH8A1	protein_coding	4956.22	-1.91294	0.206425	-9.26699	1.91479e-20	2.30978e-19
NR4A3	protein_coding	229.753	-2.20724	0.23847	-9.25585	2.12535e-20	2.55924e-19
CCDC170	protein_coding	369.127	2.47762	0.267719	9.25458	2.15083e-20	2.58764e-19
ZNF300	protein_coding	109.335	2.04668	0.22138	9.24509	2.35054e-20	2.82044e-19
PIAS3	protein_coding	504.878	1.00404	0.108645	9.24146	2.43147e-20	2.91243e-19
WDYHV1	protein_coding	416.797	1.13866	0.12336	9.23039	2.69651e-20	3.21576e-19
NPY1R	protein_coding	180.169	-2.3699	0.256779	-9.22935	2.72289e-20	3.24438e-19
FLNC	protein_coding	976.502	3.27586	0.355206	9.22244	2.90425e-20	3.45454e-19
FITM1	protein_coding	127.312	-2.06837	0.224276	-9.22243	2.90434e-20	3.45454e-19
CYP2B6	protein_coding	8693.11	-2.65828	0.288335	-9.21944	2.98662e-20	3.54623e-19
C11orf84	protein_coding	371.375	1.2076	0.131082	9.2126	3.1833e-20	3.77319e-19
C1orf198	protein_coding	2344.23	1.14603	0.124492	9.20568	3.3951e-20	4.02073e-19
ALPK3	protein_coding	771.638	2.06203	0.224251	9.19521	3.74259e-20	4.42073e-19
TNFRSF25	protein_coding	278.142	1.53217	0.166655	9.19367	3.79657e-20	4.47674e-19
ANXA2R	protein_coding	100.512	1.52255	0.165674	9.19003	3.92745e-20	4.62706e-19
TMEM27	protein_coding	347.387	-2.45469	0.267204	-9.18655	4.05659e-20	4.77507e-19
LPA	protein_coding	1766.21	-2.3366	0.254431	-9.18364	4.16777e-20	4.89328e-19
REXO5	protein_coding	222.45	1.36272	0.148495	9.17683	4.43953e-20	5.20337e-19
WEE1	protein_coding	1631.32	-1.18089	0.1288	-9.16845	4.7989e-20	5.60049e-19
PIM1	protein_coding	2071.96	-1.40196	0.152958	-9.16567	4.92388e-20	5.73653e-19
MTMR11	protein_coding	552.352	1.8952	0.206971	9.15683	5.34436e-20	6.21049e-19
SLC36A1	protein_coding	382.292	1.02386	0.11183	9.15549	5.41127e-20	6.28288e-19
SUCLG2	protein_coding	6699.96	-1.06377	0.116259	-9.15	5.69313e-20	6.60451e-19
EPHX2	protein_coding	6451.86	-1.53416	0.167766	-9.1446	5.98482e-20	6.92522e-19
C11orf54	protein_coding	4629.67	-1.16803	0.127728	-9.14467	5.98095e-20	6.92522e-19
RHBDL1	protein_coding	105.221	1.64059	0.179447	9.14245	6.10536e-20	7.05871e-19
SERPINI1	protein_coding	273.85	1.7499	0.191483	9.13866	6.32288e-20	7.304e-19
TDRKH	protein_coding	493.724	1.20758	0.132172	9.13645	6.45386e-20	7.44899e-19
GCNT3	protein_coding	323.751	3.02406	0.33202	9.10809	8.38481e-20	9.61256e-19
YPEL2	protein_coding	1254.55	-1.06596	0.117058	-9.1062	8.5317e-20	9.77274e-19
PFDN6	protein_coding	2605.31	1.04023	0.114237	9.10587	8.55786e-20	9.79447e-19
PDE7B	protein_coding	157.407	-1.67933	0.184826	-9.08602	1.02727e-19	1.1708e-18
PLEKHH1	protein_coding	184.578	1.38715	0.152756	9.08088	1.07705e-19	1.22446e-18
P3H4	protein_coding	610.953	1.56052	0.172051	9.0701	1.18909e-19	1.34734e-18
MAN1A1	protein_coding	7766.75	-1.1841	0.130582	-9.06788	1.21358e-19	1.37281e-18
OSBP2	protein_coding	193.795	1.72909	0.190706	9.06676	1.22604e-19	1.38461e-18
CFI	protein_coding	20242.9	-1.3751	0.151712	-9.06386	1.25909e-19	1.42075e-18
SLC41A2	protein_coding	2558.79	-1.37753	0.152023	-9.06133	1.28869e-19	1.45295e-18
SOX12	protein_coding	1203.86	1.39057	0.153488	9.05982	1.30671e-19	1.47205e-18
FABP5	protein_coding	286.917	1.69389	0.187032	9.05672	1.34428e-19	1.51188e-18
MT-CYB	protein_coding	397155	-1.2403	0.137008	-9.05273	1.39439e-19	1.56436e-18
SARDH	protein_coding	5714.81	-1.49708	0.165448	-9.04861	1.44801e-19	1.62052e-18
NOCT	protein_coding	335.288	-1.77278	0.19603	-9.04343	1.51835e-19	1.69506e-18
RCL1	protein_coding	1788.15	-1.47542	0.163291	-9.03552	1.63222e-19	1.81771e-18
VMO1	protein_coding	158.126	-1.40156	0.155175	-9.03209	1.68429e-19	1.87112e-18
SEMA6C	protein_coding	845.066	1.47883	0.163939	9.02059	1.8708e-19	2.07325e-18
PCDH17	protein_coding	292.043	1.3707	0.151967	9.01971	1.88592e-19	2.0883e-18
TESC	protein_coding	1259.13	2.78677	0.309199	9.01287	2.00734e-19	2.21914e-18
DCAF13	protein_coding	1629.06	1.03966	0.115667	8.98831	2.51052e-19	2.76197e-18
PLXNA1	protein_coding	908.898	1.30938	0.145794	8.98104	2.6823e-19	2.94621e-18
ACADM	protein_coding	5340.24	-1.29346	0.144156	-8.97264	2.89489e-19	3.17205e-18
MCC	protein_coding	793.632	-1.73325	0.193253	-8.9688	2.99762e-19	3.27934e-18
SP5	protein_coding	446.265	2.46214	0.274713	8.96261	3.17081e-19	3.45771e-18
NRCAM	protein_coding	495.899	3.26918	0.364831	8.96083	3.2225e-19	3.50846e-18
TMEM56	protein_coding	5684.97	-1.41171	0.157703	-8.95174	3.49907e-19	3.80047e-18
SPAG5	protein_coding	1252.39	1.34571	0.150439	8.94522	3.71194e-19	4.02206e-18
FBP1	protein_coding	16413.8	-2.02825	0.226961	-8.93655	4.01518e-19	4.34028e-18
ANKRD65	protein_coding	331.262	2.49451	0.279143	8.9363	4.02431e-19	4.3467e-18
BRICD5	protein_coding	91.5734	1.39341	0.156309	8.91444	4.90295e-19	5.26652e-18
SCP2	protein_coding	21065.3	-1.39199	0.156155	-8.91413	4.91659e-19	5.27702e-18
WFS1	protein_coding	1850.42	1.02275	0.114737	8.91384	4.92958e-19	5.28679e-18
CUEDC1	protein_coding	830.756	1.0388	0.116623	8.90739	5.22462e-19	5.57689e-18
ACTG2	protein_coding	279.196	1.89249	0.212598	8.90176	5.49701e-19	5.85846e-18
C1S	protein_coding	102997	-1.34007	0.150544	-8.90153	5.50835e-19	5.86596e-18
ASPA	protein_coding	185.252	-1.9354	0.217508	-8.89808	5.682e-19	6.04145e-18
CEMIP	protein_coding	224.386	2.41902	0.271967	8.89454	5.8662e-19	6.22758e-18
JPT1	protein_coding	2194.14	1.3168	0.148104	8.8911	6.05089e-19	6.40867e-18
STARD5	protein_coding	273.025	-1.51062	0.169968	-8.88763	6.24237e-19	6.60635e-18
MT-ND1	protein_coding	250673	-1.1642	0.131033	-8.88477	6.40543e-19	6.76316e-18
MYO15B	protein_coding	2326.12	1.4146	0.159399	8.87455	7.02153e-19	7.39077e-18
TKT	protein_coding	13491.7	1.49862	0.168958	8.86981	7.32736e-19	7.70079e-18
LRRC37A3	protein_coding	129.579	1.39719	0.157537	8.86897	7.38265e-19	7.75292e-18
GRAMD1C	protein_coding	534.658	-1.59659	0.18014	-8.86304	7.78599e-19	8.16391e-18
PLEKHG2	protein_coding	642.849	1.13389	0.128071	8.85357	8.47604e-19	8.867e-18
PYCR1	protein_coding	914.823	2.52727	0.285594	8.84917	8.81744e-19	9.21e-18
ITGA2	protein_coding	391.246	1.95368	0.220932	8.84293	9.3241e-19	9.71689e-18
NES	protein_coding	1650.09	1.26518	0.14319	8.83567	9.94977e-19	1.03373e-17
NECTIN1	protein_coding	766.669	1.24035	0.1404	8.83446	1.00581e-18	1.04418e-17
PHPT1	protein_coding	3508.15	1.22959	0.139204	8.83301	1.01893e-18	1.057e-17
FAM149A	protein_coding	854.076	-1.3722	0.15537	-8.83178	1.03021e-18	1.06628e-17
TNFSF4	protein_coding	161.803	1.75139	0.198336	8.8304	1.04302e-18	1.07871e-17
ASS1	protein_coding	50574.1	-1.76278	0.199659	-8.82897	1.05643e-18	1.09175e-17
ESR1	protein_coding	598.489	-2.48059	0.281048	-8.8262	1.08289e-18	1.11741e-17
VSIG4	protein_coding	506.857	-1.89549	0.214772	-8.82558	1.08896e-18	1.12281e-17
BRCA2	protein_coding	136.662	1.30855	0.14848	8.81299	1.21849e-18	1.25447e-17
LAMA3	protein_coding	1217.22	2.2555	0.255963	8.81182	1.23127e-18	1.26668e-17
SNX22	protein_coding	536.369	1.84507	0.209539	8.80539	1.30394e-18	1.34042e-17
CHKA	protein_coding	1865.13	1.11421	0.126577	8.80265	1.33628e-18	1.37263e-17
FIGNL1	protein_coding	308.241	1.09115	0.123978	8.80117	1.35399e-18	1.38977e-17
CLDN15	protein_coding	2040.83	1.80144	0.204715	8.79975	1.37122e-18	1.4064e-17
ABAT	protein_coding	15672.4	-1.62092	0.184233	-8.7982	1.39022e-18	1.42482e-17
WDR97	protein_coding	90.0292	1.5542	0.176723	8.79454	1.4364e-18	1.47104e-17
TMCO3	protein_coding	1772.23	1.25505	0.14271	8.79442	1.43792e-18	1.47149e-17
SLC39A10	protein_coding	443.382	1.26538	0.143916	8.79247	1.46312e-18	1.49615e-17
PDE2A	protein_coding	476.448	-1.49388	0.170295	-8.77231	1.75045e-18	1.78062e-17
ZNF580	protein_coding	471.829	1.14476	0.130533	8.76988	1.78861e-18	1.81538e-17
GCH1	protein_coding	2143.56	-1.52051	0.173466	-8.76547	1.85997e-18	1.8822e-17
PNPLA7	protein_coding	570.223	-1.38365	0.157935	-8.7609	1.93704e-18	1.95729e-17
KBTBD11	protein_coding	363.424	-2.34488	0.268146	-8.7448	2.23404e-18	2.24905e-17
GBP2	protein_coding	3981.46	1.38324	0.158183	8.74457	2.23874e-18	2.25212e-17
IRX3	protein_coding	222.41	2.50092	0.286111	8.74109	2.3087e-18	2.31908e-17
HEY1	protein_coding	261.68	1.32635	0.151812	8.73682	2.39759e-18	2.40659e-17
RFC3	protein_coding	365.652	1.04093	0.119266	8.72785	2.59553e-18	2.59953e-17
KLKB1	protein_coding	5093.2	-1.63338	0.187153	-8.72752	2.60315e-18	2.60525e-17
SYP	protein_coding	107.785	1.79226	0.205558	8.71896	2.80771e-18	2.7997e-17
POC1A	protein_coding	470.206	1.1087	0.127179	8.71767	2.83973e-18	2.82932e-17
GAREM1	protein_coding	568.221	-1.32475	0.15215	-8.70688	3.1236e-18	3.10333e-17
SMPD3	protein_coding	129.412	-1.93681	0.22278	-8.69382	3.50453e-18	3.46915e-17
FAM50A	protein_coding	3892.48	1.08142	0.124498	8.68623	3.74654e-18	3.69798e-17
RGS5	protein_coding	4357.96	1.42466	0.164034	8.68519	3.78125e-18	3.72954e-17
MAPK11	protein_coding	384.366	1.41797	0.163333	8.68147	3.90691e-18	3.85069e-17
CD5L	protein_coding	1055.04	-3.01651	0.347776	-8.67373	4.18193e-18	4.11549e-17
SMIM14	protein_coding	9256.99	-1.09698	0.126473	-8.67366	4.18463e-18	4.11549e-17
CYP4A22	protein_coding	5546.05	-2.17871	0.251321	-8.66904	4.35762e-18	4.27637e-17
SLC35E4	protein_coding	86.0356	1.36282	0.157334	8.66197	4.63688e-18	4.53085e-17
BARD1	protein_coding	163.105	1.2605	0.145537	8.66104	4.67479e-18	4.56288e-17
HIST1H3H	protein_coding	155.372	1.98737	0.229464	8.66092	4.6797e-18	4.56288e-17
CGREF1	protein_coding	1149.43	1.94127	0.224466	8.64836	5.22458e-18	5.0816e-17
APOL6	protein_coding	5382.81	-1.12061	0.129581	-8.64793	5.24436e-18	5.09522e-17
MS4A7	protein_coding	764.094	-1.47946	0.171198	-8.6418	5.53355e-18	5.37235e-17
TTLL4	protein_coding	1009.19	1.44149	0.166842	8.63985	5.62845e-18	5.45671e-17
C8A	protein_coding	13269	-1.83907	0.213029	-8.63295	5.97922e-18	5.78854e-17
ZNF213	protein_coding	314.608	1.02915	0.119231	8.6316	6.05022e-18	5.85312e-17
PGP	protein_coding	1022.72	1.16533	0.135062	8.62808	6.23901e-18	6.03149e-17
VSIG10L	protein_coding	409.5	2.08502	0.241697	8.62657	6.3221e-18	6.10748e-17
MMS22L	protein_coding	188.741	1.29722	0.150403	8.62492	6.41362e-18	6.1915e-17
PRRT3	protein_coding	75.7461	1.0603	0.123059	8.61614	6.92498e-18	6.65687e-17
ID1	protein_coding	1529.94	-1.79923	0.208969	-8.61003	7.30404e-18	7.01137e-17
GLYATL1	protein_coding	5320.39	-2.06588	0.240077	-8.60507	7.62716e-18	7.3061e-17
SLC45A4	protein_coding	449.76	1.99653	0.232036	8.60441	7.67135e-18	7.34327e-17
DBN1	protein_coding	1184.68	1.75396	0.20392	8.60119	7.88944e-18	7.54144e-17
HAMP	protein_coding	6453.86	-3.59102	0.417656	-8.59804	8.1092e-18	7.72982e-17
CNDP1	protein_coding	764.037	-3.27953	0.381673	-8.59252	8.50852e-18	8.0822e-17
MCMDC2	protein_coding	71.5875	1.22082	0.142109	8.59073	8.64206e-18	8.20334e-17
C11orf80	protein_coding	235.49	1.26439	0.147259	8.58615	8.99302e-18	8.5246e-17
BACH2	protein_coding	152.369	-1.71788	0.200142	-8.58332	9.21708e-18	8.73092e-17
TMEM198	protein_coding	288.109	1.43921	0.167799	8.57701	9.73728e-18	9.2045e-17
PRDM15	protein_coding	365.073	1.28861	0.150377	8.56921	1.04201e-17	9.82951e-17
MT2A	protein_coding	38649.5	-2.44327	0.285454	-8.55925	1.13601e-17	1.06866e-16
SQLE	protein_coding	4250.32	1.62282	0.189642	8.55726	1.15585e-17	1.08658e-16
GCDH	protein_coding	3596.27	-1.30785	0.152873	-8.55514	1.17722e-17	1.10514e-16
DSE	protein_coding	363.502	-1.40418	0.164438	-8.53927	1.35074e-17	1.26282e-16
EPHB2	protein_coding	473.939	2.48022	0.290523	8.53711	1.37621e-17	1.28487e-16
NAMPT	protein_coding	8646.06	-1.51671	0.177883	-8.5264	1.50971e-17	1.40662e-16
CDKN2AIPNL	protein_coding	1015.95	1.00167	0.117536	8.52222	1.56523e-17	1.45736e-16
BSG	protein_coding	20146.9	1.01937	0.119619	8.52182	1.57062e-17	1.46137e-16
PFKFB4	protein_coding	182.013	1.63276	0.19161	8.52129	1.57782e-17	1.46707e-16
PHLDB2	protein_coding	1455.69	-1.0221	0.119951	-8.52095	1.58254e-17	1.47045e-16
DDX11	protein_coding	510.314	1.25219	0.146992	8.51872	1.61333e-17	1.49703e-16
ALDH1B1	protein_coding	7033.48	-1.35306	0.159054	-8.50692	1.78614e-17	1.64728e-16
AXL	protein_coding	607.462	-1.35502	0.159306	-8.50582	1.8032e-17	1.66189e-16
DNASE1	protein_coding	284.611	1.06848	0.12567	8.50228	1.859e-17	1.71101e-16
GPHN	protein_coding	1412.6	-1.23147	0.144854	-8.50143	1.87273e-17	1.72248e-16
NR3C2	protein_coding	374.542	-1.37472	0.161963	-8.48786	2.10473e-17	1.93065e-16
PTK7	protein_coding	616.528	2.21884	0.261468	8.48609	2.13709e-17	1.95903e-16
F8	protein_coding	690.419	-1.30726	0.154079	-8.48433	2.1696e-17	1.98616e-16
DMD	protein_coding	1711.53	-1.31629	0.155174	-8.48269	2.20042e-17	2.01301e-16
NME1	protein_coding	2725.51	1.18861	0.140142	8.48151	2.22295e-17	2.03226e-16
SLC22A10	protein_coding	1415.92	-2.3136	0.272833	-8.47992	2.25353e-17	2.05884e-16
SASS6	protein_coding	151.841	1.03652	0.122288	8.47601	2.33045e-17	2.12626e-16
ANXA2	protein_coding	14246.8	1.17104	0.138173	8.47516	2.34748e-17	2.13894e-16
ADAMTS1	protein_coding	1411.67	-1.56266	0.18439	-8.47476	2.35562e-17	2.14492e-16
FBXO32	protein_coding	573.531	1.68472	0.198856	8.47205	2.41111e-17	2.19252e-16
GNB1L	protein_coding	250.305	1.02321	0.120802	8.4702	2.44965e-17	2.22608e-16
LZTS1	protein_coding	220.705	1.4046	0.165931	8.465	2.56149e-17	2.32306e-16
C6	protein_coding	15752	-1.96525	0.232272	-8.46099	2.65119e-17	2.40122e-16
HIST1H2BN	protein_coding	97.3688	1.52183	0.179949	8.45698	2.74398e-17	2.48361e-16
ORM1	protein_coding	150608	-1.83422	0.216974	-8.45366	2.82307e-17	2.55181e-16
AGTR1	protein_coding	1945.69	-1.46385	0.173335	-8.44521	3.035e-17	2.73974e-16
LAPTM4B	protein_coding	5191.54	1.5543	0.184167	8.43961	3.18407e-17	2.86671e-16
ACOT2	protein_coding	1648.49	-1.09691	0.130105	-8.43095	3.42871e-17	3.0829e-16
BRIP1	protein_coding	210.093	1.37313	0.162923	8.42809	3.51339e-17	3.15488e-16
VWF	protein_coding	3596.33	1.54066	0.182832	8.42665	3.55698e-17	3.19192e-16
ZNF618	protein_coding	653.735	1.0489	0.124493	8.42538	3.59573e-17	3.22456e-16
PKM	protein_coding	7720.18	1.82929	0.217664	8.4042	4.30785e-17	3.85052e-16
CYP39A1	protein_coding	1083.74	-2.44919	0.2917	-8.39627	4.60875e-17	4.11408e-16
UNKL	protein_coding	366.076	1.03067	0.122804	8.39284	4.74551e-17	4.23338e-16
ACVR1C	protein_coding	84.2736	-1.6788	0.200052	-8.39183	4.78644e-17	4.26431e-16
TSLP	protein_coding	125.747	-2.34295	0.279462	-8.38381	5.12433e-17	4.56236e-16
IGF2BP2	protein_coding	740.897	2.29246	0.273481	8.38252	5.18065e-17	4.60649e-16
IDNK	protein_coding	777.548	-1.18391	0.141247	-8.38186	5.20966e-17	4.62927e-16
CATSPER2	protein_coding	65.3673	1.23204	0.146996	8.38147	5.22689e-17	4.63993e-16
FBXL6	protein_coding	1373.63	1.12285	0.133974	8.38112	5.24265e-17	4.64949e-16
PFKFB2	protein_coding	595.751	1.21401	0.144853	8.38096	5.24973e-17	4.65273e-16
KCNJ5	protein_coding	214.51	1.90685	0.227554	8.37976	5.30362e-17	4.69744e-16
DPF3	protein_coding	98.6689	-1.80331	0.215209	-8.37933	5.32307e-17	4.71161e-16
SCML2	protein_coding	146.723	1.32628	0.158304	8.37809	5.37937e-17	4.75526e-16
RAP2A	protein_coding	1470.71	1.01177	0.120781	8.37693	5.4328e-17	4.79938e-16
NR6A1	protein_coding	299.492	1.25393	0.149735	8.37432	5.55428e-17	4.90352e-16
FEZ1	protein_coding	232.199	-1.44723	0.172894	-8.37059	5.73304e-17	5.05479e-16
ARHGAP10	protein_coding	322.578	-1.47825	0.176604	-8.37044	5.7403e-17	5.05792e-16
SERPING1	protein_coding	125671	-1.22933	0.146906	-8.36818	5.85171e-17	5.15276e-16
PLCB1	protein_coding	677.29	1.5268	0.182508	8.36565	5.97845e-17	5.25756e-16
PON3	protein_coding	7611.47	-1.53264	0.18321	-8.36547	5.98752e-17	5.26215e-16
ASPHD1	protein_coding	302.6	2.76934	0.33153	8.35322	6.6428e-17	5.83052e-16
C8orf76	protein_coding	454.374	1.02662	0.122903	8.35311	6.64862e-17	5.83188e-16
STC2	protein_coding	420.621	1.88848	0.226297	8.34516	7.11149e-17	6.21788e-16
C12orf75	protein_coding	558.847	2.17391	0.2605	8.34517	7.11122e-17	6.21788e-16
LIMK1	protein_coding	764.103	1.22454	0.146738	8.34505	7.11848e-17	6.22e-16
ATP11C	protein_coding	1360.11	-1.29153	0.154804	-8.343	7.24309e-17	6.32482e-16
ZP3	protein_coding	95.743	1.63769	0.196313	8.34225	7.28931e-17	6.36111e-16
HOGA1	protein_coding	1198.99	-1.8205	0.218229	-8.34214	7.29566e-17	6.36258e-16
CDK5R1	protein_coding	89.8872	1.26355	0.151503	8.34006	7.42538e-17	6.47157e-16
DLL4	protein_coding	614.304	1.06641	0.12787	8.3398	7.44152e-17	6.48149e-16
ST3GAL6	protein_coding	1347.32	-1.40437	0.168501	-8.33454	7.78023e-17	6.77218e-16
CDKN2B	protein_coding	351.561	1.32329	0.158901	8.32771	8.24224e-17	7.14695e-16
ZNF607	protein_coding	111.1	1.56076	0.187446	8.32642	8.33208e-17	7.22026e-16
PLGLB2	protein_coding	181.154	-1.90196	0.228487	-8.32415	8.49333e-17	7.34597e-16
CCR1	protein_coding	253.362	-1.50002	0.180319	-8.31875	8.88956e-17	7.67893e-16
CMTM4	protein_coding	545.591	1.26809	0.152494	8.31569	9.12163e-17	7.87441e-16
ZSWIM5	protein_coding	307.008	1.89038	0.227459	8.31088	9.49932e-17	8.19527e-16
DTNA	protein_coding	781.111	1.73198	0.208553	8.30473	1.00048e-16	8.60416e-16
UGP2	protein_coding	14401.5	-1.13093	0.136219	-8.30226	1.02146e-16	8.77344e-16
STXBP4	protein_coding	305.851	1.05268	0.126928	8.29355	1.09922e-16	9.41175e-16
GRHPR	protein_coding	16794.5	-1.20915	0.14586	-8.28977	1.1347e-16	9.69723e-16
PEMT	protein_coding	3165.34	-1.33262	0.160812	-8.28678	1.1636e-16	9.91932e-16
SLC7A2	protein_coding	10408.7	-1.72642	0.208336	-8.28669	1.16442e-16	9.9201e-16
LONRF1	protein_coding	391.758	-1.00153	0.120864	-8.28643	1.16702e-16	9.9361e-16
TMEM136	protein_coding	129.149	1.35814	0.163908	8.28599	1.17126e-16	9.96595e-16
PAQR6	protein_coding	103.648	1.57548	0.190285	8.2796	1.23595e-16	1.04865e-15
ESCO2	protein_coding	97.9793	1.64693	0.198943	8.27839	1.24847e-16	1.05701e-15
NRIP2	protein_coding	128.659	1.15882	0.140342	8.25708	1.49274e-16	1.25602e-15
C8B	protein_coding	17890.8	-1.56708	0.189883	-8.25284	1.54668e-16	1.30061e-15
KLF13	protein_coding	2735.34	1.0492	0.127168	8.25048	1.57761e-16	1.32579e-15
PDZK1IP1	protein_coding	2691.64	2.98803	0.362552	8.24167	1.6983e-16	1.42371e-15
CCL3	protein_coding	209.581	-1.59781	0.19399	-8.23655	1.77242e-16	1.48311e-15
GJA5	protein_coding	341	1.52107	0.184742	8.23351	1.81813e-16	1.5195e-15
FSD1L	protein_coding	91.2179	1.16041	0.141028	8.22819	1.90058e-16	1.58451e-15
CITED2	protein_coding	1812.93	-1.13688	0.138251	-8.22334	1.97916e-16	1.64801e-15
S100A10	protein_coding	6242.68	1.25261	0.152353	8.22181	2.00457e-16	1.66815e-15
UQCC2	protein_coding	1956.02	1.0002	0.121663	8.22102	2.01784e-16	1.67817e-15
MT-CO1	protein_coding	871229	-1.0835	0.131803	-8.22058	2.02522e-16	1.68328e-15
ZNF71	protein_coding	182.765	1.09408	0.133132	8.21801	2.06913e-16	1.71664e-15
IL18R1	protein_coding	226.634	-1.48835	0.181306	-8.20909	2.22877e-16	1.84347e-15
ANKRD29	protein_coding	364.761	1.66997	0.203485	8.20684	2.27078e-16	1.87708e-15
NR4A2	protein_coding	520.185	-1.89868	0.231459	-8.20308	2.34313e-16	1.93103e-15
TEAD2	protein_coding	884.259	1.3914	0.169668	8.2007	2.38982e-16	1.96832e-15
FABP4	protein_coding	447.749	2.36633	0.288576	8.20003	2.40323e-16	1.97816e-15
C1QTNF6	protein_coding	833.555	1.19883	0.146215	8.19909	2.42223e-16	1.9926e-15
PLXNA3	protein_coding	656.676	1.41273	0.172307	8.19893	2.42539e-16	1.994e-15
SERPINB8	protein_coding	548.767	-1.46932	0.179267	-8.19625	2.48012e-16	2.03531e-15
PLG	protein_coding	71916.4	-1.71571	0.209912	-8.17348	2.99621e-16	2.44706e-15
E2F5	protein_coding	239.15	1.17356	0.143843	8.15864	3.3881e-16	2.75227e-15
HS3ST3B1	protein_coding	1683.94	-1.55738	0.191043	-8.15199	3.57998e-16	2.89951e-15
PSMG3	protein_coding	1201.74	1.06994	0.131256	8.1516	3.59139e-16	2.90702e-15
C11orf96	protein_coding	1017.04	-1.88866	0.231698	-8.15138	3.59781e-16	2.91049e-15
SIGLEC9	protein_coding	90.9283	-1.39137	0.171065	-8.13358	4.16782e-16	3.35369e-15
KAZALD1	protein_coding	136.367	1.75938	0.216346	8.13222	4.21488e-16	3.38756e-15
SLC51B	protein_coding	401.783	2.36708	0.291122	8.13087	4.26206e-16	3.42346e-15
SORL1	protein_coding	4841.86	-1.35499	0.166767	-8.12508	4.47069e-16	3.58681e-15
MAN1C1	protein_coding	1077.17	-1.6864	0.207628	-8.12221	4.5776e-16	3.66827e-15
FPR1	protein_coding	139.578	-1.91812	0.236183	-8.12133	4.61117e-16	3.693e-15
DUSP10	protein_coding	1865.11	-1.15	0.141774	-8.11145	5.00179e-16	3.99411e-15
KAZN	protein_coding	127.436	-1.74014	0.214638	-8.10734	5.17403e-16	4.11717e-15
RHBDF2	protein_coding	981.524	1.05372	0.129975	8.10708	5.18527e-16	4.12371e-15
BLNK	protein_coding	1077.4	-1.03695	0.127934	-8.10535	5.25941e-16	4.17537e-15
C8orf59	protein_coding	1420.47	1.02138	0.126043	8.10348	5.34084e-16	4.23754e-15
LAGE3	protein_coding	1100.97	1.13578	0.140325	8.0939	5.77842e-16	4.56867e-15
HGH1	protein_coding	2234.82	1.06068	0.131256	8.08099	6.42437e-16	5.05896e-15
SLC8A1	protein_coding	160.872	-1.32369	0.163839	-8.07924	6.5171e-16	5.12902e-15
DMGDH	protein_coding	4969.09	-1.6253	0.201267	-8.07536	6.72781e-16	5.28874e-15
ARHGAP22	protein_coding	75.5158	1.42446	0.176688	8.062	7.50541e-16	5.88643e-15
HPX	protein_coding	136616	-1.73721	0.215489	-8.06172	7.52275e-16	5.89665e-15
FANCA	protein_coding	365.484	1.01777	0.126252	8.06142	7.54127e-16	5.90776e-15
SYDE2	protein_coding	102.855	-1.27424	0.158191	-8.05506	7.94422e-16	6.20242e-15
NKX3-1	protein_coding	109.63	-1.5632	0.194073	-8.05469	7.96821e-16	6.21721e-15
NGFR	protein_coding	656.372	-2.01651	0.250447	-8.05165	8.16881e-16	6.3628e-15
SRD5A1	protein_coding	2575.07	-1.34379	0.167144	-8.03975	9.00251e-16	6.97234e-15
ALS2CL	protein_coding	1354.61	1.39633	0.173693	8.03904	9.05474e-16	7.00881e-15
CIART	protein_coding	333.696	1.49747	0.186475	8.03044	9.71253e-16	7.49669e-15
TXNRD1	protein_coding	7756.14	1.38372	0.172325	8.02968	9.77298e-16	7.53481e-15
HBB	protein_coding	1134.95	-2.07484	0.258737	-8.0191	1.06519e-15	8.18929e-15
METTL12	protein_coding	94.3113	1.08589	0.13545	8.01686	1.08483e-15	8.33559e-15
C19orf57	protein_coding	110.442	1.34576	0.167874	8.0165	1.08797e-15	8.35502e-15
LPCAT1	protein_coding	1842.6	1.42655	0.178001	8.01425	1.10808e-15	8.49508e-15
LRG1	protein_coding	32527.8	-1.64776	0.205827	-8.00555	1.18933e-15	9.09881e-15
GOLGA8A	protein_coding	289.487	1.73924	0.217525	7.9956	1.28947e-15	9.84144e-15
AQP7	protein_coding	554.631	-1.25942	0.157657	-7.98837	1.3673e-15	1.04063e-14
ACSL4	protein_coding	12343.1	2.16364	0.270898	7.9869	1.38375e-15	1.05256e-14
GAL3ST1	protein_coding	741.848	2.49204	0.312114	7.98438	1.41226e-15	1.07365e-14
CA12	protein_coding	1090.35	2.86966	0.359626	7.97957	1.46839e-15	1.11446e-14
ACACB	protein_coding	4510.78	-1.21715	0.152715	-7.97008	1.58571e-15	1.20082e-14
TTC36	protein_coding	1160.36	-2.77349	0.348266	-7.96371	1.6695e-15	1.26077e-14
VKORC1	protein_coding	3353.21	-1.02746	0.12909	-7.95926	1.7307e-15	1.30482e-14
NIPAL1	protein_coding	401.192	-1.68323	0.211901	-7.9435	1.96554e-15	1.47535e-14
MT-ND3	protein_coding	105108	-1.1588	0.146074	-7.93292	2.14046e-15	1.60048e-14
PKN1	protein_coding	4959.76	1.05146	0.132632	7.92767	2.23292e-15	1.66413e-14
MFGE8	protein_coding	1140.13	1.20354	0.151938	7.92128	2.35081e-15	1.74912e-14
RNF24	protein_coding	352.648	1.02083	0.128875	7.92104	2.35529e-15	1.7515e-14
ABHD6	protein_coding	1692.52	-1.08183	0.136584	-7.92056	2.36436e-15	1.75729e-14
SERPINH1	protein_coding	4412.08	1.09853	0.138799	7.91456	2.4812e-15	1.84111e-14
MT1F	protein_coding	3077.07	-2.91033	0.3678	-7.9128	2.5167e-15	1.86644e-14
SLC25A47	protein_coding	8614.1	-2.65073	0.335014	-7.91229	2.52697e-15	1.87202e-14
ZNF530	protein_coding	90.4137	1.12382	0.14213	7.90699	2.63689e-15	1.94816e-14
AP1M2	protein_coding	788.055	3.10269	0.392481	7.90535	2.6719e-15	1.97248e-14
CCSAP	protein_coding	362.068	1.016	0.128521	7.90531	2.67271e-15	1.97248e-14
CKLF	protein_coding	285.781	1.03796	0.131322	7.90392	2.70276e-15	1.99358e-14
KIAA0040	protein_coding	987.517	-1.10296	0.139646	-7.89827	2.82796e-15	2.08142e-14
RETREG1	protein_coding	1017.27	-2.28817	0.290156	-7.88601	3.11998e-15	2.28402e-14
MT1X	protein_coding	14065.7	-2.53403	0.321718	-7.87657	3.36482e-15	2.45403e-14
TRIM31	protein_coding	464.12	2.32714	0.295529	7.87448	3.42169e-15	2.49284e-14
BLVRA	protein_coding	917.556	1.26315	0.160528	7.86872	3.5828e-15	2.60187e-14
MT-ND2	protein_coding	277234	-1.08547	0.137949	-7.86862	3.58584e-15	2.6027e-14
VAMP1	protein_coding	259.078	1.03842	0.132012	7.86607	3.65959e-15	2.65339e-14
GC	protein_coding	134668	-1.24112	0.157894	-7.86044	3.82797e-15	2.77253e-14
FAH	protein_coding	9255.17	-1.01279	0.12888	-7.8584	3.89067e-15	2.81645e-14
CCDC102B	protein_coding	144.31	1.29445	0.164728	7.8581	3.90013e-15	2.8218e-14
AFM	protein_coding	9317.32	-1.91404	0.243879	-7.84831	4.21687e-15	3.04611e-14
SERPINA11	protein_coding	9585.24	-1.98289	0.252679	-7.84746	4.24542e-15	3.06511e-14
BEND3	protein_coding	164.556	1.14934	0.146462	7.84733	4.24994e-15	3.06675e-14
GDPD1	protein_coding	108.56	1.14956	0.146674	7.83749	4.59654e-15	3.30635e-14
QDPR	protein_coding	5883.46	-1.08641	0.138861	-7.82369	5.12969e-15	3.67628e-14
APC2	protein_coding	128.328	1.0405	0.133046	7.82063	5.25611e-15	3.7649e-14
DUSP5	protein_coding	1078.17	-1.55322	0.198621	-7.82003	5.28114e-15	3.78084e-14
GNAO1	protein_coding	580.623	-2.24955	0.287676	-7.81974	5.29337e-15	3.78761e-14
CD81	protein_coding	25551.5	-1.03981	0.132984	-7.81906	5.32213e-15	3.8042e-14
FGF13	protein_coding	278.907	1.91391	0.244792	7.81852	5.34498e-15	3.81853e-14
LMNB1	protein_coding	1015.52	1.20856	0.154674	7.81355	5.55998e-15	3.96796e-14
MYBL1	protein_coding	179.606	1.21116	0.155013	7.81327	5.57243e-15	3.97269e-14
TBKBP1	protein_coding	326.977	1.05965	0.135766	7.80501	5.94989e-15	4.23514e-14
FBLIM1	protein_coding	1124.61	1.34784	0.172965	7.79256	6.56628e-15	4.66172e-14
MFAP3L	protein_coding	1140.84	-1.89319	0.242964	-7.79207	6.5922e-15	4.67768e-14
PTGDR2	protein_coding	134.284	1.94766	0.250015	7.79019	6.69109e-15	4.74292e-14
FAM3B	protein_coding	848.197	2.97766	0.382307	7.78868	6.77128e-15	4.79726e-14
ERRFI1	protein_coding	14997.2	-1.36302	0.17512	-7.78333	7.0638e-15	4.99931e-14
PLP2	protein_coding	1696.54	1.51526	0.194763	7.78002	7.25145e-15	5.12679e-14
DCN	protein_coding	4724.66	-2.30622	0.296502	-7.77812	7.36113e-15	5.20164e-14
IFI27L1	protein_coding	445.548	1.04873	0.134871	7.77583	7.49516e-15	5.2936e-14
TTC39B	protein_coding	455.927	-1.16701	0.150197	-7.76986	7.85755e-15	5.54094e-14
KIAA1211L	protein_coding	112.225	1.32006	0.169906	7.76936	7.88852e-15	5.5599e-14
NADK2	protein_coding	9819.52	-1.06239	0.136772	-7.7676	7.99898e-15	5.63192e-14
SORT1	protein_coding	2296.98	1.20361	0.155061	7.76213	8.35131e-15	5.86403e-14
ILDR2	protein_coding	305.559	2.27852	0.293605	7.76048	8.46113e-15	5.93585e-14
ADGRL1	protein_coding	488.756	1.85234	0.238693	7.76033	8.47089e-15	5.93964e-14
RDH5	protein_coding	434.878	-1.54842	0.199609	-7.75725	8.67881e-15	6.07918e-14
HAAO	protein_coding	7569.9	-1.37622	0.177564	-7.75055	9.14942e-15	6.39568e-14
CP	protein_coding	41470.7	-1.54277	0.199192	-7.74514	9.54803e-15	6.65725e-14
A1CF	protein_coding	9219.11	-1.01982	0.131683	-7.74455	9.592e-15	6.68449e-14
LY6E	protein_coding	8683.27	-1.99138	0.257145	-7.74419	9.61914e-15	6.69655e-14
KMO	protein_coding	1314.74	-1.81355	0.234328	-7.73934	9.99341e-15	6.94646e-14
BCAT1	protein_coding	258.686	1.44516	0.186772	7.73759	1.01316e-14	7.03175e-14
HP	protein_coding	510161	-2.01567	0.260627	-7.73395	1.04263e-14	7.22896e-14
PYCR3	protein_coding	1344.83	1.03186	0.133456	7.73188	1.05972e-14	7.33998e-14
TDGF1	protein_coding	388.037	2.4516	0.317255	7.72752	1.09664e-14	7.56873e-14
IGFBP4	protein_coding	46459.9	-1.0519	0.136241	-7.72086	1.15546e-14	7.96266e-14
NTN4	protein_coding	729.625	-1.28217	0.166103	-7.71908	1.1717e-14	8.07047e-14
MANF	protein_coding	4466.19	1.01254	0.131301	7.71156	1.2429e-14	8.53068e-14
MAFF	protein_coding	1331.93	-1.24483	0.161509	-7.70753	1.28277e-14	8.78663e-14
FAM229A	protein_coding	96.8838	1.04694	0.13606	7.69468	1.41848e-14	9.66762e-14
PHYHIPL	protein_coding	416.128	1.98076	0.257549	7.69083	1.46181e-14	9.95304e-14
SEMA4F	protein_coding	234.363	1.39619	0.181652	7.68606	1.51731e-14	1.03155e-13
TTC9	protein_coding	968.253	1.78866	0.232856	7.68139	1.57376e-14	1.06779e-13
CD300A	protein_coding	276.669	-1.26898	0.165234	-7.67987	1.59256e-14	1.08001e-13
PLA2G4C	protein_coding	983.978	1.24197	0.161769	7.67743	1.62309e-14	1.10017e-13
CNTNAP1	protein_coding	180.771	1.56155	0.203423	7.67635	1.6368e-14	1.10891e-13
TMPRSS2	protein_coding	1919.28	-1.29413	0.168632	-7.67428	1.66352e-14	1.12645e-13
MICB	protein_coding	197.754	1.26656	0.165203	7.66665	1.76548e-14	1.19312e-13
HIC2	protein_coding	309.707	1.2506	0.163265	7.65995	1.86002e-14	1.25329e-13
PCK1	protein_coding	48934.1	-2.2198	0.289916	-7.65667	1.90809e-14	1.28504e-13
STAB1	protein_coding	2813.05	-1.10434	0.144303	-7.65293	1.96451e-14	1.32226e-13
PPM1K	protein_coding	455.594	-1.28726	0.16838	-7.64493	2.09052e-14	1.40098e-13
GYS2	protein_coding	2795.97	-2.19055	0.286811	-7.63758	2.21345e-14	1.4819e-13
DBNDD1	protein_coding	1539.19	1.57886	0.206792	7.63502	2.25793e-14	1.51094e-13
S100A1	protein_coding	282.548	1.96869	0.25841	7.61847	2.56704e-14	1.7069e-13
CD14	protein_coding	20326.5	-1.42791	0.18755	-7.61352	2.66721e-14	1.76489e-13
FNIP2	protein_coding	2204.13	-1.26868	0.166679	-7.61155	2.70836e-14	1.78778e-13
THBS1	protein_coding	6097.61	-1.66418	0.218697	-7.60953	2.75095e-14	1.81501e-13
ADH1A	protein_coding	24443.4	-1.80434	0.237397	-7.60055	2.94881e-14	1.94086e-13
ENTPD2	protein_coding	204.426	1.6874	0.222067	7.5986	2.99345e-14	1.96739e-13
CD1D	protein_coding	338.204	-1.60269	0.211094	-7.59233	3.14196e-14	2.06102e-13
ZNF57	protein_coding	156.633	1.18987	0.156742	7.59122	3.16911e-14	2.07783e-13
MT-ND5	protein_coding	166048	-1.2828	0.169131	-7.58467	3.33347e-14	2.17826e-13
SIGLEC1	protein_coding	576.194	-1.3595	0.179273	-7.58342	3.36554e-14	2.19711e-13
AVPI1	protein_coding	1264.9	-1.04434	0.137754	-7.5812	3.42362e-14	2.23182e-13
RPL22L1	protein_coding	1954.58	1.44581	0.190811	7.57718	3.5314e-14	2.29879e-13
GOT2	protein_coding	13486	-1.01431	0.133884	-7.57609	3.56133e-14	2.31716e-13
SMYD2	protein_coding	2565.01	1.00241	0.132477	7.56667	3.82923e-14	2.48317e-13
AGXT2	protein_coding	2374.8	-1.80194	0.238206	-7.56463	3.88963e-14	2.51994e-13
ADH6	protein_coding	12511.3	-1.54447	0.204186	-7.564	3.90861e-14	2.53103e-13
BORA	protein_coding	71.3806	1.03252	0.136638	7.55661	4.13702e-14	2.67513e-13
MSC	protein_coding	660.68	2.45402	0.324905	7.55304	4.25229e-14	2.74706e-13
MT-ND6	protein_coding	71676.3	-1.31705	0.174526	-7.54642	4.47391e-14	2.88476e-13
ARSD	protein_coding	3102.97	-1.00447	0.133165	-7.54306	4.59082e-14	2.95687e-13
C15orf48	protein_coding	305.769	2.29838	0.304722	7.54256	4.60844e-14	2.9645e-13
COL8A1	protein_coding	301.251	1.6824	0.223106	7.54083	4.67006e-14	2.99847e-13
ACSM5	protein_coding	5293.23	-1.86992	0.24807	-7.53787	4.77717e-14	3.0658e-13
NAV3	protein_coding	259.687	2.25741	0.29978	7.53022	5.06533e-14	3.24615e-13
INAVA	protein_coding	298.168	2.41501	0.320708	7.53024	5.06472e-14	3.24615e-13
ARHGEF26	protein_coding	1236.75	-1.29399	0.17199	-7.52363	5.32755e-14	3.40619e-13
KCTD17	protein_coding	557.672	1.6851	0.224007	7.52253	5.37263e-14	3.43178e-13
ALDOA	protein_coding	18451	1.12797	0.150036	7.51798	5.56286e-14	3.54665e-13
PLAG1	protein_coding	109.845	1.83146	0.243973	7.50683	6.0578e-14	3.85139e-13
NT5M	protein_coding	131.832	1.28359	0.171029	7.50509	6.13875e-14	3.90104e-13
PPP1R16A	protein_coding	4715.75	1.15691	0.154204	7.50246	6.2631e-14	3.97636e-13
ADH4	protein_coding	43046.1	-2.38152	0.317876	-7.49197	6.78455e-14	4.29541e-13
SRXN1	protein_coding	165.967	1.38283	0.184702	7.48681	7.05692e-14	4.4637e-13
FAM78B	protein_coding	116.071	1.26433	0.168922	7.48468	7.17197e-14	4.53437e-13
ORM2	protein_coding	42810.3	-1.56279	0.208876	-7.48192	7.32471e-14	4.62451e-13
FGB	protein_coding	385117	-1.5854	0.211975	-7.47917	7.47913e-14	4.71545e-13
KIF21B	protein_coding	471.075	1.49583	0.200044	7.47752	7.57366e-14	4.77063e-13
PINK1	protein_coding	1775.02	-1.03207	0.138025	-7.47746	7.5773e-14	4.77072e-13
DHTKD1	protein_coding	7537.3	-1.06153	0.142085	-7.4711	7.95264e-14	4.9955e-13
AZGP1	protein_coding	47068.4	-1.57667	0.211234	-7.46406	8.38978e-14	5.25074e-13
CDNF	protein_coding	118.447	-1.02293	0.137055	-7.46365	8.41565e-14	5.26451e-13
HGF	protein_coding	572.219	-2.05403	0.275276	-7.46171	8.54095e-14	5.34044e-13
SPAG4	protein_coding	279.111	1.43641	0.192551	7.4599	8.6591e-14	5.40936e-13
C5orf30	protein_coding	155.877	1.70615	0.229091	7.44746	9.51553e-14	5.90647e-13
MFSD6	protein_coding	496.443	1.21287	0.162956	7.44291	9.84946e-14	6.10819e-13
ARID3C	protein_coding	190.76	-1.59794	0.2147	-7.44265	9.86824e-14	6.11705e-13
KCNJ11	protein_coding	135.341	1.73457	0.23348	7.42918	1.09271e-13	6.74273e-13
SELENOM	protein_coding	1812.49	1.8032	0.242721	7.42912	1.09321e-13	6.74279e-13
CDC25B	protein_coding	2343.59	1.0203	0.137385	7.42656	1.11456e-13	6.86827e-13
C1orf162	protein_coding	380.923	-1.20044	0.161715	-7.42314	1.14372e-13	7.0384e-13
ADM	protein_coding	1009.5	-1.34278	0.180912	-7.42225	1.15145e-13	7.08278e-13
DTX1	protein_coding	1053.79	-1.84026	0.247993	-7.42062	1.16573e-13	7.16414e-13
CISH	protein_coding	1810.91	-1.22381	0.164942	-7.41966	1.17426e-13	7.21328e-13
MT1E	protein_coding	10011.1	-2.57452	0.347191	-7.41528	1.2137e-13	7.4489e-13
LDHD	protein_coding	4570.16	-1.32382	0.178616	-7.41155	1.24835e-13	7.64434e-13
PDGFRB	protein_coding	2983.08	1.1505	0.155357	7.40552	1.30642e-13	7.98912e-13
SLC38A4	protein_coding	14938.2	-1.51861	0.205215	-7.40009	1.3609e-13	8.30366e-13
APOBEC3B	protein_coding	172.321	1.87627	0.253648	7.39717	1.3912e-13	8.4772e-13
SLC9A9	protein_coding	205.541	-1.2016	0.162452	-7.39662	1.39695e-13	8.50839e-13
CKB	protein_coding	2659.96	2.08379	0.281726	7.3965	1.3982e-13	8.51224e-13
FGL2	protein_coding	845.7	-1.27661	0.172729	-7.39085	1.45891e-13	8.86992e-13
TSPAN5	protein_coding	370.615	2.03691	0.275663	7.38912	1.47808e-13	8.98248e-13
LPIN2	protein_coding	9000.51	-1.07196	0.145116	-7.38689	1.503e-13	9.12577e-13
ADGRG6	protein_coding	3046.84	-1.33635	0.181056	-7.38083	1.57302e-13	9.53396e-13
MMP14	protein_coding	3849.76	1.34269	0.182098	7.37345	1.66266e-13	1.00683e-12
ALAS1	protein_coding	14425.4	-1.2689	0.172447	-7.35817	1.8645e-13	1.12556e-12
PGGHG	protein_coding	2686.2	1.65972	0.225697	7.35376	1.92709e-13	1.16128e-12
RDH16	protein_coding	10628.6	-2.02659	0.275597	-7.35345	1.93148e-13	1.16341e-12
PRKAA2	protein_coding	591.096	1.84565	0.251234	7.34633	2.03728e-13	1.22606e-12
MTHFD1	protein_coding	12545.5	-1.23921	0.168703	-7.34553	2.04943e-13	1.23228e-12
ZFPM2	protein_coding	91.3186	-1.35659	0.184761	-7.34244	2.0974e-13	1.25945e-12
TLR3	protein_coding	394.672	-1.17935	0.160738	-7.33711	2.18251e-13	1.30941e-12
PSAT1	protein_coding	4448.1	-1.31005	0.178603	-7.33495	2.218e-13	1.32778e-12
IL33	protein_coding	530.561	-1.60151	0.218408	-7.33265	2.25644e-13	1.34961e-12
COBLL1	protein_coding	3873.97	-1.10696	0.150972	-7.33221	2.26393e-13	1.35349e-12
BEX2	protein_coding	329.677	2.58092	0.352039	7.33134	2.27866e-13	1.35954e-12
SLC19A3	protein_coding	815.392	-1.46754	0.200174	-7.33132	2.27903e-13	1.35954e-12
SH3D21	protein_coding	80.0371	1.20286	0.164068	7.33147	2.27645e-13	1.35954e-12
FANCC	protein_coding	813.391	-1.05846	0.144437	-7.32819	2.33286e-13	1.38983e-12
LYZ	protein_coding	13018.2	2.17593	0.297002	7.32632	2.3656e-13	1.40871e-12
SMC4	protein_coding	771.298	1.25383	0.171156	7.32563	2.37784e-13	1.41539e-12
CD226	protein_coding	82.1241	-1.42622	0.194722	-7.32436	2.40036e-13	1.42817e-12
LOX	protein_coding	393.902	1.64024	0.223992	7.32276	2.42919e-13	1.44406e-12
MDGA1	protein_coding	248.971	1.99158	0.272011	7.3217	2.44846e-13	1.45488e-12
ADGRA3	protein_coding	2635.3	-1.19643	0.163582	-7.31394	2.59418e-13	1.53811e-12
BICD1	protein_coding	155.081	1.2197	0.166874	7.30909	2.68953e-13	1.59257e-12
FERMT1	protein_coding	210.853	2.19481	0.300602	7.30137	2.84859e-13	1.68383e-12
NAALADL1	protein_coding	225.03	1.90763	0.261381	7.29829	2.91444e-13	1.72126e-12
NNMT	protein_coding	32356.2	-2.22231	0.304679	-7.29395	3.00987e-13	1.77455e-12
GPR137C	protein_coding	80.05	1.21848	0.167141	7.29016	3.09593e-13	1.82213e-12
GAS2L3	protein_coding	245.087	1.16118	0.159469	7.28153	3.30052e-13	1.9392e-12
ZEB2	protein_coding	638.456	-1.14956	0.158385	-7.25801	3.92814e-13	2.29706e-12
SHMT1	protein_coding	13701.5	-1.28758	0.177573	-7.25101	4.13685e-13	2.4129e-12
RSAD2	protein_coding	331.838	-1.64086	0.226357	-7.24902	4.19811e-13	2.44444e-12
SAA4	protein_coding	5788.45	-1.84067	0.254056	-7.24513	4.32013e-13	2.5112e-12
SRPX	protein_coding	227.636	-2.00094	0.276343	-7.24079	4.46095e-13	2.58864e-12
ABLIM2	protein_coding	232.478	1.45725	0.201463	7.23335	4.71233e-13	2.73103e-12
CD24	protein_coding	5624.18	2.05316	0.283937	7.23104	4.79312e-13	2.77196e-12
GPR146	protein_coding	88.0044	-1.2307	0.170327	-7.22552	4.99189e-13	2.88324e-12
SLC16A3	protein_coding	1095.97	1.71229	0.237193	7.21898	5.23789e-13	3.01893e-12
ADRA1B	protein_coding	201.197	-1.57757	0.218542	-7.21861	5.25232e-13	3.02597e-12
ARHGEF37	protein_coding	401.675	1.44139	0.199829	7.21313	5.46792e-13	3.14221e-12
DEPDC7	protein_coding	1275.37	-1.24144	0.172127	-7.21237	5.49874e-13	3.15859e-12
ASNS	protein_coding	448.048	1.74343	0.241811	7.20991	5.59896e-13	3.20805e-12
ABCC9	protein_coding	1374.32	-1.56709	0.217375	-7.20914	5.6307e-13	3.22487e-12
FGF12	protein_coding	191.754	1.99037	0.276233	7.2054	5.7875e-13	3.31051e-12
HIST1H2AG	protein_coding	163.022	2.08893	0.290955	7.17957	6.99289e-13	3.96836e-12
CIB2	protein_coding	129.931	1.67678	0.233831	7.1709	7.45088e-13	4.22299e-12
MFSD10	protein_coding	1134.01	1.09744	0.153052	7.17037	7.47959e-13	4.2375e-12
MAP2	protein_coding	989.8	1.57945	0.220289	7.16991	7.50498e-13	4.25012e-12
UGT2B7	protein_coding	17288.6	-1.82	0.253922	-7.16756	7.63457e-13	4.31992e-12
SPINK1	protein_coding	15514.9	2.89465	0.403923	7.16634	7.70276e-13	4.35489e-12
PEX11G	protein_coding	428.206	-1.12455	0.157031	-7.16133	7.98989e-13	4.51161e-12
HAO1	protein_coding	9932.52	-1.46332	0.204356	-7.16064	8.03017e-13	4.53247e-12
SLC7A8	protein_coding	366.712	-1.42608	0.199195	-7.1592	8.11477e-13	4.57833e-12
ALDH4A1	protein_coding	14985.5	-1.06983	0.14947	-7.15746	8.21867e-13	4.6312e-12
NFAM1	protein_coding	239.674	-1.26469	0.177012	-7.14464	9.02322e-13	5.06363e-12
ARHGEF2	protein_coding	1256.22	1.03932	0.145674	7.13455	9.71043e-13	5.43585e-12
ABCC4	protein_coding	547.829	1.59317	0.223523	7.12753	1.02189e-12	5.70176e-12
MOGAT2	protein_coding	1933.54	-2.23277	0.313278	-7.12713	1.02486e-12	5.716e-12
SERPINA10	protein_coding	12442.5	-1.16621	0.163799	-7.11972	1.08144e-12	6.01432e-12
HOMER3	protein_coding	544.508	1.26545	0.177757	7.11901	1.08706e-12	6.04065e-12
SPHK1	protein_coding	912.015	2.1579	0.303231	7.11637	1.10808e-12	6.15244e-12
LRRN2	protein_coding	171.752	1.8328	0.257553	7.11622	1.10925e-12	6.15393e-12
ABLIM3	protein_coding	3281.12	-1.05488	0.148272	-7.11448	1.12336e-12	6.22714e-12
APOL1	protein_coding	10881.9	-1.02567	0.144225	-7.11162	1.14689e-12	6.34984e-12
HAO2	protein_coding	3565.54	-2.36558	0.332878	-7.10644	1.19072e-12	6.57915e-12
GLUL	protein_coding	141107	2.02209	0.284729	7.10182	1.23124e-12	6.79477e-12
BCHE	protein_coding	2636.06	-1.90081	0.267733	-7.09966	1.25065e-12	6.89351e-12
CENPX	protein_coding	2645.08	1.04566	0.147341	7.09688	1.27609e-12	7.02237e-12
ORAOV1	protein_coding	454.475	1.03093	0.145344	7.09303	1.31207e-12	7.21164e-12
FAM167B	protein_coding	269.025	-1.02081	0.143963	-7.09077	1.33367e-12	7.32443e-12
COL1A1	protein_coding	18868.3	1.80339	0.254414	7.08841	1.35666e-12	7.44171e-12
SERPINF2	protein_coding	61683.4	-1.27123	0.179504	-7.08188	1.42208e-12	7.78487e-12
ANXA10	protein_coding	959.285	-1.86691	0.263659	-7.08076	1.4337e-12	7.84221e-12
TYRO3	protein_coding	444.536	1.71195	0.241896	7.07724	1.47057e-12	8.04066e-12
ZSCAN31	protein_coding	570.525	1.37005	0.193598	7.07679	1.47531e-12	8.05521e-12
CAPN12	protein_coding	638.832	1.52922	0.216279	7.07061	1.54257e-12	8.40733e-12
STX11	protein_coding	120.002	-1.33564	0.188986	-7.06741	1.57856e-12	8.58742e-12
SPON2	protein_coding	8508.75	1.05868	0.149915	7.06188	1.64262e-12	8.92765e-12
SLC22A1	protein_coding	14834.2	-2.37801	0.336754	-7.06155	1.64658e-12	8.94562e-12
MMP9	protein_coding	806.26	2.05921	0.291648	7.0606	1.65786e-12	9.0033e-12
THBD	protein_coding	558.557	-1.25594	0.178048	-7.05396	1.73902e-12	9.42154e-12
MCTP1	protein_coding	331.582	1.55053	0.219947	7.04955	1.79498e-12	9.71312e-12
PLCD3	protein_coding	306.966	1.38209	0.196077	7.04872	1.80566e-12	9.76705e-12
ZBED6CL	protein_coding	899.277	1.04839	0.148739	7.04855	1.80786e-12	9.77504e-12
SCARA3	protein_coding	897.814	1.54515	0.21926	7.04713	1.82642e-12	9.86761e-12
RPL8	protein_coding	70597.9	1.17035	0.166154	7.04375	1.87131e-12	1.00981e-11
PTPN14	protein_coding	478.377	1.21213	0.172145	7.04131	1.9044e-12	1.02645e-11
SHISA4	protein_coding	680.409	1.37469	0.195258	7.04039	1.91709e-12	1.03288e-11
PLPPR1	protein_coding	803.361	1.57676	0.224015	7.03861	1.94164e-12	1.04445e-11
PXMP2	protein_coding	3436.07	-1.0713	0.152408	-7.02915	2.07798e-12	1.11472e-11
TREM2	protein_coding	236.129	1.60973	0.229273	7.02101	2.20267e-12	1.17793e-11
SKAP1	protein_coding	465.818	-1.53119	0.21834	-7.01288	2.33457e-12	1.24404e-11
FGA	protein_coding	581471	-1.38134	0.196979	-7.01261	2.33913e-12	1.24598e-11
PIEZO2	protein_coding	1214.94	1.12016	0.159751	7.01192	2.35067e-12	1.25164e-11
NAT14	protein_coding	325.71	1.26442	0.180449	7.00705	2.43396e-12	1.29447e-11
MPEG1	protein_coding	1234.28	-1.12051	0.159959	-7.00497	2.47038e-12	1.3123e-11
LRRK2	protein_coding	310.686	-1.24264	0.177533	-6.99952	2.5685e-12	1.36124e-11
C5AR1	protein_coding	409.853	-1.10666	0.158178	-6.99631	2.62798e-12	1.39061e-11
MBL2	protein_coding	5168.82	-1.83525	0.262615	-6.98838	2.78086e-12	1.46808e-11
CLTCL1	protein_coding	614.713	1.12922	0.161829	6.97782	2.99793e-12	1.5784e-11
FAXDC2	protein_coding	4049.39	-1.17381	0.168311	-6.97408	3.07869e-12	1.61967e-11
CYP2C9	protein_coding	23175.5	-1.82994	0.262398	-6.97392	3.0823e-12	1.62094e-11
HK3	protein_coding	182.987	-1.39085	0.199631	-6.96713	3.23472e-12	1.69652e-11
AMOTL2	protein_coding	1296.4	-1.04464	0.150008	-6.9639	3.30972e-12	1.73252e-11
PCK2	protein_coding	22094.9	-1.25835	0.180726	-6.96273	3.33738e-12	1.74633e-11
GIPC2	protein_coding	683.713	-1.30907	0.188242	-6.95419	3.54598e-12	1.84838e-11
EHHADH	protein_coding	11240.4	-1.31278	0.188801	-6.95325	3.56955e-12	1.85925e-11
SPECC1	protein_coding	371.399	1.55222	0.223267	6.95231	3.59353e-12	1.87103e-11
GLUD1	protein_coding	25194.5	-1.07569	0.15476	-6.9507	3.63487e-12	1.8911e-11
SYTL5	protein_coding	96.9459	-1.6465	0.237048	-6.94584	3.76205e-12	1.95578e-11
B9D1	protein_coding	450.142	1.07247	0.154615	6.93641	4.02186e-12	2.08528e-11
FRMD3	protein_coding	211.189	1.68646	0.243325	6.93091	4.1814e-12	2.16388e-11
ASPSCR1	protein_coding	4314.84	1.19864	0.172958	6.93025	4.20098e-12	2.17319e-11
STAMBPL1	protein_coding	203.831	1.15566	0.16677	6.92966	4.21848e-12	2.18141e-11
B3GNT5	protein_coding	454.969	1.66605	0.241027	6.91231	4.76828e-12	2.45177e-11
ESPL1	protein_coding	470.931	1.35937	0.196691	6.91117	4.80684e-12	2.47066e-11
PROZ	protein_coding	1263.64	-1.60945	0.233162	-6.90273	5.10118e-12	2.61505e-11
HERC5	protein_coding	511.994	-1.3977	0.202531	-6.90119	5.1568e-12	2.64158e-11
F13A1	protein_coding	476.299	1.78807	0.259405	6.89297	5.46412e-12	2.79061e-11
PGBD1	protein_coding	214.692	1.037	0.150677	6.88228	5.89024e-12	3.00037e-11
C9	protein_coding	22522	-2.5982	0.377588	-6.88105	5.9413e-12	3.02412e-11
GSTA4	protein_coding	1211.35	1.064	0.154823	6.87237	6.31426e-12	3.20762e-11
MAP1A	protein_coding	138.917	1.4912	0.217023	6.87115	6.36871e-12	3.23201e-11
HMOX1	protein_coding	3660.56	-1.374	0.199975	-6.87089	6.3803e-12	3.23669e-11
PRTFDC1	protein_coding	123.687	1.24044	0.180671	6.86575	6.61408e-12	3.35279e-11
PRR18	protein_coding	197.508	-1.47998	0.215891	-6.8552	7.12121e-12	3.60183e-11
OLFML3	protein_coding	550.161	-1.51566	0.221386	-6.84621	7.58345e-12	3.82427e-11
FGG	protein_coding	326504	-1.39106	0.203278	-6.84314	7.74772e-12	3.90566e-11
AGMAT	protein_coding	3385.46	-1.00315	0.146646	-6.84061	7.88542e-12	3.97214e-11
CYP1A2	protein_coding	7001.88	-3.25839	0.476458	-6.83876	7.98798e-12	4.01935e-11
GPR65	protein_coding	94.1237	-1.17008	0.171197	-6.83469	8.21831e-12	4.13372e-11
GATM	protein_coding	48835.9	-1.21102	0.177251	-6.83225	8.35909e-12	4.20298e-11
SERPINA1	protein_coding	1.0715e+06	-1.08914	0.159446	-6.83078	8.44561e-12	4.24335e-11
TEK	protein_coding	316.043	-1.37257	0.200959	-6.83011	8.48484e-12	4.25992e-11
PRRG4	protein_coding	1297.17	-1.00709	0.147485	-6.8284	8.58693e-12	4.30959e-11
CREB3L1	protein_coding	238.612	1.90155	0.278502	6.82777	8.62436e-12	4.32678e-11
FRMD6	protein_coding	490.273	-1.11555	0.163486	-6.8235	8.88457e-12	4.44587e-11
SPART	protein_coding	430.525	-1.3519	0.198184	-6.82143	9.01356e-12	4.50711e-11
OBSCN	protein_coding	467.027	2.00699	0.294552	6.81371	9.51144e-12	4.74042e-11
BMP4	protein_coding	503.261	1.69738	0.249155	6.81253	9.5898e-12	4.77772e-11
PLCH2	protein_coding	492.49	2.16324	0.317807	6.80676	9.98189e-12	4.96762e-11
PELI2	protein_coding	105.809	-1.45446	0.213685	-6.80656	9.99594e-12	4.9728e-11
SCGN	protein_coding	610.636	2.16777	0.318658	6.80282	1.02593e-11	5.09265e-11
ADH1B	protein_coding	94674.6	-1.82304	0.268196	-6.79742	1.06508e-11	5.2755e-11
AMDHD1	protein_coding	3740.35	-1.38382	0.203588	-6.79718	1.06687e-11	5.28241e-11
TSPAN8	protein_coding	4092.6	1.8394	0.270624	6.79687	1.06914e-11	5.29175e-11
NFATC4	protein_coding	303.788	1.33667	0.196667	6.79659	1.07124e-11	5.30019e-11
MT-ATP8	protein_coding	27186.9	-1.14511	0.168553	-6.79374	1.09261e-11	5.40004e-11
RIDA	protein_coding	15066.8	-1.23336	0.181569	-6.79276	1.10007e-11	5.43494e-11
SRGN	protein_coding	1653.73	-1.1068	0.162949	-6.79231	1.10351e-11	5.44997e-11
NPM2	protein_coding	182.002	1.91267	0.281697	6.78981	1.12281e-11	5.53927e-11
MC1R	protein_coding	83.5252	1.16858	0.172169	6.78737	1.14195e-11	5.62964e-11
RNF144A	protein_coding	271.28	1.13166	0.166904	6.78032	1.19913e-11	5.90084e-11
PHGDH	protein_coding	4199.29	-1.51008	0.222768	-6.77872	1.21246e-11	5.95784e-11
TDO2	protein_coding	11923.4	-1.81609	0.268189	-6.7717	1.27277e-11	6.23622e-11
IYD	protein_coding	1144.82	-1.62165	0.239512	-6.77065	1.28207e-11	6.27952e-11
HIST1H1C	protein_coding	6705.68	1.44606	0.213779	6.76427	1.33987e-11	6.55085e-11
TTYH3	protein_coding	3300.51	1.01269	0.14974	6.76295	1.35205e-11	6.60805e-11
ARL2	protein_coding	908.837	1.01209	0.149692	6.76114	1.36914e-11	6.68434e-11
DPYD	protein_coding	2381.59	-1.021	0.151268	-6.74962	1.48235e-11	7.20612e-11
GPD1	protein_coding	4417.75	-1.62529	0.240884	-6.74718	1.50743e-11	7.31756e-11
HIST1H4I	protein_coding	644.924	1.02765	0.152319	6.74673	1.51215e-11	7.33526e-11
PKDCC	protein_coding	866.15	1.2862	0.190658	6.74609	1.51878e-11	7.36482e-11
CXCL2	protein_coding	2065.41	-1.55991	0.231268	-6.74502	1.53003e-11	7.41411e-11
AVPR1A	protein_coding	1606.27	-2.4915	0.369447	-6.74387	1.54227e-11	7.47073e-11
ACOX2	protein_coding	5356.44	-1.15519	0.171535	-6.73447	1.6453e-11	7.96134e-11
SSC4D	protein_coding	289.045	1.52711	0.226803	6.73319	1.65986e-11	8.02894e-11
FOXF1	protein_coding	101.927	-1.34519	0.199798	-6.73278	1.66447e-11	8.04837e-11
AGPAT4	protein_coding	198.421	1.35488	0.201265	6.73184	1.67526e-11	8.0977e-11
NCOA7	protein_coding	1879.36	-1.05359	0.156531	-6.73084	1.68684e-11	8.15076e-11
FOLH1	protein_coding	630.057	-1.32579	0.197141	-6.72508	1.75491e-11	8.46467e-11
ARMC9	protein_coding	136.592	1.04201	0.155085	6.71898	1.82998e-11	8.78946e-11
TMEM154	protein_coding	175.376	-1.76578	0.262808	-6.71888	1.83121e-11	8.79022e-11
ZNF431	protein_coding	162.531	1.09856	0.163517	6.71836	1.83787e-11	8.81492e-11
PLIN1	protein_coding	524.426	-1.65875	0.24706	-6.71397	1.89397e-11	9.07441e-11
TNFRSF19	protein_coding	476.747	2.18958	0.326389	6.70849	1.96653e-11	9.40224e-11
IGSF1	protein_coding	312.938	2.06141	0.307307	6.70797	1.97353e-11	9.42909e-11
CA2	protein_coding	3190.89	-1.33783	0.199522	-6.7052	2.01126e-11	9.59924e-11
GABARAPL1	protein_coding	4699.03	-1.07636	0.160629	-6.70091	2.07131e-11	9.86514e-11
CCL4	protein_coding	254.301	-1.3543	0.202185	-6.6983	2.10858e-11	1.00321e-10
F9	protein_coding	12638.6	-1.88319	0.281348	-6.69346	2.17952e-11	1.03624e-10
UROC1	protein_coding	3024.77	-2.29997	0.343934	-6.68724	2.27421e-11	1.07975e-10
MT-ND4L	protein_coding	39447.8	-1.21012	0.181076	-6.68292	2.34221e-11	1.11049e-10
ABCA3	protein_coding	395.246	1.39049	0.208098	6.68189	2.35879e-11	1.11758e-10
PCNX2	protein_coding	178.747	1.45271	0.217769	6.67086	2.54317e-11	1.20076e-10
PRR7	protein_coding	125.917	1.24349	0.186432	6.66991	2.55965e-11	1.2077e-10
SQSTM1	protein_coding	32276.5	1.06545	0.159936	6.66171	2.70666e-11	1.27618e-10
MFSD2A	protein_coding	3161.97	-2.26757	0.34056	-6.65835	2.76925e-11	1.30434e-10
RAB3D	protein_coding	295.78	1.58763	0.238469	6.65758	2.78365e-11	1.31067e-10
F11	protein_coding	3205.66	-1.23158	0.185129	-6.65255	2.88061e-11	1.35119e-10
TMSB10	protein_coding	21474.7	1.2649	0.190457	6.64141	3.10692e-11	1.45285e-10
AIFM3	protein_coding	93.7366	1.26388	0.190419	6.63736	3.19342e-11	1.49176e-10
SCN4B	protein_coding	118.367	1.19877	0.180621	6.63693	3.20292e-11	1.49528e-10
CACNB3	protein_coding	132.311	1.11029	0.16735	6.63456	3.25471e-11	1.51831e-10
TBX15	protein_coding	943.801	-1.77876	0.268201	-6.63218	3.3076e-11	1.54245e-10
CASS4	protein_coding	83.1319	-1.07182	0.161663	-6.62998	3.35737e-11	1.56406e-10
WSCD1	protein_coding	195.666	1.41222	0.213132	6.62603	3.44825e-11	1.6042e-10
HKDC1	protein_coding	1734.88	1.65137	0.249294	6.62417	3.4921e-11	1.62251e-10
RPL39L	protein_coding	287.953	1.72494	0.260436	6.62328	3.51312e-11	1.63049e-10
CYP4F2	protein_coding	5703.17	-1.62145	0.245175	-6.61344	3.75485e-11	1.73735e-10
VCAN	protein_coding	1584.8	1.95721	0.296066	6.61073	3.82425e-11	1.76886e-10
SEMA3G	protein_coding	459.321	1.10719	0.167512	6.6096	3.8535e-11	1.78179e-10
TGFBR3	protein_coding	1215.35	-1.15785	0.175234	-6.60745	3.90998e-11	1.80606e-10
SCAMP5	protein_coding	800.63	1.3652	0.206643	6.60659	3.93281e-11	1.81538e-10
C1QTNF1	protein_coding	1582.29	-1.61821	0.245011	-6.60466	3.98444e-11	1.83797e-10
RHBG	protein_coding	2107.57	2.66258	0.403355	6.60109	4.08135e-11	1.88012e-10
SPSB1	protein_coding	2262.79	-1.00572	0.152498	-6.59499	4.25274e-11	1.95511e-10
DISP2	protein_coding	115.498	1.54756	0.234764	6.59198	4.34008e-11	1.99392e-10
PAX8	protein_coding	168.49	1.2822	0.19459	6.58924	4.42086e-11	2.0283e-10
MECOM	protein_coding	279.531	1.16105	0.176207	6.58913	4.42416e-11	2.02913e-10
SLC27A2	protein_coding	8080.63	-1.335	0.202682	-6.58666	4.49829e-11	2.06035e-10
ITGB4	protein_coding	864.41	1.48204	0.225038	6.58576	4.52567e-11	2.0722e-10
CCDC3	protein_coding	729.681	-1.22447	0.186115	-6.57908	4.73368e-11	2.16236e-10
RTN2	protein_coding	377.603	1.2629	0.19204	6.57621	4.826e-11	2.20306e-10
GLS	protein_coding	1620.75	1.07586	0.163684	6.57278	4.93847e-11	2.25289e-10
MYRF	protein_coding	2614.33	1.07849	0.164116	6.57151	4.98061e-11	2.27002e-10
KIF7	protein_coding	138.814	1.21791	0.185333	6.5715	4.98103e-11	2.27002e-10
CAVIN3	protein_coding	389.074	1.24272	0.189145	6.57019	5.02498e-11	2.28929e-10
KITLG	protein_coding	326.901	1.13685	0.173274	6.56097	5.34603e-11	2.43149e-10
PWWP2B	protein_coding	658.721	1.04181	0.158954	6.5542	5.59428e-11	2.53678e-10
CPLX1	protein_coding	469.285	1.51108	0.230614	6.55242	5.66137e-11	2.56635e-10
ACE	protein_coding	302.976	1.00282	0.15306	6.55181	5.68438e-11	2.57592e-10
TSPAN7	protein_coding	630.762	-1.05856	0.16158	-6.5513	5.70392e-11	2.58392e-10
CHST1	protein_coding	183.588	1.35509	0.206937	6.54833	5.81822e-11	2.63307e-10
ZNF320	protein_coding	325.562	1.45039	0.221534	6.54703	5.86927e-11	2.65353e-10
ATOH8	protein_coding	868.643	-1.66486	0.254415	-6.54388	5.99437e-11	2.7074e-10
CCDC112	protein_coding	109.119	1.03804	0.158726	6.53986	6.1577e-11	2.77749e-10
ANKS6	protein_coding	519.161	1.37636	0.21052	6.53789	6.23933e-11	2.81244e-10
TMEM74B	protein_coding	195.535	1.39561	0.213602	6.5337	6.41639e-11	2.88653e-10
IKBKE	protein_coding	300.192	1.19705	0.183374	6.52793	6.66862e-11	2.99407e-10
SLC16A4	protein_coding	212.301	-1.61198	0.247094	-6.52374	6.85771e-11	3.07593e-10
SRD5A2	protein_coding	1322.42	-2.01112	0.309515	-6.49765	8.15857e-11	3.63667e-10
MTMR7	protein_coding	181.351	1.71936	0.264908	6.49041	8.5602e-11	3.80947e-10
SRC	protein_coding	1381.67	1.14914	0.177196	6.48511	8.86667e-11	3.94328e-10
GLOD5	protein_coding	87.2087	-1.49612	0.230745	-6.48388	8.93957e-11	3.97311e-10
SEMA7A	protein_coding	435.346	1.33276	0.205755	6.47744	9.32892e-11	4.13671e-10
CYP2J2	protein_coding	3891.95	-1.13743	0.175892	-6.46668	1.00182e-10	4.42941e-10
HAPLN3	protein_coding	145.164	1.39753	0.216239	6.46288	1.02726e-10	4.53453e-10
KCND3	protein_coding	817.099	-1.89921	0.293972	-6.46052	1.04342e-10	4.60434e-10
CD69	protein_coding	127.788	-1.38013	0.213657	-6.45955	1.05016e-10	4.63261e-10
MROH6	protein_coding	484.565	1.34682	0.208788	6.45065	1.11373e-10	4.89717e-10
SMARCD3	protein_coding	368.859	1.34098	0.207989	6.44736	1.13814e-10	4.99646e-10
DAGLA	protein_coding	209.698	1.42176	0.220538	6.44677	1.14257e-10	5.01267e-10
CPT1B	protein_coding	67.0928	1.0599	0.164531	6.44197	1.17931e-10	5.16553e-10
KLRD1	protein_coding	92.2853	-1.27696	0.198288	-6.43995	1.1951e-10	5.23134e-10
AKR1D1	protein_coding	3985.41	-1.92035	0.298345	-6.43665	1.22137e-10	5.3412e-10
AXIN2	protein_coding	467.097	1.96556	0.305796	6.42767	1.2957e-10	5.65176e-10
MELTF	protein_coding	473.861	1.69682	0.263991	6.42757	1.29664e-10	5.65402e-10
SLC16A2	protein_coding	3614.12	-1.1901	0.185215	-6.42547	1.31463e-10	5.72513e-10
CAPG	protein_coding	1389.46	1.34426	0.209278	6.42333	1.33327e-10	5.80446e-10
MPDZ	protein_coding	2552.54	-1.13136	0.176782	-6.39972	1.55658e-10	6.73152e-10
SSPO	protein_coding	121.298	1.4279	0.223425	6.39098	1.64831e-10	7.11465e-10
GOLM1	protein_coding	4039.11	1.26818	0.19865	6.38402	1.72495e-10	7.43605e-10
ZNF43	protein_coding	173.225	1.31048	0.205416	6.37962	1.77529e-10	7.63374e-10
TMEM98	protein_coding	2006.79	1.20447	0.189015	6.37237	1.86132e-10	7.98603e-10
ZNF83	protein_coding	585.982	1.41044	0.221349	6.37202	1.86549e-10	8.00143e-10
ALPL	protein_coding	2706.93	-1.5705	0.246617	-6.36817	1.91297e-10	8.20248e-10
SLC22A15	protein_coding	155.832	1.71908	0.269951	6.36811	1.91368e-10	8.20296e-10
P3H2	protein_coding	213.186	-1.34716	0.211676	-6.36424	1.96258e-10	8.3967e-10
CPE	protein_coding	2644.57	1.30375	0.204873	6.36369	1.96959e-10	8.42405e-10
GADD45G	protein_coding	3864.31	-1.38013	0.217065	-6.35812	2.04239e-10	8.7245e-10
PIGZ	protein_coding	238.311	1.03245	0.162628	6.34855	2.17356e-10	9.25289e-10
MRAS	protein_coding	701.146	1.07157	0.168809	6.3478	2.18414e-10	9.29502e-10
HES4	protein_coding	162.389	1.21797	0.191909	6.34664	2.20069e-10	9.35672e-10
TRNP1	protein_coding	928.122	1.76934	0.27887	6.34469	2.22877e-10	9.46407e-10
EIF4E3	protein_coding	502.449	-1.15226	0.181726	-6.34065	2.28795e-10	9.7005e-10
MICAL1	protein_coding	674.884	1.05754	0.166796	6.34032	2.29287e-10	9.71531e-10
RPL36A	protein_coding	2544.02	1.02399	0.16151	6.34008	2.29647e-10	9.7245e-10
COL9A2	protein_coding	169.542	1.63422	0.257843	6.33804	2.327e-10	9.85074e-10
CCDC80	protein_coding	1335.72	1.80643	0.285073	6.33673	2.34691e-10	9.92885e-10
ZNF703	protein_coding	723.95	1.34002	0.211506	6.33563	2.3637e-10	9.99677e-10
DHRS1	protein_coding	3498.32	-1.02455	0.162105	-6.32029	2.61081e-10	1.10009e-09
YBX2	protein_coding	230.336	1.96295	0.311371	6.30421	2.89662e-10	1.21377e-09
PAIP2B	protein_coding	782.984	-1.39765	0.221734	-6.30325	2.9146e-10	1.22093e-09
SATB1	protein_coding	530.774	-1.10466	0.175458	-6.29584	3.05747e-10	1.27842e-09
STEAP4	protein_coding	971.438	-1.66352	0.26459	-6.28715	3.23348e-10	1.34746e-09
FAM46C	protein_coding	567.657	-1.16787	0.18585	-6.28393	3.30129e-10	1.37488e-09
CPB2	protein_coding	26378.9	-1.06168	0.169131	-6.27723	3.44648e-10	1.43316e-09
ST6GALNAC4	protein_coding	357.279	1.02386	0.163232	6.27241	3.55496e-10	1.47604e-09
RGN	protein_coding	7553.39	-1.10025	0.175814	-6.25804	3.89837e-10	1.61516e-09
ASPDH	protein_coding	2595.43	-1.60783	0.256987	-6.25645	3.93839e-10	1.63075e-09
RNF180	protein_coding	159.87	-1.15769	0.185105	-6.25425	3.99422e-10	1.65236e-09
GBP1	protein_coding	2601.55	-1.04836	0.167639	-6.25368	4.00895e-10	1.65795e-09
NCKAP5	protein_coding	133.495	-1.28119	0.2049	-6.25274	4.03323e-10	1.66748e-09
KLF9	protein_coding	5148.44	-1.01173	0.161871	-6.25023	4.09851e-10	1.69293e-09
SHBG	protein_coding	1863.14	-1.78876	0.28623	-6.24939	4.1207e-10	1.70004e-09
FTCD	protein_coding	17681.4	-1.398	0.223711	-6.24913	4.12749e-10	1.70233e-09
TSPAN10	protein_coding	115.727	1.05317	0.168578	6.24735	4.17464e-10	1.72073e-09
CACNA1C	protein_coding	137.926	1.20975	0.193672	6.2464	4.20028e-10	1.73077e-09
INHBC	protein_coding	2408.62	-1.39501	0.223397	-6.24454	4.2504e-10	1.74931e-09
OXCT1	protein_coding	229.41	1.65891	0.265735	6.24275	4.29957e-10	1.76795e-09
SLC27A5	protein_coding	25406.7	-1.52852	0.245358	-6.22974	4.67209e-10	1.91419e-09
SGK1	protein_coding	3258.31	-1.13453	0.182153	-6.22845	4.71078e-10	1.92831e-09
LILRB1	protein_coding	178.976	-1.1482	0.18442	-6.226	4.78497e-10	1.9575e-09
RIMS3	protein_coding	83.5481	1.12933	0.181482	6.22285	4.8819e-10	1.99596e-09
GGT5	protein_coding	1436.2	-1.38168	0.222083	-6.22145	4.92581e-10	2.0127e-09
CLIP2	protein_coding	866.307	1.23365	0.198357	6.21935	4.9923e-10	2.0356e-09
GPR180	protein_coding	532.403	-1.02316	0.164517	-6.21916	4.99839e-10	2.03747e-09
SULT1A1	protein_coding	4631.57	-1.12369	0.180695	-6.2187	5.01293e-10	2.04279e-09
SORD	protein_coding	10168.7	-1.10796	0.178279	-6.21474	5.14094e-10	2.09182e-09
ADAMTSL2	protein_coding	1258.35	-1.52041	0.244807	-6.21062	5.27759e-10	2.14615e-09
C7	protein_coding	4934.22	-2.04182	0.328813	-6.20965	5.31017e-10	2.15811e-09
CRYBG1	protein_coding	733.024	-1.01746	0.163998	-6.20409	5.5016e-10	2.23191e-09
ANGPT2	protein_coding	317.26	1.03281	0.166837	6.19051	5.99686e-10	2.42346e-09
FCN1	protein_coding	178.096	-1.29228	0.208897	-6.18622	6.16252e-10	2.48672e-09
HSD17B6	protein_coding	22862.1	-1.39166	0.22505	-6.18376	6.25912e-10	2.52279e-09
EVA1A	protein_coding	2632.25	-1.05729	0.170976	-6.18385	6.25573e-10	2.52279e-09
UGT2B10	protein_coding	11482.4	-1.61906	0.261827	-6.1837	6.2618e-10	2.52305e-09
MMP24	protein_coding	165.023	1.53936	0.248982	6.18261	6.30522e-10	2.53904e-09
EXOSC4	protein_coding	1879.11	1.05495	0.170786	6.17702	6.53213e-10	2.62576e-09
TMEM82	protein_coding	994.944	-1.74353	0.282362	-6.17481	6.62446e-10	2.66052e-09
GLYAT	protein_coding	4704.62	-1.97657	0.32022	-6.17252	6.72107e-10	2.69693e-09
IL4I1	protein_coding	187.515	1.5452	0.250338	6.17245	6.72384e-10	2.69725e-09
PGF	protein_coding	343.229	1.00271	0.162556	6.16839	6.89883e-10	2.76338e-09
NDRG1	protein_coding	10435.8	1.18867	0.192713	6.16807	6.91275e-10	2.76815e-09
SOX6	protein_coding	412.35	-1.37993	0.223729	-6.16788	6.92124e-10	2.77037e-09
FAM198A	protein_coding	230.639	-1.84559	0.299252	-6.16735	6.94425e-10	2.77831e-09
CDH11	protein_coding	350.984	1.5787	0.255994	6.16697	6.96118e-10	2.78427e-09
PAQR5	protein_coding	506.156	1.81513	0.294896	6.15518	7.49931e-10	2.99248e-09
FAT4	protein_coding	309.716	-1.2415	0.201807	-6.15192	7.65527e-10	3.05025e-09
ARHGAP4	protein_coding	1325	1.06945	0.173979	6.14702	7.895e-10	3.13843e-09
FHL1	protein_coding	950.785	-1.07321	0.174782	-6.14031	8.23627e-10	3.26933e-09
TMEM119	protein_coding	198.921	1.69777	0.276548	6.13917	8.29551e-10	3.29188e-09
APOA5	protein_coding	13335.6	-1.5128	0.246763	-6.1306	8.75462e-10	3.46597e-09
FXYD1	protein_coding	1172.18	-1.84047	0.300341	-6.12794	8.90236e-10	3.51836e-09
BSN	protein_coding	186.561	1.27252	0.207703	6.1266	8.9774e-10	3.54493e-09
FHL2	protein_coding	611.105	-1.19879	0.195726	-6.12485	9.07698e-10	3.58114e-09
GCKR	protein_coding	2568.25	-1.1222	0.183245	-6.12405	9.12246e-10	3.59804e-09
TMIGD3	protein_coding	149.813	-1.22334	0.200018	-6.11616	9.58545e-10	3.76648e-09
RAB34	protein_coding	932.306	1.50436	0.246014	6.11492	9.66056e-10	3.7949e-09
ATP8B3	protein_coding	114.002	1.1036	0.180519	6.11348	9.74808e-10	3.82708e-09
GJB2	protein_coding	1453.02	-1.09444	0.179029	-6.11316	9.76751e-10	3.8336e-09
OGDHL	protein_coding	5005.26	-1.42247	0.232857	-6.10876	1.00407e-09	3.93628e-09
NAALADL2	protein_coding	159.49	-1.288	0.21096	-6.10543	1.02525e-09	4.01703e-09
MST1	protein_coding	12122.4	-1.01751	0.166684	-6.10444	1.0316e-09	4.03956e-09
ZG16	protein_coding	708.673	-1.75834	0.288267	-6.09969	1.06271e-09	4.15782e-09
ALDOB	protein_coding	213404	-1.55849	0.255854	-6.09132	1.11981e-09	4.36868e-09
MAP1B	protein_coding	658.595	1.09008	0.178991	6.09014	1.1281e-09	4.39848e-09
SEMA3B	protein_coding	717.223	1.53145	0.251553	6.08798	1.14342e-09	4.45442e-09
HEY2	protein_coding	272.739	-1.00245	0.164719	-6.08583	1.15891e-09	4.51216e-09
EIF5A2	protein_coding	294.681	1.39769	0.229701	6.08482	1.16625e-09	4.53947e-09
KIF26B	protein_coding	203.047	1.75555	0.289333	6.06757	1.29858e-09	5.02297e-09
MYC	protein_coding	2746.74	-1.20179	0.198084	-6.0671	1.30243e-09	5.03502e-09
PLPP2	protein_coding	1023.32	2.0971	0.345693	6.06638	1.30828e-09	5.05619e-09
TSPAN15	protein_coding	750.861	1.24582	0.205427	6.06456	1.32312e-09	5.10918e-09
TLE6	protein_coding	156.965	1.32116	0.217885	6.06357	1.33136e-09	5.1352e-09
ASPG	protein_coding	1935.18	-2.06471	0.340508	-6.06361	1.33104e-09	5.1352e-09
PAQR8	protein_coding	291.61	1.31271	0.216539	6.06225	1.34232e-09	5.17602e-09
CA5B	protein_coding	175.861	1.11584	0.184087	6.06149	1.34866e-09	5.19897e-09
COL1A2	protein_coding	11096.5	1.42139	0.234649	6.05751	1.38241e-09	5.32457e-09
MAPK13	protein_coding	784.061	1.59246	0.263021	6.05447	1.40877e-09	5.41997e-09
AIF1L	protein_coding	406.497	1.18621	0.195965	6.05318	1.42016e-09	5.46072e-09
COL21A1	protein_coding	146.046	1.40497	0.232519	6.0424	1.51839e-09	5.81546e-09
AOX1	protein_coding	39669.2	-1.46432	0.242672	-6.03414	1.5981e-09	6.1053e-09
AMBP	protein_coding	306196	-1.03422	0.171694	-6.02363	1.70548e-09	6.50457e-09
ZNF467	protein_coding	500.71	1.13706	0.188815	6.02207	1.72196e-09	6.56561e-09
VNN2	protein_coding	720.843	1.70611	0.283398	6.0202	1.74204e-09	6.63661e-09
CSF1R	protein_coding	1390.3	-1.03272	0.171566	-6.01939	1.75074e-09	6.66417e-09
GDAP1	protein_coding	230.168	1.01902	0.169325	6.01814	1.76431e-09	6.71207e-09
TTR	protein_coding	125723	-1.50444	0.249995	-6.01787	1.76731e-09	6.71974e-09
KRBA1	protein_coding	191.533	1.07215	0.178237	6.01529	1.79568e-09	6.82379e-09
NUPR1	protein_coding	12689.9	1.06123	0.17652	6.01197	1.83287e-09	6.95348e-09
KRT23	protein_coding	1619.09	2.52626	0.42025	6.01133	1.84011e-09	6.97511e-09
ENO3	protein_coding	2013.02	-1.602	0.266503	-6.0112	1.84159e-09	6.97878e-09
TRIM6	protein_coding	93.4636	1.30013	0.216457	6.00642	1.89662e-09	7.17337e-09
TNXB	protein_coding	443.379	-1.37903	0.229653	-6.00483	1.91529e-09	7.23996e-09
SLAIN1	protein_coding	133.367	-1.59034	0.265094	-5.99915	1.98352e-09	7.48956e-09
SELP	protein_coding	111.993	-1.48124	0.247041	-5.99594	2.02311e-09	7.6264e-09
SLCO1B1	protein_coding	6590.12	-1.30827	0.218332	-5.99212	2.07121e-09	7.79691e-09
NPNT	protein_coding	668.937	1.56195	0.260692	5.99154	2.07862e-09	7.82264e-09
HMGCS2	protein_coding	64198	-1.19893	0.200197	-5.98872	2.11495e-09	7.95062e-09
ANO9	protein_coding	213.359	1.63976	0.273888	5.98695	2.13815e-09	8.03359e-09
CLIC5	protein_coding	146.975	1.41007	0.235668	5.98328	2.18682e-09	8.20945e-09
SLC46A3	protein_coding	2426.19	-1.37053	0.229374	-5.97509	2.29957e-09	8.61137e-09
COLEC11	protein_coding	2184.86	-1.41821	0.237695	-5.96651	2.42376e-09	9.05655e-09
PODXL2	protein_coding	430.819	2.08338	0.349648	5.95851	2.54551e-09	9.48546e-09
CCL2	protein_coding	787.582	-1.3663	0.229384	-5.95638	2.57884e-09	9.60179e-09
ANGPTL3	protein_coding	17445	-1.16671	0.195915	-5.95519	2.59769e-09	9.66407e-09
CHST10	protein_coding	138.643	1.24824	0.209618	5.9548	2.60384e-09	9.68164e-09
ENPEP	protein_coding	2222.52	-1.06852	0.179578	-5.95017	2.67864e-09	9.9462e-09
DNAJC12	protein_coding	841.454	-1.42279	0.239348	-5.94446	2.77372e-09	1.02909e-08
TRPM8	protein_coding	1213.84	-1.48352	0.249772	-5.9395	2.85888e-09	1.05924e-08
CDA	protein_coding	962.946	-1.35722	0.228536	-5.93877	2.87164e-09	1.06339e-08
ABCA8	protein_coding	1371.35	-1.49589	0.251931	-5.9377	2.89043e-09	1.07006e-08
FCGR3A	protein_coding	1572.05	-1.16721	0.196728	-5.93312	2.97232e-09	1.09888e-08
PLGLB1	protein_coding	131.843	-1.24126	0.209267	-5.93145	3.00263e-09	1.10918e-08
PTGFR	protein_coding	305.717	2.07935	0.350927	5.92531	3.11709e-09	1.15022e-08
FBLN1	protein_coding	2068.02	1.49026	0.252233	5.90825	3.45761e-09	1.269e-08
PFKP	protein_coding	837.423	1.51518	0.256498	5.9072	3.47976e-09	1.27679e-08
B3GNT3	protein_coding	668.183	1.88797	0.320154	5.89707	3.70011e-09	1.354e-08
COL5A3	protein_coding	2627.51	1.2931	0.219395	5.89392	3.77148e-09	1.37937e-08
PLA2G16	protein_coding	2770.73	-1.0179	0.172982	-5.88445	3.99378e-09	1.45598e-08
CHST7	protein_coding	314.862	-1.04471	0.177582	-5.88294	4.03044e-09	1.46817e-08
ITIH1	protein_coding	84074.1	-1.0972	0.186807	-5.87342	4.26896e-09	1.55133e-08
PON1	protein_coding	16504.4	-1.37358	0.234051	-5.86873	4.39152e-09	1.59459e-08
PGLYRP2	protein_coding	8322.65	-1.56023	0.265876	-5.86826	4.4039e-09	1.59866e-08
C2orf82	protein_coding	1089.2	1.43204	0.244065	5.86748	4.42478e-09	1.60581e-08
TFR2	protein_coding	38003.1	-1.03538	0.176593	-5.86306	4.54417e-09	1.64738e-08
HSD17B13	protein_coding	9138.64	-2.25769	0.385277	-5.85992	4.6309e-09	1.67838e-08
SPTBN2	protein_coding	1702.55	-1.24725	0.212857	-5.85956	4.64085e-09	1.68154e-08
RARRES1	protein_coding	454.102	1.53189	0.261535	5.8573	4.7046e-09	1.70373e-08
AKR7A3	protein_coding	3887.61	-1.47458	0.251945	-5.85279	4.83384e-09	1.74821e-08
GOT1	protein_coding	15352.8	-1.00178	0.171221	-5.8508	4.89225e-09	1.76746e-08
SLC1A3	protein_coding	333.607	1.18014	0.201723	5.85033	4.9061e-09	1.77199e-08
TTYH2	protein_coding	218.252	1.14104	0.195338	5.84136	5.17779e-09	1.86419e-08
KHK	protein_coding	10434.4	-1.0263	0.175706	-5.84103	5.18783e-09	1.86732e-08
CBLN1	protein_coding	107.273	1.52226	0.260668	5.83985	5.22463e-09	1.87957e-08
CMBL	protein_coding	8423.71	-1.08623	0.186023	-5.83923	5.24434e-09	1.88571e-08
BGN	protein_coding	11992.3	-1.21856	0.208922	-5.8326	5.45698e-09	1.95851e-08
RNASE4	protein_coding	1032.67	-1.0512	0.180239	-5.83225	5.46835e-09	1.96155e-08
KIAA1549	protein_coding	237.703	1.47321	0.252639	5.83129	5.50004e-09	1.97188e-08
SCUBE1	protein_coding	922.96	2.00433	0.34374	5.83095	5.51115e-09	1.97535e-08
NRSN2	protein_coding	589.359	1.3257	0.227655	5.82328	5.77044e-09	2.06394e-08
NFE2L3	protein_coding	337.954	1.04596	0.179623	5.82308	5.77734e-09	2.06587e-08
TMEM47	protein_coding	851.912	-1.06376	0.182703	-5.82234	5.80311e-09	2.07345e-08
FCGR2B	protein_coding	332.613	-1.69964	0.292726	-5.80626	6.38853e-09	2.26954e-08
IL2RB	protein_coding	380.057	-1.14206	0.196757	-5.80439	6.46007e-09	2.29435e-08
SNCAIP	protein_coding	153.827	1.49483	0.257844	5.79744	6.73357e-09	2.38776e-08
USP54	protein_coding	300.473	1.09134	0.188326	5.79493	6.83497e-09	2.42119e-08
SOAT2	protein_coding	444.697	2.03578	0.351382	5.79365	6.88746e-09	2.43852e-08
SLC2A2	protein_coding	19666.2	-1.18593	0.204736	-5.79249	6.93495e-09	2.45469e-08
CRACR2B	protein_coding	337.537	1.336	0.231004	5.78346	7.31804e-09	2.58291e-08
SUCNR1	protein_coding	176.774	-1.16046	0.200906	-5.77613	7.64363e-09	2.69435e-08
BCAM	protein_coding	8288.25	1.00727	0.174627	5.76812	8.01593e-09	2.82193e-08
SLC1A1	protein_coding	2065.17	-1.42086	0.246368	-5.7672	8.0599e-09	2.83595e-08
GAL3ST4	protein_coding	114.048	1.2201	0.211622	5.76548	8.14266e-09	2.86285e-08
SLC39A4	protein_coding	954.974	1.74219	0.302339	5.76235	8.29489e-09	2.91111e-08
PRKCB	protein_coding	196.514	-1.15295	0.200157	-5.76023	8.39996e-09	2.94647e-08
GLS2	protein_coding	491.726	-1.99947	0.347509	-5.75373	8.72943e-09	3.0534e-08
PTGIR	protein_coding	142.651	-1.09624	0.190956	-5.74079	9.42373e-09	3.28445e-08
LTBP2	protein_coding	1309.46	1.2297	0.214307	5.73802	9.57875e-09	3.33678e-08
BDKRB2	protein_coding	276.731	1.39282	0.242922	5.73359	9.83244e-09	3.42078e-08
GREB1	protein_coding	671.477	1.45213	0.253344	5.73184	9.93454e-09	3.45453e-08
DPT	protein_coding	373.868	-1.99125	0.347882	-5.72393	1.04087e-08	3.60836e-08
LIPG	protein_coding	2058.58	-1.12234	0.196671	-5.70667	1.15211e-08	3.97378e-08
LEAP2	protein_coding	5579.3	-1.16448	0.204337	-5.69882	1.2064e-08	4.14548e-08
ABCA4	protein_coding	108.67	1.15729	0.203247	5.69402	1.24081e-08	4.25602e-08
ASRGL1	protein_coding	317.446	1.20803	0.212243	5.69172	1.25766e-08	4.30948e-08
DGAT2	protein_coding	8459.04	-1.06883	0.187883	-5.68878	1.27949e-08	4.383e-08
PDZD2	protein_coding	117.715	1.05548	0.185598	5.6869	1.29368e-08	4.42956e-08
C1QC	protein_coding	4743.03	-1.05906	0.186267	-5.6857	1.30275e-08	4.45839e-08
UAP1L1	protein_coding	391.703	1.36975	0.240915	5.68559	1.30359e-08	4.45902e-08
KLF4	protein_coding	573.724	-1.15357	0.202924	-5.68475	1.31003e-08	4.47993e-08
RBP4	protein_coding	261442	-1.03698	0.182663	-5.67704	1.37044e-08	4.67712e-08
SIPA1L2	protein_coding	1400.06	1.10222	0.195076	5.65019	1.60274e-08	5.43457e-08
CPN2	protein_coding	12054.1	-1.11468	0.197282	-5.65019	1.60272e-08	5.43457e-08
MT1G	protein_coding	19291.3	-2.48335	0.440504	-5.63753	1.72511e-08	5.82773e-08
CPT1C	protein_coding	86.2995	1.00477	0.178708	5.62242	1.88296e-08	6.33587e-08
TKFC	protein_coding	8462.91	-1.09573	0.194899	-5.62206	1.88694e-08	6.34614e-08
G0S2	protein_coding	5007.82	-1.50155	0.267934	-5.60416	2.09263e-08	7.00334e-08
SOX4	protein_coding	1581.39	1.22835	0.219239	5.6028	2.10921e-08	7.05191e-08
SLC2A6	protein_coding	450.567	1.10982	0.198117	5.60181	2.1212e-08	7.09026e-08
SAMD5	protein_coding	398.598	-1.60735	0.286968	-5.60116	2.1292e-08	7.11525e-08
BBOX1	protein_coding	877.055	-1.76635	0.315368	-5.6009	2.13242e-08	7.12427e-08
JCHAIN	protein_coding	1069.07	-1.83416	0.327492	-5.60062	2.13584e-08	7.13221e-08
MLLT11	protein_coding	274.036	1.32059	0.235878	5.59862	2.16065e-08	7.20798e-08
HSD17B3	protein_coding	117.82	1.23115	0.220131	5.5928	2.23437e-08	7.43752e-08
SYNPO2	protein_coding	494.825	-1.08124	0.193405	-5.59055	2.26356e-08	7.52919e-08
FNDC4	protein_coding	2529.72	-1.08212	0.19359	-5.58974	2.27413e-08	7.56248e-08
ERICH5	protein_coding	1715.34	1.56578	0.280137	5.58932	2.2796e-08	7.57882e-08
KCNIP3	protein_coding	162.856	1.55877	0.279453	5.57793	2.43391e-08	8.06041e-08
GPR161	protein_coding	117.399	1.0061	0.180542	5.57267	2.50871e-08	8.292e-08
PTGIS	protein_coding	345.601	-1.61648	0.290103	-5.57208	2.51723e-08	8.31612e-08
ZNF726	protein_coding	102.165	1.25168	0.22504	5.56201	2.66684e-08	8.78485e-08
COL4A5	protein_coding	356.939	1.75402	0.315761	5.5549	2.7777e-08	9.13678e-08
NOTUM	protein_coding	4548.36	2.20866	0.398016	5.54918	2.87019e-08	9.42736e-08
CD180	protein_coding	108.947	-1.01197	0.182419	-5.54749	2.89795e-08	9.51626e-08
XDH	protein_coding	3304.42	-1.29093	0.232751	-5.54642	2.9158e-08	9.57255e-08
BHMT	protein_coding	19621.7	-1.63	0.293963	-5.54493	2.94074e-08	9.64978e-08
A1BG	protein_coding	5164.82	-1.23777	0.223525	-5.5375	3.06824e-08	1.00488e-07
IGFBP1	protein_coding	37922.3	-1.3966	0.252332	-5.53477	3.11635e-08	1.02039e-07
APOA1	protein_coding	400514	-1.35369	0.244587	-5.53459	3.11964e-08	1.02123e-07
SH3RF3	protein_coding	286.717	1.27718	0.23086	5.53228	3.16094e-08	1.0335e-07
SALL2	protein_coding	202.72	1.46409	0.264941	5.52611	3.27411e-08	1.06987e-07
ULK4	protein_coding	308.821	1.10966	0.200935	5.52249	3.34236e-08	1.09151e-07
STC1	protein_coding	598.449	1.07397	0.194475	5.52243	3.34347e-08	1.09161e-07
ANG	protein_coding	23688.4	-1.16642	0.212024	-5.50135	3.76885e-08	1.22288e-07
NOV	protein_coding	120.259	1.1333	0.206119	5.49829	3.83493e-08	1.24314e-07
TAGAP	protein_coding	119.731	-1.09261	0.1989	-5.49329	3.94521e-08	1.27646e-07
FUT1	protein_coding	149.078	1.0022	0.182595	5.48864	4.05043e-08	1.30913e-07
DPYS	protein_coding	12593.3	-1.22806	0.223951	-5.48358	4.16795e-08	1.34565e-07
FRZB	protein_coding	378.251	1.11022	0.202785	5.47489	4.37786e-08	1.41041e-07
S100A8	protein_coding	222.257	-1.51793	0.277255	-5.47483	4.37927e-08	1.41054e-07
SEMA6D	protein_coding	126.653	-1.1546	0.211122	-5.46886	4.52927e-08	1.45713e-07
PHLDA3	protein_coding	896.941	1.27327	0.232828	5.4687	4.53355e-08	1.45816e-07
SERPINA4	protein_coding	12661.5	-1.17772	0.215867	-5.45574	4.87684e-08	1.56354e-07
AGXT	protein_coding	65297.3	-1.21412	0.222663	-5.45273	4.96029e-08	1.58867e-07
ITGA11	protein_coding	204.901	1.09162	0.200431	5.44636	5.14098e-08	1.6423e-07
CDHR2	protein_coding	1961.52	-1.90283	0.349463	-5.445	5.18052e-08	1.65299e-07
SLC4A4	protein_coding	1463.39	-1.25472	0.230713	-5.43846	5.37434e-08	1.70963e-07
PKIB	protein_coding	362.307	1.52628	0.280645	5.43847	5.37396e-08	1.70963e-07
SAA2-SAA4	protein_coding	2779.07	-2.25565	0.414788	-5.43808	5.38583e-08	1.71249e-07
ANK3	protein_coding	376.779	-1.27087	0.233725	-5.43747	5.40412e-08	1.7179e-07
TF	protein_coding	372899	-1.046	0.19248	-5.43433	5.50022e-08	1.74479e-07
SLC25A25	protein_coding	4285.85	-1.0206	0.188211	-5.42263	5.87283e-08	1.85737e-07
CYP2C18	protein_coding	2552.83	-1.21727	0.224559	-5.42073	5.93572e-08	1.87552e-07
RAVER2	protein_coding	277.931	1.06848	0.197263	5.41655	6.076e-08	1.91785e-07
MTTP	protein_coding	8481.34	-1.09403	0.202126	-5.41263	6.21075e-08	1.95788e-07
WNT11	protein_coding	235.383	-1.48686	0.275342	-5.40005	6.66216e-08	2.09582e-07
EFHD1	protein_coding	1064.63	-1.35831	0.252112	-5.38772	7.1359e-08	2.23865e-07
SVEP1	protein_coding	334.208	-1.47015	0.272982	-5.38551	7.22404e-08	2.26422e-07
EXPH5	protein_coding	322.576	-1.48405	0.27595	-5.37796	7.53345e-08	2.35849e-07
GPX8	protein_coding	201.362	1.02738	0.191197	5.37341	7.72633e-08	2.41443e-07
NRG1	protein_coding	329.005	-1.90145	0.354507	-5.36365	8.15565e-08	2.54218e-07
DMRTA1	protein_coding	490.489	-1.0092	0.188892	-5.34272	9.15619e-08	2.84171e-07
SLCO2A1	protein_coding	565.802	1.21285	0.227018	5.34252	9.16627e-08	2.84419e-07
ELOVL7	protein_coding	400.397	1.70054	0.318323	5.34217	9.18388e-08	2.84901e-07
TMED3	protein_coding	1570.87	1.23066	0.23117	5.32362	1.01724e-07	3.14565e-07
OAS2	protein_coding	1866.28	-1.14293	0.214694	-5.32351	1.01782e-07	3.14673e-07
SAMSN1	protein_coding	162.741	-1.01681	0.191044	-5.32241	1.02402e-07	3.16445e-07
FKBP10	protein_coding	1368.91	1.29838	0.24396	5.32209	1.02584e-07	3.16937e-07
DMKN	protein_coding	476.454	2.07499	0.390155	5.31838	1.04698e-07	3.23028e-07
NR1I2	protein_coding	1759.71	-1.37859	0.259237	-5.31788	1.04986e-07	3.2377e-07
APOH	protein_coding	215373	-1.02496	0.192874	-5.31415	1.07155e-07	3.29712e-07
FGL1	protein_coding	78393.2	-1.29492	0.243672	-5.31421	1.07118e-07	3.29712e-07
CYP7A1	protein_coding	3643.88	1.84266	0.347489	5.3028	1.14041e-07	3.49404e-07
FAM110C	protein_coding	787.775	-1.20516	0.227379	-5.30021	1.15672e-07	3.54002e-07
SAA2	protein_coding	27879.3	-2.27855	0.430519	-5.29255	1.20622e-07	3.67993e-07
SPP2	protein_coding	5196.68	-1.6103	0.304316	-5.29153	1.21297e-07	3.69888e-07
ART4	protein_coding	1035.12	-1.11899	0.211531	-5.28996	1.22342e-07	3.72659e-07
MYO16	protein_coding	129.613	-1.09889	0.207811	-5.28793	1.23707e-07	3.76564e-07
ADGRG1	protein_coding	1148.1	1.07242	0.202908	5.28525	1.25534e-07	3.81698e-07
KDELR3	protein_coding	1054.42	1.00674	0.190483	5.28519	1.25575e-07	3.81738e-07
SLC16A11	protein_coding	1112.46	1.45785	0.276032	5.28144	1.28171e-07	3.89196e-07
TM6SF2	protein_coding	818.23	-1.14399	0.216686	-5.27948	1.29552e-07	3.93038e-07
GNMT	protein_coding	4620.82	-1.55202	0.294214	-5.27515	1.32646e-07	4.02156e-07
SLC6A12	protein_coding	2640.16	-1.17514	0.22285	-5.27324	1.34039e-07	4.06199e-07
CD274	protein_coding	105.45	-1.01353	0.192339	-5.26949	1.368e-07	4.14199e-07
DCDC2	protein_coding	1430.36	1.65174	0.313594	5.26714	1.38565e-07	4.18982e-07
CES5A	protein_coding	122.328	-1.4577	0.27681	-5.26608	1.3937e-07	4.21232e-07
PDGFRA	protein_coding	678.529	-1.57961	0.300191	-5.26203	1.42473e-07	4.30229e-07
EHF	protein_coding	330.124	1.46869	0.279552	5.25374	1.49039e-07	4.48763e-07
C1QB	protein_coding	6134.34	-1.04788	0.199763	-5.24562	1.55761e-07	4.67557e-07
SNAP25	protein_coding	213.868	1.66609	0.317658	5.24491	1.56355e-07	4.69236e-07
ATP10A	protein_coding	160.926	1.33897	0.2557	5.23649	1.6366e-07	4.90189e-07
CES3	protein_coding	1868.19	-1.14966	0.219559	-5.23622	1.63898e-07	4.90795e-07
LRP12	protein_coding	196.982	1.06591	0.203768	5.23101	1.6859e-07	5.04175e-07
PRR15L	protein_coding	324.719	1.68867	0.322861	5.23033	1.6921e-07	5.057e-07
VLDLR	protein_coding	355.593	1.55935	0.298195	5.22929	1.70164e-07	5.0844e-07
EGLN3	protein_coding	437.365	1.43954	0.275529	5.22464	1.74498e-07	5.20933e-07
HK2	protein_coding	480.063	1.54323	0.295589	5.22085	1.78099e-07	5.30871e-07
CFHR3	protein_coding	6772.17	-1.58139	0.302967	-5.21969	1.79223e-07	5.33754e-07
HID1	protein_coding	663.684	1.0799	0.206923	5.21883	1.80054e-07	5.35995e-07
SULF1	protein_coding	761.139	1.39073	0.266615	5.21625	1.82578e-07	5.43034e-07
SOX9	protein_coding	1523.44	1.25473	0.240826	5.21009	1.88752e-07	5.60541e-07
ADH1C	protein_coding	27468.3	-1.55377	0.298259	-5.20946	1.89387e-07	5.62302e-07
HABP2	protein_coding	17997.1	-1.11748	0.214729	-5.20412	1.94915e-07	5.77334e-07
TMEM25	protein_coding	392.637	-1.06927	0.205669	-5.19899	2.0037e-07	5.91947e-07
CNGA1	protein_coding	658.252	-1.27058	0.244749	-5.19137	2.0875e-07	6.15371e-07
IGF1	protein_coding	457.301	-1.30961	0.252287	-5.19096	2.09208e-07	6.16587e-07
DERL3	protein_coding	430.396	1.25486	0.241962	5.18622	2.14609e-07	6.31412e-07
SDK1	protein_coding	182.399	1.56869	0.302493	5.18586	2.15015e-07	6.3247e-07
HTRA3	protein_coding	349.71	1.35797	0.262113	5.18084	2.20885e-07	6.48757e-07
RND1	protein_coding	2938.82	-1.03094	0.199271	-5.17355	2.29684e-07	6.72862e-07
MT1M	protein_coding	2157.08	-2.24735	0.434502	-5.17223	2.3132e-07	6.77214e-07
APOC3	protein_coding	208161	-1.18791	0.229754	-5.17036	2.33645e-07	6.83437e-07
CU639417.2	protein_coding	814.486	-1.13952	0.220544	-5.16685	2.38073e-07	6.95642e-07
RUNDC3B	protein_coding	383.588	-1.05517	0.204647	-5.15602	2.5226e-07	7.34578e-07
LIPC	protein_coding	5825.6	-1.00304	0.194556	-5.15554	2.52903e-07	7.36292e-07
C10orf35	protein_coding	187.638	1.04786	0.203263	5.1552	2.53364e-07	7.37477e-07
GPAT3	protein_coding	770.065	-1.07979	0.209543	-5.15305	2.56277e-07	7.45479e-07
HBA2	protein_coding	516.1	-1.47892	0.287076	-5.15166	2.58197e-07	7.50582e-07
ACADL	protein_coding	576.241	-1.44319	0.280548	-5.1442	2.6867e-07	7.79199e-07
VNN1	protein_coding	7229.72	-1.4554	0.283628	-5.13139	2.87611e-07	8.31126e-07
ACSM2A	protein_coding	10773.5	-1.19926	0.233721	-5.13118	2.87938e-07	8.31895e-07
CNTD2	protein_coding	173.09	1.46309	0.285308	5.12811	2.92658e-07	8.44816e-07
HSPB8	protein_coding	833.646	1.45285	0.284447	5.10762	3.26247e-07	9.36422e-07
MPPED1	protein_coding	556.271	-1.46232	0.286802	-5.09873	3.41946e-07	9.78804e-07
PARM1	protein_coding	319.145	1.12888	0.221822	5.08912	3.59736e-07	1.028e-06
RTL5	protein_coding	255.925	-1.07812	0.2123	-5.07827	3.80887e-07	1.08526e-06
TRABD2A	protein_coding	261.556	1.46918	0.289524	5.07446	3.88602e-07	1.10585e-06
AR	protein_coding	4347.9	-1.15983	0.228803	-5.06912	3.99667e-07	1.13568e-06
NR0B2	protein_coding	3330.65	-1.07355	0.212002	-5.06384	4.10898e-07	1.16492e-06
IFIT1	protein_coding	2352.15	-1.11767	0.22083	-5.0612	4.16616e-07	1.17991e-06
HOPX	protein_coding	122.803	1.04969	0.207576	5.05688	4.26162e-07	1.20544e-06
NBL1	protein_coding	313.457	1.18376	0.234373	5.05076	4.40064e-07	1.24193e-06
FMO3	protein_coding	18160.9	-1.15059	0.228037	-5.0456	4.52089e-07	1.27428e-06
ZNF468	protein_coding	341.067	1.01784	0.201897	5.04138	4.62184e-07	1.30112e-06
AHNAK2	protein_coding	208.462	1.62647	0.322964	5.03607	4.75199e-07	1.33611e-06
CHRM3	protein_coding	167.661	1.26554	0.251511	5.03174	4.86051e-07	1.36493e-06
FCGBP	protein_coding	521.478	1.35003	0.268331	5.03122	4.8736e-07	1.36832e-06
APCS	protein_coding	44160.4	-1.16685	0.232198	-5.02524	5.02807e-07	1.41024e-06
PDK4	protein_coding	8397.65	-1.22533	0.244134	-5.01909	5.19158e-07	1.45251e-06
SNAI2	protein_coding	548.534	1.08301	0.21596	5.01486	5.30729e-07	1.48336e-06
GLIS2	protein_coding	513.21	1.02478	0.204428	5.01292	5.36093e-07	1.49669e-06
CMPK2	protein_coding	377.711	-1.02636	0.204886	-5.00943	5.45925e-07	1.52271e-06
RNF43	protein_coding	1368.98	1.05508	0.211285	4.99361	5.92612e-07	1.64653e-06
HGFAC	protein_coding	5083.27	-1.76952	0.354746	-4.98812	6.09687e-07	1.69053e-06
KLHDC7B	protein_coding	89.7042	1.10905	0.222334	4.98819	6.09489e-07	1.69053e-06
ACOT12	protein_coding	1923.08	-1.18168	0.237365	-4.97834	6.41321e-07	1.77319e-06
PHYHD1	protein_coding	1094.42	-1.24872	0.25158	-4.96352	6.92258e-07	1.9063e-06
SAA1	protein_coding	73331.4	-2.02716	0.40883	-4.95844	7.10616e-07	1.95393e-06
MYO7B	protein_coding	293.871	1.34542	0.272255	4.94174	7.74267e-07	2.12184e-06
WFDC1	protein_coding	92.9136	-1.06649	0.215816	-4.94165	7.74636e-07	2.12243e-06
RAMP1	protein_coding	4604.85	1.08704	0.220011	4.94085	7.77822e-07	2.12987e-06
PRG4	protein_coding	7959.72	-1.3481	0.272887	-4.94015	7.80632e-07	2.1367e-06
RBP5	protein_coding	5300.89	-1.02852	0.208487	-4.93328	8.08605e-07	2.20972e-06
KCNJ4	protein_coding	171.775	1.52258	0.30881	4.93048	8.20277e-07	2.23893e-06
TTPA	protein_coding	2749.98	-1.06981	0.217192	-4.92564	8.40837e-07	2.29137e-06
RASD1	protein_coding	2601.74	-1.23416	0.251119	-4.91466	8.89375e-07	2.41929e-06
SLC10A1	protein_coding	8249.21	-1.52268	0.309913	-4.91325	8.95785e-07	2.43624e-06
ATF5	protein_coding	33252.4	-1.28644	0.262313	-4.90421	9.38017e-07	2.54653e-06
TMEM54	protein_coding	617.432	1.0862	0.221497	4.9039	9.39534e-07	2.55014e-06
SERPINA3	protein_coding	1100.41	-1.12253	0.229273	-4.89606	9.77775e-07	2.64813e-06
LGR5	protein_coding	494.619	2.09585	0.428144	4.89521	9.82027e-07	2.65912e-06
PAPLN	protein_coding	615.193	1.33949	0.273785	4.89249	9.95683e-07	2.69449e-06
PIK3C2G	protein_coding	473.686	-1.22677	0.250753	-4.89233	9.96503e-07	2.69617e-06
PRR5L	protein_coding	273.907	1.12268	0.229588	4.88997	1.00851e-06	2.72701e-06
CAMK2B	protein_coding	234.033	-1.60794	0.329113	-4.88567	1.03076e-06	2.78444e-06
NUGGC	protein_coding	827.494	-1.19096	0.243773	-4.88552	1.03155e-06	2.78602e-06
IHH	protein_coding	283.912	1.23491	0.252878	4.88343	1.04257e-06	2.81467e-06
TRPV4	protein_coding	377.513	-1.27571	0.262299	-4.86356	1.15292e-06	3.09725e-06
WDR72	protein_coding	1289.18	-1.30762	0.269153	-4.8583	1.18398e-06	3.1763e-06
OASL	protein_coding	1294.21	-1.10257	0.227215	-4.85255	1.21883e-06	3.26594e-06
HMGN5	protein_coding	250.502	-1.02094	0.21059	-4.848	1.24714e-06	3.33525e-06
ITPR3	protein_coding	534.225	1.3246	0.273331	4.84612	1.25897e-06	3.36556e-06
ST6GALNAC2	protein_coding	197.211	1.02747	0.212447	4.83636	1.32241e-06	3.52618e-06
ADRB2	protein_coding	366.141	-1.02898	0.212799	-4.83545	1.32846e-06	3.53954e-06
DDR1	protein_coding	1740.5	1.1747	0.242999	4.83417	1.33701e-06	3.55953e-06
S100A6	protein_coding	3932.92	1.1703	0.242792	4.82018	1.43427e-06	3.80878e-06
CLGN	protein_coding	561.891	1.34652	0.279598	4.81591	1.46533e-06	3.88447e-06
INHBA	protein_coding	636.09	-1.01881	0.211568	-4.81553	1.46807e-06	3.88946e-06
CYP3A43	protein_coding	224.941	-1.43627	0.29896	-4.80423	1.55351e-06	4.10782e-06
SLCO1B3	protein_coding	1300.23	-2.03336	0.424194	-4.79346	1.63931e-06	4.328e-06
SLC1A7	protein_coding	399.207	1.68315	0.351657	4.78634	1.69851e-06	4.47649e-06
PRODH2	protein_coding	4323.71	-1.04625	0.219104	-4.77514	1.79581e-06	4.71787e-06
DKK3	protein_coding	1349.88	1.16718	0.244569	4.77239	1.82053e-06	4.77407e-06
PYCARD	protein_coding	711.714	1.01578	0.21288	4.77159	1.82777e-06	4.79029e-06
MFAP4	protein_coding	928.449	-1.4946	0.313722	-4.76407	1.89727e-06	4.96195e-06
ARG2	protein_coding	188.625	1.24034	0.260504	4.76129	1.92358e-06	5.02402e-06
ZNF813	protein_coding	162.624	1.02862	0.217853	4.72164	2.33946e-06	6.05108e-06
QPCT	protein_coding	132.608	1.06736	0.226767	4.70685	2.5158e-06	6.47523e-06
SULT1A2	protein_coding	867.649	-1.02462	0.217853	-4.70324	2.56059e-06	6.58183e-06
ACSL6	protein_coding	640.603	1.32362	0.281544	4.70128	2.58536e-06	6.643e-06
FXYD2	protein_coding	973.516	2.01268	0.428442	4.69768	2.63137e-06	6.75358e-06
DCXR	protein_coding	34479.5	-1.03215	0.220192	-4.68749	2.76582e-06	7.07822e-06
SERPINE2	protein_coding	1124.79	1.1959	0.255599	4.67882	2.88529e-06	7.37057e-06
CYP8B1	protein_coding	18995.6	-1.51761	0.325374	-4.66421	3.09811e-06	7.8788e-06
CRISPLD2	protein_coding	904.679	-1.06217	0.227773	-4.66327	3.1122e-06	7.91167e-06
NEURL3	protein_coding	216.03	1.19166	0.255876	4.65718	3.20572e-06	8.13273e-06
EFCAB12	protein_coding	214.929	1.14853	0.247223	4.64574	3.38864e-06	8.57603e-06
ANGPTL1	protein_coding	351.792	-1.30984	0.282268	-4.64041	3.47718e-06	8.78218e-06
ZDBF2	protein_coding	125.924	-1.14301	0.246472	-4.63748	3.52683e-06	8.8977e-06
LAMB3	protein_coding	1314.62	1.08029	0.233178	4.63291	3.6056e-06	9.08296e-06
GBP7	protein_coding	1418.24	-1.25255	0.270646	-4.62799	3.69226e-06	9.28755e-06
MYH3	protein_coding	162.016	1.10058	0.237885	4.62652	3.71857e-06	9.34854e-06
UGT1A1	protein_coding	4125.28	-1.31992	0.28537	-4.62528	3.74101e-06	9.40323e-06
MGP	protein_coding	1829.7	1.0503	0.227375	4.61926	3.85117e-06	9.66586e-06
ITGA3	protein_coding	881.645	1.12816	0.244317	4.61759	3.88219e-06	9.73655e-06
MCHR1	protein_coding	198.723	1.22082	0.265042	4.60614	4.10214e-06	1.02618e-05
SLC28A1	protein_coding	2125.9	-1.25325	0.272578	-4.59777	4.27039e-06	1.06611e-05
SLC38A1	protein_coding	1705.83	1.02483	0.223528	4.58478	4.54472e-06	1.13087e-05
USH2A	protein_coding	510.726	-1.2436	0.2716	-4.57879	4.67679e-06	1.16331e-05
OTC	protein_coding	5256.12	-1.14863	0.252479	-4.54943	5.37923e-06	1.32978e-05
MLIP	protein_coding	778.665	-1.07953	0.237709	-4.5414	5.58811e-06	1.37817e-05
SULT2A1	protein_coding	27266	-1.13504	0.250014	-4.53992	5.62763e-06	1.38691e-05
POSTN	protein_coding	894.264	1.39077	0.306441	4.53844	5.66711e-06	1.39564e-05
LARGE2	protein_coding	323.416	1.22163	0.269665	4.53019	5.89312e-06	1.44967e-05
HMCN2	protein_coding	460.366	1.4015	0.309785	4.5241	6.06522e-06	1.49018e-05
ARG1	protein_coding	18560.2	-1.08669	0.241706	-4.49591	6.92727e-06	1.69161e-05
MOGAT3	protein_coding	1096.34	1.04185	0.231924	4.4922	7.04899e-06	1.72041e-05
CLRN3	protein_coding	631.455	-1.55063	0.345302	-4.49067	7.10007e-06	1.73163e-05
GSPT2	protein_coding	375.382	-1.10325	0.246716	-4.47175	7.75823e-06	1.88038e-05
DAO	protein_coding	2827.97	-1.04395	0.23417	-4.45809	8.26939e-06	2e-05
TMEM45A	protein_coding	1962.55	-1.1914	0.267471	-4.4543	8.41676e-06	2.03312e-05
RANBP17	protein_coding	126.702	1.15115	0.258552	4.45227	8.49675e-06	2.05026e-05
SSC5D	protein_coding	148.859	-1.07116	0.240948	-4.44562	8.7637e-06	2.11057e-05
SLC29A4	protein_coding	1124.53	1.39694	0.314784	4.43778	9.08906e-06	2.18506e-05
SH2D3A	protein_coding	198.897	1.00046	0.22545	4.43761	9.09633e-06	2.18642e-05
PPARGC1A	protein_coding	2986.42	-1.0829	0.244047	-4.43727	9.11086e-06	2.18953e-05
SYNGR1	protein_coding	619.84	1.07064	0.24141	4.43495	9.20938e-06	2.21204e-05
ANO1	protein_coding	3450.47	-1.12622	0.254159	-4.43116	9.37277e-06	2.24811e-05
ATAD3C	protein_coding	170.971	-1.2479	0.282218	-4.42177	9.78959e-06	2.34355e-05
S100A14	protein_coding	1267.2	1.39453	0.31678	4.40221	1.07153e-05	2.55458e-05
FOXQ1	protein_coding	293.508	1.52159	0.345812	4.40005	1.08225e-05	2.57814e-05
BSPRY	protein_coding	159.553	1.22359	0.278582	4.39222	1.12198e-05	2.66626e-05
RHOBTB1	protein_coding	1134.44	1.17153	0.266838	4.39042	1.1313e-05	2.68749e-05
ARHGEF16	protein_coding	695.674	1.02992	0.234903	4.38445	1.16277e-05	2.75646e-05
SLC39A5	protein_coding	5852.32	-1.15519	0.264194	-4.37248	1.22841e-05	2.90349e-05
SUSD4	protein_coding	741.498	1.41257	0.323467	4.36697	1.25984e-05	2.97521e-05
ME1	protein_coding	1205.95	1.00219	0.229589	4.36515	1.27035e-05	2.99691e-05
SLC13A5	protein_coding	14325	-1.12976	0.258949	-4.36286	1.28371e-05	3.02685e-05
LY96	protein_coding	380.645	1.05049	0.242282	4.33581	1.45223e-05	3.4024e-05
TACSTD2	protein_coding	296.806	-1.48462	0.342729	-4.33176	1.47921e-05	3.46385e-05
FETUB	protein_coding	5091.24	-1.2196	0.284681	-4.2841	1.83479e-05	4.23037e-05
PDE11A	protein_coding	320.661	-1.09728	0.256231	-4.2824	1.84892e-05	4.25997e-05
G6PC	protein_coding	27407.7	-1.05647	0.246785	-4.28094	1.86106e-05	4.28587e-05
CYP2E1	protein_coding	159260	-1.56353	0.365616	-4.27642	1.89927e-05	4.36944e-05
AMN	protein_coding	1923.21	-1.2586	0.295467	-4.25969	2.0471e-05	4.69212e-05
TMEM246	protein_coding	378.502	1.02883	0.24196	4.25208	2.11794e-05	4.84309e-05
AKR1C2	protein_coding	15050.2	1.01893	0.240227	4.24154	2.21986e-05	5.05918e-05
HRG	protein_coding	118143	-1.18548	0.279695	-4.23849	2.25032e-05	5.12345e-05
TAT	protein_coding	49620.1	-1.32699	0.3143	-4.22205	2.42092e-05	5.4853e-05
MRC1	protein_coding	1567.01	-1.09777	0.26137	-4.20005	2.66854e-05	6.01657e-05
CCL20	protein_coding	1734.2	1.33314	0.317447	4.19956	2.67432e-05	6.02838e-05
TFF3	protein_coding	360.417	1.24399	0.297206	4.18563	2.84373e-05	6.38913e-05
RASL10B	protein_coding	551.462	1.47217	0.354199	4.15632	3.23416e-05	7.21755e-05
PPP1R1A	protein_coding	3872.91	-1.14087	0.274573	-4.15508	3.25171e-05	7.25434e-05
BACE2	protein_coding	1533.05	1.19206	0.286977	4.15387	3.26905e-05	7.29065e-05
PLEK2	protein_coding	531.994	-1.1779	0.284963	-4.13352	3.57246e-05	7.92582e-05
CYP3A4	protein_coding	69134.2	-1.68977	0.409725	-4.12416	3.72087e-05	8.23097e-05
VNN3	protein_coding	828.223	-1.01782	0.247297	-4.11576	3.85898e-05	8.52125e-05
EPCAM	protein_coding	2009.91	1.76194	0.428253	4.11425	3.88448e-05	8.5748e-05
SPATA18	protein_coding	239.112	-1.12003	0.272299	-4.11322	3.90176e-05	8.61015e-05
CLDN4	protein_coding	1660.47	1.43854	0.350205	4.1077	3.99612e-05	8.80983e-05
SAMD12	protein_coding	131.232	-1.14042	0.277763	-4.10573	4.03039e-05	8.87533e-05
CPS1	protein_coding	80288.8	-1.18149	0.287891	-4.10394	4.06177e-05	8.94154e-05
GCGR	protein_coding	2068.8	-1.44855	0.354705	-4.08382	4.43012e-05	9.70227e-05
SLCO4C1	protein_coding	239.676	-1.49752	0.368589	-4.06285	4.84768e-05	0.000105612
LRCOL1	protein_coding	351.86	-1.38578	0.341426	-4.05881	4.93237e-05	0.000107315
SPINT1	protein_coding	1381.16	1.40912	0.349645	4.03015	5.57422e-05	0.000120454
PRELP	protein_coding	1029.86	-1.1042	0.275075	-4.01418	5.96535e-05	0.000128579
MXRA5	protein_coding	437.66	-1.01377	0.252842	-4.0095	6.08473e-05	0.000131008
WNT4	protein_coding	317.443	1.32797	0.332065	3.99913	6.35746e-05	0.000136621
BATF	protein_coding	222.36	1.04026	0.260942	3.98654	6.70446e-05	0.000143602
CDS1	protein_coding	242.214	1.20426	0.302605	3.97964	6.90206e-05	0.000147533
RASEF	protein_coding	399.866	1.12431	0.284885	3.94652	7.92945e-05	0.000168411
ADGRG5	protein_coding	307.012	1.14111	0.289294	3.94445	7.99819e-05	0.000169686
LOXL4	protein_coding	1274.6	1.1313	0.288735	3.91813	8.92397e-05	0.000187807
CYP2A6	protein_coding	40471.9	-1.49281	0.382436	-3.90343	9.4839e-05	0.000198946
CRYAB	protein_coding	632.869	1.05471	0.270237	3.9029	9.5047e-05	0.000199352
THRSP	protein_coding	3221.93	-1.55096	0.398449	-3.8925	9.92162e-05	0.000207585
DNAH6	protein_coding	183.538	-1.07041	0.275682	-3.88275	0.000103281	0.000215857
PTPRD	protein_coding	399.879	-1.05289	0.271203	-3.88228	0.000103483	0.000216246
[truncated: 29 more rows]
